# Supplementary material
Source: PubMed Central journal article supplement (PMC6891864)
Supplement: oc9b00722_si_003.pdf [file oc9b00722_si_003.pdf]

## XYZ coordinates of optimized structures

Optimized structures of alkanes adsorbed on Pt and SrTiO<sub>3</sub> surface models (Figures S5, S7, and S10) using SCAN/rvv10 functional are presented below in VASP-style output (CONTCAR/POSCAR) which contain the unit cell vectors and direct coordinates of all atoms. For information on the structure of these files, we refer to the description given in the VASP online manual ([http://cms.mpi.univie.ac.at/vasp/vasp/POSCAR\\_file.html](http://cms.mpi.univie.ac.at/vasp/vasp/POSCAR_file.html)).

### C<sub>4</sub>H<sub>10</sub>···Pt (111)

Energy: -6773.926147 eV

```
1.0000000000000000
16.5000000000000000 0.0000000000000000 0.0000000000000000
0.0000000000000000 9.5261999999999993 0.0000000000000000
0.0000000000000000 0.0000000000000000 23.7360000000000007
Pt C H
96 4 10
Selective dynamics
Direct
0.16667000000000034 0.33332999999999966 0.00000000000000000 F F F
0.00000000000000000 0.83332999999999966 0.00000000000000000 F F F
0.25000000000000000 0.08332999999999966 0.00000000000000000 F F F
0.08332999999999966 0.58332999999999966 0.00000000000000000 F F F
0.08332999999999966 0.08332999999999966 0.00000000000000000 F F F
0.25000000000000000 0.58332999999999966 0.00000000000000000 F F F
0.00000000000000000 0.33332999999999966 0.00000000000000000 F F F
0.16667000000000034 0.83332999999999966 0.00000000000000000 F F F
0.50000000000000000 0.33332999999999966 0.00000000000000000 F F F
0.33332999999999966 0.83332999999999966 0.00000000000000000 F F F
0.58332999999999966 0.08332999999999966 0.00000000000000000 F F F
0.41667000000000034 0.58332999999999966 0.00000000000000000 F F F
0.41667000000000034 0.08332999999999966 0.00000000000000000 F F F
0.58332999999999966 0.58332999999999966 0.00000000000000000 F F F
0.33332999999999966 0.33332999999999966 0.00000000000000000 F F F
0.50000000000000000 0.83332999999999966 0.00000000000000000 F F F
0.83332999999999966 0.33332999999999966 0.00000000000000000 F F F
0.66667000000000034 0.83332999999999966 0.00000000000000000 F F F
0.91667000000000034 0.08332999999999966 0.00000000000000000 F F F
0.75000000000000000 0.58332999999999966 0.00000000000000000 F F F
0.75000000000000000 0.08332999999999966 0.00000000000000000 F F F
0.91667000000000034 0.58332999999999966 0.00000000000000000 F F F
0.66667000000000034 0.33332999999999966 0.00000000000000000 F F F
0.83332999999999966 0.83332999999999966 0.00000000000000000 F F F
0.16667000000000034 0.00000000000000000 0.09459999999999998 F F F
0.00000000000000000 0.50000000000000000 0.09459999999999998 F F F
0.08332999999999966 0.25000000000000000 0.09459999999999998 F F F
0.25000000000000000 0.75000000000000000 0.09459999999999998 F F F
0.25000000000000000 0.25000000000000000 0.09459999999999998 F F F
0.08332999999999966 0.75000000000000000 0.09459999999999998 F F F
0.00000000000000000 0.00000000000000000 0.09459999999999998 F F F
0.16667000000000034 0.50000000000000000 0.09459999999999998 F F F
0.50000000000000000 0.00000000000000000 0.09459999999999998 F F F
0.33332999999999966 0.50000000000000000 0.09459999999999998 F F F
0.41667000000000034 0.25000000000000000 0.09459999999999998 F F F
0.58332999999999966 0.75000000000000000 0.09459999999999998 F F F
0.58332999999999966 0.25000000000000000 0.09459999999999998 F F F
0.41667000000000034 0.75000000000000000 0.09459999999999998 F F F
0.33332999999999966 0.00000000000000000 0.09459999999999998 F F F
0.50000000000000000 0.50000000000000000 0.09459999999999998 F F F
0.83332999999999966 0.00000000000000000 0.09459999999999998 F F F
0.66667000000000034 0.50000000000000000 0.09459999999999998 F F F
0.75000000000000000 0.25000000000000000 0.09459999999999998 F F F
0.91667000000000034 0.75000000000000000 0.09459999999999998 F F F
0.91667000000000034 0.25000000000000000 0.09459999999999998 F F F
```

|                     |                    |                    |   |   |   |
|---------------------|--------------------|--------------------|---|---|---|
| 0.7500000000000000  | 0.7500000000000000 | 0.0945999999999998 | F | F | F |
| 0.6666700000000034  | 0.0000000000000000 | 0.0945999999999998 | F | F | F |
| 0.8333299999999966  | 0.5000000000000000 | 0.0945999999999998 | F | F | F |
| -0.0000340959280349 | 0.1671831626765558 | 0.1885586889516487 | T | T | T |
| 0.1664346900582656  | 0.6672435654304573 | 0.1884580601485501 | T | T | T |
| 0.2499316651915761  | 0.4173307067554584 | 0.1884380454109184 | T | T | T |
| 0.0832158251807918  | 0.9170557672563878 | 0.1885647225435645 | T | T | T |
| 0.0833404071700285  | 0.4170941276997178 | 0.1885275763795623 | T | T | T |
| 0.2497412634359090  | 0.9172031987027039 | 0.1885158304118744 | T | T | T |
| 0.1665435307979193  | 0.1671733810618876 | 0.1885746518445102 | T | T | T |
| 0.0000411520372839  | 0.6670308749757592 | 0.1885735961216664 | T | T | T |
| 0.3332206997863564  | 0.1667563425799899 | 0.1885016309006614 | T | T | T |
| 0.4998779173903806  | 0.6668614548511164 | 0.1884776509321550 | T | T | T |
| 0.5832598467614662  | 0.4170626820659922 | 0.1887134747014191 | T | T | T |
| 0.4165889727732896  | 0.9169192783934017 | 0.1885081905135929 | T | T | T |
| 0.4166444224535475  | 0.4169660436467749 | 0.1885239540588204 | T | T | T |
| 0.5834618427458561  | 0.9168565195812853 | 0.1884702108170347 | T | T | T |
| 0.5000414964951949  | 0.1666503911856742 | 0.1885228479100993 | T | T | T |
| 0.3330508524609069  | 0.6671327478102808 | 0.1884056138923165 | T | T | T |
| 0.6668183490290445  | 0.1669541205354620 | 0.1886071713623261 | T | T | T |
| 0.8335733886171282  | 0.6673355720179962 | 0.1884064613076151 | T | T | T |
| 0.9166983484310309  | 0.4172791567230780 | 0.1885049139960212 | T | T | T |
| 0.7501789813174177  | 0.9170783723243735 | 0.1885414805060324 | T | T | T |
| 0.7499845921845294  | 0.4173185588202036 | 0.1884906232928326 | T | T | T |
| 0.9167594742169325  | 0.9171260274111707 | 0.1885760629971542 | T | T | T |
| 0.8334217043880040  | 0.1672358645420475 | 0.1885875588367817 | T | T | T |
| 0.6667428864927291  | 0.6670611158851333 | 0.1884940985592249 | T | T | T |
| 0.1663423932407807  | 0.3335867414883854 | 0.2843698528925959 | T | T | T |
| 0.0000116241469533  | 0.8338848317522746 | 0.2844418679546554 | T | T | T |
| 0.2495639911595534  | 0.0836457248775494 | 0.2844633730809882 | T | T | T |
| 0.0831663324811097  | 0.5837887150179069 | 0.2843033374363639 | T | T | T |
| 0.0832028836773157  | 0.0835641046322438 | 0.2843828899511411 | T | T | T |
| 0.2493552227009809  | 0.5838210264896037 | 0.2842630804131632 | T | T | T |
| 0.0000422336581284  | 0.3337532835561414 | 0.2843050043932382 | T | T | T |
| 0.1664032232299607  | 0.8337991255890245 | 0.2843981115459546 | T | T | T |
| 0.4996549410328910  | 0.333285235891633  | 0.2841967153655752 | T | T | T |
| 0.3328125013176588  | 0.8345823238712985 | 0.2843331311473959 | T | T | T |
| 0.5835153558744655  | 0.0835749332897642 | 0.2844300935653010 | T | T | T |
| 0.4158456925629566  | 0.5848992388359634 | 0.2840645504301631 | T | T | T |
| 0.4161478541114809  | 0.0835756155707206 | 0.2844656590307964 | T | T | T |
| 0.5835341513088891  | 0.5861407671168478 | 0.2841550751384446 | T | T | T |
| 0.3323917685503224  | 0.3332722049973321 | 0.2840414725264128 | T | T | T |
| 0.4998048515457703  | 0.8354153305098106 | 0.2842220902696738 | T | T | T |
| 0.8338310242559630  | 0.3335956424647443 | 0.2843567265248628 | T | T | T |
| 0.6670696537748974  | 0.8349412935336943 | 0.2844315753201528 | T | T | T |
| 0.9168773805361389  | 0.0836811480073405 | 0.2844249356098723 | T | T | T |
| 0.7505697181672354  | 0.5843485400330437 | 0.2841211565536421 | T | T | T |
| 0.7505444290283935  | 0.0834081539366932 | 0.2845032947698615 | T | T | T |
| 0.9167601467768340  | 0.5839484694460971 | 0.2843095628720468 | T | T | T |
| 0.6673963283205120  | 0.3332913633582152 | 0.2842156414418989 | T | T | T |
| 0.8336309801683653  | 0.8339044468804198 | 0.2844683014934925 | T | T | T |
| 0.5737906210513630  | 0.5117393215659616 | 0.4199202722309830 | T | T | T |
| 0.4988886341407445  | 0.4192287401848052 | 0.4200056913063480 | T | T | T |
| 0.6527523560767079  | 0.4306061354358782 | 0.4214731764473031 | T | T | T |
| 0.4199735927626603  | 0.5007220718682147 | 0.4204113739964750 | T | T | T |
| 0.5709450898079198  | 0.5859175880583259 | 0.4552362246279633 | T | T | T |
| 0.5723319823722089  | 0.5787809523297825 | 0.3813860333036433 | T | T | T |
| 0.5007789525757529  | 0.3505409422884190 | 0.3819851459563550 | T | T | T |
| 0.5011323801692167  | 0.3468518226391542 | 0.4559302733540478 | T | T | T |
| 0.6575798215646376  | 0.3662789107065587 | 0.4594846442842023 | T | T | T |
| 0.6567627679957710  | 0.3582728263552470 | 0.3851278255232752 | T | T | T |
| 0.7053560411513796  | 0.5000784579291288 | 0.4193478979962326 | T | T | T |
| 0.4146582975613485  | 0.5666236079289670 | 0.4579500045788497 | T | T | T |
| 0.3672190025638177  | 0.4316417153972250 | 0.4182833823631772 | T | T | T |
| 0.4166490829529772  | 0.5720333100767331 | 0.3836410590854769 | T | T | T |

**C<sub>6</sub>H<sub>14</sub>···Pt (111)**

**Energy: -6808.970023 eV**

1.0000000000000000

16.500000000000000 0.000000000000000 0.000000000000000  
0.000000000000000 9.526199999999993 0.000000000000000  
0.000000000000000 0.000000000000000 23.736000000000007

Pt C H  
96 6 14

Selective dynamics

Direct

|                    |                    |                    |   |   |   |
|--------------------|--------------------|--------------------|---|---|---|
| 0.1666700000000034 | 0.3333299999999966 | 0.0000000000000000 | F | F | F |
| 0.0000000000000000 | 0.8333299999999966 | 0.0000000000000000 | F | F | F |
| 0.2500000000000000 | 0.0833299999999966 | 0.0000000000000000 | F | F | F |
| 0.0833299999999966 | 0.5833299999999966 | 0.0000000000000000 | F | F | F |
| 0.0833299999999966 | 0.0833299999999966 | 0.0000000000000000 | F | F | F |
| 0.2500000000000000 | 0.5833299999999966 | 0.0000000000000000 | F | F | F |
| 0.0000000000000000 | 0.3333299999999966 | 0.0000000000000000 | F | F | F |
| 0.1666700000000034 | 0.8333299999999966 | 0.0000000000000000 | F | F | F |
| 0.5000000000000000 | 0.3333299999999966 | 0.0000000000000000 | F | F | F |
| 0.3333299999999966 | 0.8333299999999966 | 0.0000000000000000 | F | F | F |
| 0.5833299999999966 | 0.0833299999999966 | 0.0000000000000000 | F | F | F |
| 0.4166700000000034 | 0.5833299999999966 | 0.0000000000000000 | F | F | F |
| 0.4166700000000034 | 0.0833299999999966 | 0.0000000000000000 | F | F | F |
| 0.5833299999999966 | 0.5833299999999966 | 0.0000000000000000 | F | F | F |
| 0.3333299999999966 | 0.3333299999999966 | 0.0000000000000000 | F | F | F |
| 0.5000000000000000 | 0.8333299999999966 | 0.0000000000000000 | F | F | F |
| 0.8333299999999966 | 0.3333299999999966 | 0.0000000000000000 | F | F | F |
| 0.6666700000000034 | 0.8333299999999966 | 0.0000000000000000 | F | F | F |
| 0.9166700000000034 | 0.0833299999999966 | 0.0000000000000000 | F | F | F |
| 0.7500000000000000 | 0.5833299999999966 | 0.0000000000000000 | F | F | F |
| 0.7500000000000000 | 0.0833299999999966 | 0.0000000000000000 | F | F | F |
| 0.9166700000000034 | 0.5833299999999966 | 0.0000000000000000 | F | F | F |
| 0.6666700000000034 | 0.3333299999999966 | 0.0000000000000000 | F | F | F |
| 0.8333299999999966 | 0.8333299999999966 | 0.0000000000000000 | F | F | F |
| 0.1666700000000034 | 0.0000000000000000 | 0.0945999999999998 | F | F | F |
| 0.0000000000000000 | 0.5000000000000000 | 0.0945999999999998 | F | F | F |
| 0.0833299999999966 | 0.2500000000000000 | 0.0945999999999998 | F | F | F |
| 0.2500000000000000 | 0.7500000000000000 | 0.0945999999999998 | F | F | F |
| 0.2500000000000000 | 0.2500000000000000 | 0.0945999999999998 | F | F | F |
| 0.0833299999999966 | 0.7500000000000000 | 0.0945999999999998 | F | F | F |
| 0.0000000000000000 | 0.0000000000000000 | 0.0945999999999998 | F | F | F |
| 0.1666700000000034 | 0.5000000000000000 | 0.0945999999999998 | F | F | F |
| 0.5000000000000000 | 0.0000000000000000 | 0.0945999999999998 | F | F | F |
| 0.3333299999999966 | 0.5000000000000000 | 0.0945999999999998 | F | F | F |
| 0.4166700000000034 | 0.2500000000000000 | 0.0945999999999998 | F | F | F |
| 0.5833299999999966 | 0.7500000000000000 | 0.0945999999999998 | F | F | F |
| 0.5833299999999966 | 0.2500000000000000 | 0.0945999999999998 | F | F | F |
| 0.4166700000000034 | 0.7500000000000000 | 0.0945999999999998 | F | F | F |
| 0.3333299999999966 | 0.0000000000000000 | 0.0945999999999998 | F | F | F |
| 0.5000000000000000 | 0.5000000000000000 | 0.0945999999999998 | F | F | F |
| 0.8333299999999966 | 0.0000000000000000 | 0.0945999999999998 | F | F | F |
| 0.6666700000000034 | 0.5000000000000000 | 0.0945999999999998 | F | F | F |
| 0.7500000000000000 | 0.2500000000000000 | 0.0945999999999998 | F | F | F |
| 0.9166700000000034 | 0.7500000000000000 | 0.0945999999999998 | F | F | F |
| 0.9166700000000034 | 0.2500000000000000 | 0.0945999999999998 | F | F | F |
| 0.7500000000000000 | 0.7500000000000000 | 0.0945999999999998 | F | F | F |
| 0.6666700000000034 | 0.0000000000000000 | 0.0945999999999998 | F | F | F |
| 0.8333299999999966 | 0.5000000000000000 | 0.0945999999999998 | F | F | F |
| 0.0000238150302838 | 0.1671028649226784 | 0.1885748921599868 | T | T | T |
| 0.1665936245403827 | 0.6670683360081798 | 0.1885319661497157 | T | T | T |
| 0.2500222084682028 | 0.4170591126193141 | 0.1886169928364538 | T | T | T |
| 0.0831760561366053 | 0.9169809243275588 | 0.1885436380565207 | T | T | T |
| 0.0832935835877112 | 0.4171814744538916 | 0.1885130230139861 | T | T | T |
| 0.2497006466586636 | 0.9169481409084987 | 0.1885251836489669 | T | T | T |
| 0.1666039626816027 | 0.1668992771837426 | 0.1885468527953281 | T | T | T |
| 0.9999983138365167 | 0.6670965914447585 | 0.1885268073536261 | T | T | T |
| 0.3332174817888282 | 0.1667170452051621 | 0.1885014047074449 | T | T | T |
| 0.5000615691673038 | 0.6670762199845660 | 0.1883861959663276 | T | T | T |
| 0.5833568169871117 | 0.4170248906357255 | 0.1886534547323556 | T | T | T |
| 0.4165611419085847 | 0.9167402849727355 | 0.1883619926163373 | T | T | T |
| 0.4166721295990294 | 0.4169060343958282 | 0.1886556142053442 | T | T | T |
| 0.5835086133437165 | 0.9167977657678202 | 0.1884288241244942 | T | T | T |
| 0.5000037098329110 | 0.1665388023769087 | 0.1884382033119714 | T | T | T |

|                    |                    |                    |   |   |   |
|--------------------|--------------------|--------------------|---|---|---|
| 0.3332364160177936 | 0.6670516962943931 | 0.1884869908796180 | T | T | T |
| 0.6667613995771859 | 0.1668593556983180 | 0.1885263430534763 | T | T | T |
| 0.8334566876631565 | 0.6672266135254973 | 0.1884002134879020 | T | T | T |
| 0.9166708339627027 | 0.4172156126578448 | 0.1885286301582852 | T | T | T |
| 0.7502474390021556 | 0.9169824480640212 | 0.1884668777910781 | T | T | T |
| 0.7500402540610526 | 0.4171453204099538 | 0.1885126528505006 | T | T | T |
| 0.9167809322729830 | 0.9171139725930159 | 0.1885962950915345 | T | T | T |
| 0.8334172987403963 | 0.1671162050876022 | 0.1886007786784505 | T | T | T |
| 0.6667047313009768 | 0.6671624980168470 | 0.1885261054818041 | T | T | T |
| 0.1659113326874760 | 0.3331348322583530 | 0.2842525800347247 | T | T | T |
| 0.9999803695846630 | 0.8337312815858980 | 0.2844698383695450 | T | T | T |
| 0.2494004360105142 | 0.0833549296224490 | 0.2845742236079224 | T | T | T |
| 0.0829072644629701 | 0.5836537994792257 | 0.2843441543525219 | T | T | T |
| 0.0830679017855209 | 0.0833519324421606 | 0.2844963934028676 | T | T | T |
| 0.2492858827692757 | 0.5847077515062333 | 0.2842689863396666 | T | T | T |
| 0.9999047420144197 | 0.3334541694608993 | 0.2844126467160215 | T | T | T |
| 0.1662391024363118 | 0.8343053319587944 | 0.2845169906029729 | T | T | T |
| 0.5001742281439516 | 0.3315896809763305 | 0.2839573141876172 | T | T | T |
| 0.3329679177491182 | 0.8351798547238970 | 0.2843470945102245 | T | T | T |
| 0.5836540192869358 | 0.0831024576639195 | 0.2844820909686952 | T | T | T |
| 0.4165818809495471 | 0.5855390384569203 | 0.2841400703302882 | T | T | T |
| 0.4165017373141757 | 0.0828756286957355 | 0.2845148916406436 | T | T | T |
| 0.5838493179641601 | 0.5858713096470891 | 0.2842980587994501 | T | T | T |
| 0.3328436779848850 | 0.3319665959793123 | 0.2841422194793027 | T | T | T |
| 0.4999894377719399 | 0.8355169655058389 | 0.2842502603970086 | T | T | T |
| 0.8339019081137302 | 0.3333721500037868 | 0.2844271908543449 | T | T | T |
| 0.6671829468671192 | 0.8348827120970959 | 0.2844105131585158 | T | T | T |
| 0.9168272637939365 | 0.0835398568996673 | 0.2844727377133490 | T | T | T |
| 0.7506978788842189 | 0.5841927927871070 | 0.2841647408673453 | T | T | T |
| 0.7506100144741179 | 0.0830409955540141 | 0.2844952289098505 | T | T | T |
| 0.9167124508829505 | 0.5839615321023076 | 0.2843106433984445 | T | T | T |
| 0.6676591414386681 | 0.3325591205070623 | 0.2841508495708442 | T | T | T |
| 0.8335801622746697 | 0.8338900453186453 | 0.2844752529440955 | T | T | T |
| 0.4244264609045648 | 0.5014841873834991 | 0.4197451276729131 | T | T | T |
| 0.5018830235416064 | 0.4157793629251169 | 0.4200464223940076 | T | T | T |
| 0.3474698843955844 | 0.4141477660310817 | 0.4206995247187110 | T | T | T |
| 0.5788744110611886 | 0.5027811295245241 | 0.4189316588602543 | T | T | T |
| 0.2706300000214115 | 0.5015004706586712 | 0.4214109398910604 | T | T | T |
| 0.6557458636613862 | 0.4156546201506469 | 0.4201722530556812 | T | T | T |
| 0.4243852136265862 | 0.5754969044132833 | 0.4552158479593975 | T | T | T |
| 0.4236741498711322 | 0.5688269589217666 | 0.3812319294857913 | T | T | T |
| 0.5018564410676980 | 0.3444926302474139 | 0.3828079716182640 | T | T | T |
| 0.5025586383284069 | 0.3458766541578445 | 0.4568278506134226 | T | T | T |
| 0.3471012322546554 | 0.3443951455726992 | 0.3831458485594408 | T | T | T |
| 0.3484926918459250 | 0.3430888159880139 | 0.4570548445765030 | T | T | T |
| 0.5785461537299303 | 0.5688552313036047 | 0.3800813622820050 | T | T | T |
| 0.5786592902205773 | 0.5781044232729657 | 0.4538752016541583 | T | T | T |
| 0.2666551431415379 | 0.5659933092195443 | 0.4594202749432051 | T | T | T |
| 0.2163134937576056 | 0.4363162300288146 | 0.4187017327364740 | T | T | T |
| 0.2694387102827902 | 0.5743368477114303 | 0.3851611294081334 | T | T | T |
| 0.6609048691471626 | 0.3559526768434264 | 0.4593624486186253 | T | T | T |
| 0.6559030563742356 | 0.3384725726181890 | 0.3854155609860494 | T | T | T |
| 0.7099491819433098 | 0.4804694779031276 | 0.4154336205016146 | T | T | T |

**C<sub>8</sub>H<sub>18</sub>···Pt (111)**

**Energy: -6844.029836 eV**

1.0000000000000000  
16.5000000000000000 0.0000000000000000 0.0000000000000000  
0.0000000000000000 9.5261999999999993 0.0000000000000000  
0.0000000000000000 0.0000000000000000 23.7360000000000007

Pt C H  
96 8 18

Selective dynamics

Direct

|                    |                    |                    |   |   |   |
|--------------------|--------------------|--------------------|---|---|---|
| 0.1666700000000034 | 0.3333299999999966 | 0.0000000000000000 | F | F | F |
| 0.0000000000000000 | 0.8333299999999966 | 0.0000000000000000 | F | F | F |
| 0.2500000000000000 | 0.0833299999999966 | 0.0000000000000000 | F | F | F |
| 0.0833299999999966 | 0.5833299999999966 | 0.0000000000000000 | F | F | F |

|                    |                    |                    |       |
|--------------------|--------------------|--------------------|-------|
| 0.083329999999966  | 0.083329999999966  | 0.000000000000000  | F F F |
| 0.250000000000000  | 0.583329999999966  | 0.000000000000000  | F F F |
| 0.000000000000000  | 0.333329999999966  | 0.000000000000000  | F F F |
| 0.166670000000034  | 0.833329999999966  | 0.000000000000000  | F F F |
| 0.500000000000000  | 0.333329999999966  | 0.000000000000000  | F F F |
| 0.333329999999966  | 0.833329999999966  | 0.000000000000000  | F F F |
| 0.583329999999966  | 0.083329999999966  | 0.000000000000000  | F F F |
| 0.416670000000034  | 0.583329999999966  | 0.000000000000000  | F F F |
| 0.416670000000034  | 0.083329999999966  | 0.000000000000000  | F F F |
| 0.583329999999966  | 0.583329999999966  | 0.000000000000000  | F F F |
| 0.333329999999966  | 0.333329999999966  | 0.000000000000000  | F F F |
| 0.500000000000000  | 0.833329999999966  | 0.000000000000000  | F F F |
| 0.833329999999966  | 0.333329999999966  | 0.000000000000000  | F F F |
| 0.666670000000034  | 0.833329999999966  | 0.000000000000000  | F F F |
| 0.916670000000034  | 0.083329999999966  | 0.000000000000000  | F F F |
| 0.750000000000000  | 0.583329999999966  | 0.000000000000000  | F F F |
| 0.750000000000000  | 0.083329999999966  | 0.000000000000000  | F F F |
| 0.916670000000034  | 0.583329999999966  | 0.000000000000000  | F F F |
| 0.666670000000034  | 0.333329999999966  | 0.000000000000000  | F F F |
| 0.833329999999966  | 0.833329999999966  | 0.000000000000000  | F F F |
| 0.166670000000034  | 0.000000000000000  | 0.094599999999998  | F F F |
| 0.000000000000000  | 0.500000000000000  | 0.094599999999998  | F F F |
| 0.083329999999966  | 0.250000000000000  | 0.094599999999998  | F F F |
| 0.250000000000000  | 0.750000000000000  | 0.094599999999998  | F F F |
| 0.250000000000000  | 0.250000000000000  | 0.094599999999998  | F F F |
| 0.083329999999966  | 0.750000000000000  | 0.094599999999998  | F F F |
| 0.000000000000000  | 0.000000000000000  | 0.094599999999998  | F F F |
| 0.166670000000034  | 0.500000000000000  | 0.094599999999998  | F F F |
| 0.500000000000000  | 0.000000000000000  | 0.094599999999998  | F F F |
| 0.333329999999966  | 0.500000000000000  | 0.094599999999998  | F F F |
| 0.416670000000034  | 0.250000000000000  | 0.094599999999998  | F F F |
| 0.583329999999966  | 0.750000000000000  | 0.094599999999998  | F F F |
| 0.583329999999966  | 0.250000000000000  | 0.094599999999998  | F F F |
| 0.416670000000034  | 0.750000000000000  | 0.094599999999998  | F F F |
| 0.333329999999966  | 0.000000000000000  | 0.094599999999998  | F F F |
| 0.500000000000000  | 0.500000000000000  | 0.094599999999998  | F F F |
| 0.833329999999966  | 0.000000000000000  | 0.094599999999998  | F F F |
| 0.666670000000034  | 0.500000000000000  | 0.094599999999998  | F F F |
| 0.750000000000000  | 0.250000000000000  | 0.094599999999998  | F F F |
| 0.916670000000034  | 0.750000000000000  | 0.094599999999998  | F F F |
| 0.916670000000034  | 0.250000000000000  | 0.094599999999998  | F F F |
| 0.750000000000000  | 0.750000000000000  | 0.094599999999998  | F F F |
| 0.666670000000034  | 0.000000000000000  | 0.094599999999998  | F F F |
| 0.833329999999966  | 0.500000000000000  | 0.094599999999998  | F F F |
| 0.9990754349202232 | 0.1699553114550781 | 0.1887880590342148 | T T T |
| 0.1651320189446527 | 0.6697498316341385 | 0.1885955350141520 | T T T |
| 0.2488086385093723 | 0.4191423300958669 | 0.1885155977093860 | T T T |
| 0.0820850450388767 | 0.9200644508851433 | 0.1887705996861921 | T T T |
| 0.0822280810707434 | 0.4195904977945578 | 0.1885771805356426 | T T T |
| 0.2485714776057395 | 0.9192909200303182 | 0.1886307545011650 | T T T |
| 0.1657508097778949 | 0.1690943783510531 | 0.1886527108131056 | T T T |
| 0.9990970604435714 | 0.6701905722911796 | 0.1886826893991540 | T T T |
| 0.3323853228185205 | 0.1687217440845308 | 0.1884836650390403 | T T T |
| 0.4990353910955675 | 0.6698729357255720 | 0.1882016832900437 | T T T |
| 0.5824948791275941 | 0.4193636326836865 | 0.1882663401506481 | T T T |
| 0.4155173071667636 | 0.9189707811677277 | 0.1885074205937954 | T T T |
| 0.4154770972814482 | 0.4195007626247603 | 0.1884023525093070 | T T T |
| 0.5827253902322581 | 0.9187778364362165 | 0.1884981681658343 | T T T |
| 0.4990504942261375 | 0.1685456642886714 | 0.1883926972486452 | T T T |
| 0.3317876726594106 | 0.6698205017884120 | 0.1884138435472819 | T T T |
| 0.6658338833019819 | 0.1684622638581670 | 0.1883865704980550 | T T T |
| 0.8329988510628867 | 0.6697641493643476 | 0.1887830303377393 | T T T |
| 0.9159399849812786 | 0.4197862404572257 | 0.1887143919697288 | T T T |
| 0.7497592452157358 | 0.9191075669295433 | 0.1886368321813101 | T T T |
| 0.7494408382959663 | 0.4192975776826577 | 0.1885402336839542 | T T T |
| 0.9160068835769883 | 0.9201423371741341 | 0.1887485323518468 | T T T |
| 0.8325052956557562 | 0.1694053490061291 | 0.1886537955274597 | T T T |
| 0.6663899155551556 | 0.6694213608838893 | 0.1883991473179264 | T T T |
| 0.1637657621964127 | 0.3385950772542107 | 0.2842652649294845 | T T T |
| 0.9980542375118063 | 0.8392319802350584 | 0.2849566639726436 | T T T |

|                    |                    |                    |   |   |   |
|--------------------|--------------------|--------------------|---|---|---|
| 0.2473069757463521 | 0.0884753558835980 | 0.2847264833259138 | T | T | T |
| 0.0808843141354944 | 0.5892700126486664 | 0.2847296022220593 | T | T | T |
| 0.0811017387510519 | 0.0888879586728726 | 0.2849436810414099 | T | T | T |
| 0.2470229970096624 | 0.5903069189824147 | 0.2841200060377044 | T | T | T |
| 0.9980999882844835 | 0.3388501654715049 | 0.2848223047885462 | T | T | T |
| 0.1641958847149111 | 0.8397377137453950 | 0.2847978127186663 | T | T | T |
| 0.4979212193269556 | 0.3375480245273981 | 0.2834764110395798 | T | T | T |
| 0.3308770099935636 | 0.8404834203400645 | 0.2846350385215281 | T | T | T |
| 0.5815974908981429 | 0.0880082104612842 | 0.2844815115579491 | T | T | T |
| 0.4142368832750515 | 0.5914524301263915 | 0.2836534458274074 | T | T | T |
| 0.4144105456669147 | 0.0881002886874401 | 0.2845390199480940 | T | T | T |
| 0.5813266487373796 | 0.5909974822063490 | 0.2836504932023978 | T | T | T |
| 0.3306424540032504 | 0.3376197885111721 | 0.2839149515374933 | T | T | T |
| 0.4979560210989101 | 0.8407480690237885 | 0.2845603400115980 | T | T | T |
| 0.8320608330205863 | 0.3386560407919183 | 0.2843617688507794 | T | T | T |
| 0.6650468498723320 | 0.8404461475384046 | 0.2845281579938002 | T | T | T |
| 0.9150772128751742 | 0.0887228133620520 | 0.2849333639264443 | T | T | T |
| 0.7484839908741312 | 0.5908623040823385 | 0.2843731644890197 | T | T | T |
| 0.7485492623120626 | 0.0886584166545494 | 0.2846492919122482 | T | T | T |
| 0.9151118244843198 | 0.5894553334375477 | 0.2848166034681419 | T | T | T |
| 0.6648924915756459 | 0.3375219435293777 | 0.2835715938740630 | T | T | T |
| 0.8319408960367681 | 0.8399750440029429 | 0.2849090881645146 | T | T | T |
| 0.4957924567290234 | 0.4139215132098309 | 0.4202796103184464 | T | T | T |
| 0.5717500051064921 | 0.5039404551526662 | 0.4211207219089676 | T | T | T |
| 0.4174171353658194 | 0.4972811345759959 | 0.4208658504263359 | T | T | T |
| 0.6499770257707658 | 0.4201474335364589 | 0.4226392571242646 | T | T | T |
| 0.3413252414263286 | 0.4077910106261325 | 0.4193444707712297 | T | T | T |
| 0.7262337417756626 | 0.5093518728875922 | 0.4222685496299524 | T | T | T |
| 0.2636138665333352 | 0.4923676014712497 | 0.4223962535103320 | T | T | T |
| 0.8034565567871750 | 0.4233826746471146 | 0.4255680677546596 | T | T | T |
| 0.4966800097780615 | 0.3405979448605259 | 0.4559992742913607 | T | T | T |
| 0.4970019867078672 | 0.3462309314627779 | 0.3820049375735808 | T | T | T |
| 0.5695823610774658 | 0.5761541248584141 | 0.4571742386152499 | T | T | T |
| 0.5718852471242990 | 0.5724834190013827 | 0.3831280295196011 | T | T | T |
| 0.4167305930808756 | 0.5697357295546351 | 0.3840940079237581 | T | T | T |
| 0.4159474742433286 | 0.5656673146614812 | 0.4581135048253397 | T | T | T |
| 0.6514984928540800 | 0.3482192934863390 | 0.3858051784964516 | T | T | T |
| 0.6502335745417296 | 0.3514479429070216 | 0.4598157907003934 | T | T | T |
| 0.3430740762298167 | 0.3296870110138111 | 0.4532864145296308 | T | T | T |
| 0.3415955373600431 | 0.3449162884153981 | 0.3796429335931802 | T | T | T |
| 0.7240355840909564 | 0.5856665993768245 | 0.4568380174728165 | T | T | T |
| 0.7268274378478785 | 0.5733922619624258 | 0.3830848029104318 | T | T | T |
| 0.2592410617526854 | 0.5500800045942608 | 0.4620844600658468 | T | T | T |
| 0.2613280299476929 | 0.5705896552057476 | 0.3881686854776137 | T | T | T |
| 0.2100492550187056 | 0.4258823632488007 | 0.4181603407439198 | T | T | T |
| 0.8573840262326700 | 0.4893578903031286 | 0.4227408239838797 | T | T | T |
| 0.8062383247681090 | 0.3472227925462040 | 0.3906970812646277 | T | T | T |
| 0.8064028380065059 | 0.3635098446297418 | 0.4648068779693984 | T | T | T |

### C<sub>4</sub>H<sub>10</sub>···Pt (100)

Energy: -6758.763140 eV

1.0000000000000000

11.6672999999999991 0.0000000000000000 0.0000000000000000

0.0000000000000000 15.5564000000000000 0.0000000000000000

0.0000000000000000 0.0000000000000000 22.8336000000000006

Pt C H

96 4 10

Selective dynamics

Direct

0.0000000000000000 0.1250000000000000 0.0000000000000000 F F F

0.1666700000000003 0.0000000000000000 0.0000000000000000 F F F

0.0000000000000000 0.0000000000000000 0.0851600000000019 F F F

0.1666700000000003 0.1250000000000000 0.0851600000000019 F F F

0.0001378883916429 0.1250266948394504 0.1692840767659526 T T T

0.1666811043224261 0.0001713883616132 0.1693258625748461 T T T

0.0000508221893551 0.0001978015070625 0.2522043947102639 T T T

0.1665943141194408 0.1251190875011387 0.2522049429890707 T T T

0.3333299999999966 0.1250000000000000 0.0000000000000000 F F F

0.5000000000000000 0.0000000000000000 0.0000000000000000 F F F

|                     |                    |                    |   |   |   |
|---------------------|--------------------|--------------------|---|---|---|
| 0.3333299999999966  | 0.0000000000000000 | 0.0851600000000019 | F | F | F |
| 0.5000000000000000  | 0.1250000000000000 | 0.0851600000000019 | F | F | F |
| 0.3333397689540622  | 0.1251131997109369 | 0.1692257353946965 | T | T | T |
| 0.4999949016026504  | 0.0001821416489561 | 0.1693085626511036 | T | T | T |
| 0.3334303368342624  | 0.0003551503504360 | 0.2521605045969111 | T | T | T |
| 0.5000281268246478  | 0.1253704719598202 | 0.2521236464518086 | T | T | T |
| 0.6666700000000034  | 0.1250000000000000 | 0.0000000000000000 | F | F | F |
| 0.8333299999999966  | 0.0000000000000000 | 0.0000000000000000 | F | F | F |
| 0.6666700000000034  | 0.0000000000000000 | 0.0851600000000019 | F | F | F |
| 0.8333299999999966  | 0.1250000000000000 | 0.0851600000000019 | F | F | F |
| 0.6666093545370512  | 0.1250647971007091 | 0.1692359814728042 | T | T | T |
| 0.8333640235744310  | 0.0001397314554754 | 0.1692930530117555 | T | T | T |
| 0.6666008543993668  | 0.0003431811737637 | 0.2522239664028858 | T | T | T |
| 0.8335692374062665  | 0.1249968781540843 | 0.2521332719991868 | T | T | T |
| 0.0000000000000000  | 0.3750000000000000 | 0.0000000000000000 | F | F | F |
| 0.1666700000000034  | 0.2500000000000000 | 0.0000000000000000 | F | F | F |
| 0.0000000000000000  | 0.2500000000000000 | 0.0851600000000019 | F | F | F |
| 0.1666700000000034  | 0.3750000000000000 | 0.0851600000000019 | F | F | F |
| 0.0002206523459035  | 0.3749714893158556 | 0.1691817727342474 | T | T | T |
| 0.1667725942557497  | 0.2500853755653438 | 0.1692550253142177 | T | T | T |
| -0.0002302602101701 | 0.2500596150633173 | 0.2521242860466528 | T | T | T |
| 0.1662461778915620  | 0.3747619427813798 | 0.2522007136084339 | T | T | T |
| 0.3333299999999966  | 0.3750000000000000 | 0.0000000000000000 | F | F | F |
| 0.5000000000000000  | 0.2500000000000000 | 0.0000000000000000 | F | F | F |
| 0.3333299999999966  | 0.2500000000000000 | 0.0851600000000019 | F | F | F |
| 0.5000000000000000  | 0.3750000000000000 | 0.0851600000000019 | F | F | F |
| 0.3335012092243093  | 0.3753319831678418 | 0.1694993086466065 | T | T | T |
| 0.4998582367984491  | 0.2502577792129577 | 0.1692900734069404 | T | T | T |
| 0.3329373514380140  | 0.2499327337106543 | 0.2521899094299944 | T | T | T |
| 0.5001749012247586  | 0.3740125064487222 | 0.2530766070166788 | T | T | T |
| 0.6666700000000034  | 0.3750000000000000 | 0.0000000000000000 | F | F | F |
| 0.8333299999999966  | 0.2500000000000000 | 0.0000000000000000 | F | F | F |
| 0.6666700000000034  | 0.2500000000000000 | 0.0851600000000019 | F | F | F |
| 0.8333299999999966  | 0.3750000000000000 | 0.0851600000000019 | F | F | F |
| 0.6663303013504625  | 0.3750168118237764 | 0.1692432229377168 | T | T | T |
| 0.8333547639742572  | 0.2500478348236235 | 0.1692509798182144 | T | T | T |
| 0.6674032294408550  | 0.2497052283769050 | 0.2521535827329557 | T | T | T |
| 0.8332649336500685  | 0.3752857988538506 | 0.2519444090077126 | T | T | T |
| 0.0000000000000000  | 0.6250000000000000 | 0.0000000000000000 | F | F | F |
| 0.1666700000000034  | 0.5000000000000000 | 0.0000000000000000 | F | F | F |
| 0.0000000000000000  | 0.5000000000000000 | 0.0851600000000019 | F | F | F |
| 0.1666700000000034  | 0.6250000000000000 | 0.0851600000000019 | F | F | F |
| 0.0001518055316356  | 0.6252060821808765 | 0.1691316256615799 | T | T | T |
| 0.1672594190532169  | 0.5000635756049931 | 0.1693358099195915 | T | T | T |
| 0.0001940016922633  | 0.5001410442883090 | 0.2519016015104462 | T | T | T |
| 0.1657806882019361  | 0.6257437651960627 | 0.2521589135139822 | T | T | T |
| 0.3333299999999966  | 0.6250000000000000 | 0.0000000000000000 | F | F | F |
| 0.5000000000000000  | 0.5000000000000000 | 0.0000000000000000 | F | F | F |
| 0.3333299999999966  | 0.5000000000000000 | 0.0851600000000019 | F | F | F |
| 0.5000000000000000  | 0.6250000000000000 | 0.0851600000000019 | F | F | F |
| 0.3333135737637252  | 0.6247996024341759 | 0.1694465858194608 | T | T | T |
| 0.4993558268227640  | 0.4997992925562584 | 0.1696360886070848 | T | T | T |
| 0.3315996240212726  | 0.4999588815065129 | 0.2538846502983014 | T | T | T |
| 0.5017487989421184  | 0.6262743274535401 | 0.2513824561472930 | T | T | T |
| 0.6666700000000034  | 0.6250000000000000 | 0.0000000000000000 | F | F | F |
| 0.8333299999999966  | 0.5000000000000000 | 0.0000000000000000 | F | F | F |
| 0.6666700000000034  | 0.5000000000000000 | 0.0851600000000019 | F | F | F |
| 0.8333299999999966  | 0.6250000000000000 | 0.0851600000000019 | F | F | F |
| 0.6670909651368717  | 0.6252808986025098 | 0.1687319572456787 | T | T | T |
| 0.8338467929788214  | 0.4999245613924897 | 0.1689126190195183 | T | T | T |
| 0.6680501262981138  | 0.5006897949077791 | 0.2514343100373413 | T | T | T |
| 0.8336309312710974  | 0.6252725041698053 | 0.2518745427068231 | T | T | T |
| 0.0000000000000000  | 0.8750000000000000 | 0.0000000000000000 | F | F | F |
| 0.1666700000000034  | 0.7500000000000000 | 0.0000000000000000 | F | F | F |
| 0.0000000000000000  | 0.7500000000000000 | 0.0851600000000019 | F | F | F |
| 0.1666700000000034  | 0.8750000000000000 | 0.0851600000000019 | F | F | F |
| 0.0001456659560851  | 0.8752937277905245 | 0.1693072041575571 | T | T | T |
| 0.1667688561124188  | 0.7502078045058361 | 0.1691860089007164 | T | T | T |
| -0.0000477067989437 | 0.7504805750556247 | 0.2521235870685767 | T | T | T |
| 0.1667983868504984  | 0.8752523773216521 | 0.2521682160539964 | T | T | T |

|                    |                    |                    |   |   |   |
|--------------------|--------------------|--------------------|---|---|---|
| 0.3333299999999966 | 0.8750000000000000 | 0.0000000000000000 | F | F | F |
| 0.5000000000000000 | 0.7500000000000000 | 0.0000000000000000 | F | F | F |
| 0.3333299999999966 | 0.7500000000000000 | 0.0851600000000019 | F | F | F |
| 0.5000000000000000 | 0.8750000000000000 | 0.0851600000000019 | F | F | F |
| 0.3332405826617412 | 0.8753616328638723 | 0.1692035697413591 | T | T | T |
| 0.4998937110399362 | 0.7504981247381325 | 0.1688928590344431 | T | T | T |
| 0.3333498424684233 | 0.7504477151455657 | 0.2519691843835082 | T | T | T |
| 0.5000438518758769 | 0.8752319076830014 | 0.2520490712814176 | T | T | T |
| 0.6666700000000034 | 0.8750000000000000 | 0.0000000000000000 | F | F | F |
| 0.8333299999999966 | 0.7500000000000000 | 0.0000000000000000 | F | F | F |
| 0.6666700000000034 | 0.7500000000000000 | 0.0851600000000019 | F | F | F |
| 0.8333299999999966 | 0.8750000000000000 | 0.0851600000000019 | F | F | F |
| 0.6667876625501352 | 0.8753416372819932 | 0.1692966044310419 | T | T | T |
| 0.833532559556408  | 0.7504183156476523 | 0.1692764226028856 | T | T | T |
| 0.6670405927909944 | 0.7504586329828612 | 0.2519923306977969 | T | T | T |
| 0.8333934687626001 | 0.8754072968997223 | 0.2522048172219090 | T | T | T |
| 0.5174034081077692 | 0.5252428739805975 | 0.3958033689707577 | T | T | T |
| 0.3897889818909506 | 0.5434561494593422 | 0.3923565809885314 | T | T | T |
| 0.5458301694449962 | 0.4302109776921956 | 0.3935677198966095 | T | T | T |
| 0.3596442914690935 | 0.6380160655771752 | 0.3970016419841887 | T | T | T |
| 0.5518876992422765 | 0.5534822119423850 | 0.4362105027220619 | T | T | T |
| 0.5608574682165225 | 0.5591627736506005 | 0.3596263231263889 | T | T | T |
| 0.3569799647619409 | 0.5177184650988824 | 0.3494864090384733 | T | T | T |
| 0.3439297613463903 | 0.5062121182683388 | 0.4256958140613681 | T | T | T |
| 0.5687461187446471 | 0.3956614189519606 | 0.4306779217999214 | T | T | T |
| 0.5090053678135564 | 0.4004208015806685 | 0.3535400961476777 | T | T | T |
| 0.6379623090866053 | 0.4182713609844013 | 0.3926457346753053 | T | T | T |
| 0.3854737002061226 | 0.6641684256394159 | 0.4394903925417148 | T | T | T |
| 0.2676711146397217 | 0.6489300297533293 | 0.3914945738712441 | T | T | T |
| 0.4041263673733336 | 0.6754669109847152 | 0.3630729751387399 | T | T | T |

### C<sub>6</sub>H<sub>14</sub>···Pt (100)

Energy: -6793.790327 eV

1.0000000000000000

11.6672999999999991 0.0000000000000000 0.0000000000000000

0.0000000000000000 15.5564000000000000 0.0000000000000000

0.0000000000000000 0.0000000000000000 22.8336000000000006

Pt C H

96 6 14

Selective dynamics

Direct

|                    |                     |                    |   |   |   |
|--------------------|---------------------|--------------------|---|---|---|
| 0.0000000000000000 | 0.1250000000000000  | 0.0000000000000000 | F | F | F |
| 0.1666700000000034 | 0.0000000000000000  | 0.0000000000000000 | F | F | F |
| 0.0000000000000000 | 0.0000000000000000  | 0.0851600000000019 | F | F | F |
| 0.1666700000000034 | 0.1250000000000000  | 0.0851600000000019 | F | F | F |
| 0.0000117648038802 | 0.1247220551664570  | 0.1692511439477592 | T | T | T |
| 0.1667357173436733 | -0.0001783634339829 | 0.1693599403778204 | T | T | T |
| 0.0000662442832747 | -0.0004634027188262 | 0.2521238785672065 | T | T | T |
| 0.1663453213722229 | 0.1247141704027777  | 0.2522335249872686 | T | T | T |
| 0.3333299999999966 | 0.1250000000000000  | 0.0000000000000000 | F | F | F |
| 0.5000000000000000 | 0.0000000000000000  | 0.0000000000000000 | F | F | F |
| 0.3333299999999966 | 0.0000000000000000  | 0.0851600000000019 | F | F | F |
| 0.5000000000000000 | 0.1250000000000000  | 0.0851600000000019 | F | F | F |
| 0.3331749463713626 | 0.1246891921277690  | 0.1692097643303090 | T | T | T |
| 0.4998766343383514 | -0.0002022904785159 | 0.1692736304765906 | T | T | T |
| 0.333298296747108  | -0.0002986762952031 | 0.2522694859192759 | T | T | T |
| 0.4992253981068838 | 0.1245431463094158  | 0.2521743930661869 | T | T | T |
| 0.6666700000000034 | 0.1250000000000000  | 0.0000000000000000 | F | F | F |
| 0.8333299999999966 | 0.0000000000000000  | 0.0000000000000000 | F | F | F |
| 0.6666700000000034 | 0.0000000000000000  | 0.0851600000000019 | F | F | F |
| 0.8333299999999966 | 0.1250000000000000  | 0.0851600000000019 | F | F | F |
| 0.6663121836287077 | 0.1248150356171303  | 0.1692062870551807 | T | T | T |
| 0.8332541356333221 | -0.0001970161672776 | 0.1692087645089914 | T | T | T |
| 0.6665357217631720 | -0.0000613682154404 | 0.2521366472428562 | T | T | T |
| 0.8337176839761600 | 0.1243051000932828  | 0.2520945557592627 | T | T | T |
| 0.0000000000000000 | 0.3750000000000000  | 0.0000000000000000 | F | F | F |
| 0.1666700000000034 | 0.2500000000000000  | 0.0000000000000000 | F | F | F |
| 0.0000000000000000 | 0.2500000000000000  | 0.0851600000000019 | F | F | F |
| 0.1666700000000034 | 0.3750000000000000  | 0.0851600000000019 | F | F | F |



0.0008850196265446 0.3747704174015712 0.1687874590349405 T T T  
0.1668318572925811 0.2496188535083944 0.1691759872959221 T T T  
-0.0003328006245812 0.2496543516745365 0.2519474654801742 T T T  
0.1661565402041345 0.3740935573606979 0.2521585447733628 T T T  
0.3333299999999966 0.3750000000000000 0.0000000000000000 F F F  
0.5000000000000000 0.2500000000000000 0.0000000000000000 F F F  
0.3333299999999966 0.2500000000000000 0.0851600000000019 F F F  
0.5000000000000000 0.3750000000000000 0.0851600000000019 F F F  
0.3334771892739301 0.3748661247366642 0.1692889631327715 T T T  
0.4998663870721510 0.2498762277353718 0.1691995981496095 T T T  
0.3328196825372507 0.2494198938160045 0.2521509081707905 T T T  
0.4991474690867579 0.3734030721794623 0.2533305733766351 T T T  
0.6666700000000034 0.3750000000000000 0.0000000000000000 F F F  
0.8333299999999966 0.2500000000000000 0.0000000000000000 F F F  
0.6666700000000034 0.2500000000000000 0.0851600000000019 F F F  
0.8333299999999966 0.3750000000000000 0.0851600000000019 F F F  
0.6661874351347771 0.3746111371814254 0.1694958771471082 T T T  
0.8330420659658063 0.2496691118807635 0.1691514827244279 T T T  
0.6668159602058876 0.2482909715634767 0.2527761782318229 T T T  
0.8352659928754554 0.3753840955771155 0.2511036878248043 T T T  
0.0000000000000000 0.6250000000000000 0.0000000000000000 F F F  
0.1666700000000034 0.5000000000000000 0.0000000000000000 F F F  
0.0000000000000000 0.5000000000000000 0.0851600000000019 F F F  
0.1666700000000034 0.6250000000000000 0.0851600000000019 F F F  
0.0004373849379062 0.6250175244772812 0.1691310930031723 T T T  
0.1676834460920502 0.4998903025914686 0.1692612282867794 T T T  
0.0008864896806067 0.4999209222210778 0.2518253626332635 T T T  
0.1663605875663365 0.6252100839348876 0.2521842043800583 T T T  
0.3333299999999966 0.6250000000000000 0.0000000000000000 F F F  
0.5000000000000000 0.5000000000000000 0.0000000000000000 F F F  
0.3333299999999966 0.5000000000000000 0.0851600000000019 F F F  
0.5000000000000000 0.6250000000000000 0.0851600000000019 F F F  
0.3337124749041301 0.6244562414175476 0.1694487762513894 T T T  
0.4995757284205279 0.4994078445437234 0.1696314765811710 T T T  
0.3315529081987362 0.4991880075784321 0.2538050514223241 T T T  
0.5018499552518343 0.6258380395672870 0.2514886752110348 T T T  
0.6666700000000034 0.6250000000000000 0.0000000000000000 F F F  
0.8333299999999966 0.5000000000000000 0.0000000000000000 F F F  
0.6666700000000034 0.5000000000000000 0.0851600000000019 F F F  
0.8333299999999966 0.6250000000000000 0.0851600000000019 F F F  
0.6671290437662201 0.6251882188699608 0.1686762822746193 T T T  
0.8340642590923114 0.5000365643544394 0.1686570147374704 T T T  
0.6684351202714301 0.5008449251637821 0.2513454408147051 T T T  
0.8341570274648321 0.6249924550942397 0.2519407641870903 T T T  
0.0000000000000000 0.8750000000000000 0.0000000000000000 F F F  
0.1666700000000034 0.7500000000000000 0.0000000000000000 F F F  
0.0000000000000000 0.7500000000000000 0.0851600000000019 F F F  
0.1666700000000034 0.8750000000000000 0.0851600000000019 F F F  
0.0002612715008385 0.8748906612575771 0.1692725371062317 T T T  
0.1670807329258553 0.7498399150708589 0.1691613089173037 T T T  
0.0004207558212621 0.7498977986351352 0.2521594176573319 T T T  
0.1670408261719772 0.8746274348749560 0.2521129478594270 T T T  
0.3333299999999966 0.8750000000000000 0.0000000000000000 F F F  
0.5000000000000000 0.7500000000000000 0.0000000000000000 F F F  
0.3333299999999966 0.7500000000000000 0.0851600000000019 F F F  
0.5000000000000000 0.8750000000000000 0.0851600000000019 F F F  
0.3334604347558402 0.8750565126379030 0.1692525138318276 T T T  
0.50007922298029414 0.7502834925827938 0.1689653865665684 T T T  
0.3337151682416721 0.7497920190973746 0.2519770973508872 T T T  
0.5003215122010659 0.8747158930160477 0.2521866684818901 T T T  
0.6666700000000034 0.8750000000000000 0.0000000000000000 F F F  
0.8333299999999966 0.7500000000000000 0.0000000000000000 F F F  
0.6666700000000034 0.7500000000000000 0.0851600000000019 F F F  
0.8333299999999966 0.8750000000000000 0.0851600000000019 F F F  
0.6667679090458041 0.8750139858403397 0.1692621061864163 T T T  
0.8337421794848826 0.7501512446647369 0.1692589421641101 T T T  
0.6674398936471972 0.7500050625150515 0.2520598346305566 T T T  
0.8334528336242132 0.8748616061861150 0.2521257601508893 T T T  
0.5191862444376361 0.5099862483768280 0.3955427055640685 T T T  
0.5541857395824916 0.4161253612538394 0.3928515840891046 T T T

|                    |                    |                    |   |   |   |
|--------------------|--------------------|--------------------|---|---|---|
| 0.3911542098429361 | 0.5257211503655286 | 0.3914656397361238 | T | T | T |
| 0.6830674543006818 | 0.4026427474713287 | 0.3935129967046701 | T | T | T |
| 0.3589503431920427 | 0.6197826573808275 | 0.3970033284871106 | T | T | T |
| 0.7181402864337364 | 0.3087908351482744 | 0.3916223277560710 | T | T | T |
| 0.5514417221398984 | 0.5384663692131725 | 0.4363740838787909 | T | T | T |
| 0.5622049861062823 | 0.5452765451339997 | 0.3597458810489937 | T | T | T |
| 0.5192652070645092 | 0.3871724176909571 | 0.3515623440423889 | T | T | T |
| 0.5136230820531802 | 0.3798207048851731 | 0.4284596018104800 | T | T | T |
| 0.3601748024466038 | 0.5008242805209910 | 0.3479168950033462 | T | T | T |
| 0.3451366121675210 | 0.4867629370059005 | 0.4238557356933698 | T | T | T |
| 0.7204766799517978 | 0.4369304438239032 | 0.3557147965178611 | T | T | T |
| 0.7196724876973881 | 0.4333481274571251 | 0.4325208641281549 | T | T | T |
| 0.3839326698432586 | 0.6451331355073331 | 0.4398064429513018 | T | T | T |
| 0.2669230285068521 | 0.6298730334384756 | 0.3913813090153189 | T | T | T |
| 0.4030165563514743 | 0.6582028958360283 | 0.3634961357327000 | T | T | T |
| 0.6920363584464897 | 0.2743851011582798 | 0.4312010132275780 | T | T | T |
| 0.6761046738850228 | 0.2756802566484716 | 0.3543080476881335 | T | T | T |
| 0.8105175628951696 | 0.3009041850353976 | 0.3859273375320604 | T | T | T |

### C<sub>8</sub>H<sub>18</sub>···Pt (100)

Energy: -6828.828548 eV

1.0000000000000000

11.6672999999999991 0.0000000000000000 0.0000000000000000

0.0000000000000000 15.5564000000000000 0.0000000000000000

0.0000000000000000 0.0000000000000000 22.8336000000000006

Pt C H

96 8 18

Selective dynamics

Direct

|                    |                    |                    |   |   |   |
|--------------------|--------------------|--------------------|---|---|---|
| 0.0000000000000000 | 0.1250000000000000 | 0.0000000000000000 | F | F | F |
| 0.1666700000000034 | 0.0000000000000000 | 0.0000000000000000 | F | F | F |
| 0.0000000000000000 | 0.0000000000000000 | 0.0851600000000019 | F | F | F |
| 0.1666700000000034 | 0.1250000000000000 | 0.0851600000000019 | F | F | F |
| 0.0003537930286646 | 0.1250276876014230 | 0.1692792425886024 | T | T | T |
| 0.1668410167064555 | 0.0001971059829725 | 0.1691982213102288 | T | T | T |
| 0.0008624915790854 | 0.0000184874260672 | 0.2522336717575123 | T | T | T |
| 0.1672287691411449 | 0.1251135410385084 | 0.2520658088082888 | T | T | T |
| 0.3333299999999966 | 0.1250000000000000 | 0.0000000000000000 | F | F | F |
| 0.5000000000000000 | 0.0000000000000000 | 0.0000000000000000 | F | F | F |
| 0.3333299999999966 | 0.0000000000000000 | 0.0851600000000019 | F | F | F |
| 0.5000000000000000 | 0.1250000000000000 | 0.0851600000000019 | F | F | F |
| 0.3338316642187307 | 0.1251280294917034 | 0.1691898605052617 | T | T | T |
| 0.5004156537603995 | 0.0002981927843737 | 0.1692113540137842 | T | T | T |
| 0.3337427706847664 | 0.0001039028014930 | 0.2520461206007014 | T | T | T |
| 0.5001422311489211 | 0.1250261683695559 | 0.2521989729171599 | T | T | T |
| 0.6666700000000034 | 0.1250000000000000 | 0.0000000000000000 | F | F | F |
| 0.8333299999999966 | 0.0000000000000000 | 0.0000000000000000 | F | F | F |
| 0.6666700000000034 | 0.0000000000000000 | 0.0851600000000019 | F | F | F |
| 0.8333299999999966 | 0.1250000000000000 | 0.0851600000000019 | F | F | F |
| 0.6669792615612434 | 0.1251905437044473 | 0.1693606929578309 | T | T | T |
| 0.8337670143891800 | 0.0001312728608123 | 0.1693508708842957 | T | T | T |
| 0.6671289161594297 | 0.0004746921665717 | 0.2521911950690172 | T | T | T |
| 0.8346527310864391 | 0.1248000701880755 | 0.2522768241131161 | T | T | T |
| 0.0000000000000000 | 0.3750000000000000 | 0.0000000000000000 | F | F | F |
| 0.1666700000000034 | 0.2500000000000000 | 0.0000000000000000 | F | F | F |
| 0.0000000000000000 | 0.2500000000000000 | 0.0851600000000019 | F | F | F |
| 0.1666700000000034 | 0.3750000000000000 | 0.0851600000000019 | F | F | F |
| 0.0010691617367758 | 0.3750413393171714 | 0.1689380171434052 | T | T | T |
| 0.1673711103478818 | 0.2499932689019283 | 0.1691629009878574 | T | T | T |
| 0.0005488988267849 | 0.2501405091495020 | 0.2519510711526980 | T | T | T |
| 0.1671447881880324 | 0.3746254429822419 | 0.2521353481208570 | T | T | T |
| 0.3333299999999966 | 0.3750000000000000 | 0.0000000000000000 | F | F | F |
| 0.5000000000000000 | 0.2500000000000000 | 0.0000000000000000 | F | F | F |
| 0.3333299999999966 | 0.2500000000000000 | 0.0851600000000019 | F | F | F |
| 0.5000000000000000 | 0.3750000000000000 | 0.0851600000000019 | F | F | F |
| 0.3339646742138612 | 0.3751975528091833 | 0.1693284356280946 | T | T | T |
| 0.5004337844704972 | 0.2502599127127009 | 0.1693724847010337 | T | T | T |
| 0.3337741342191611 | 0.2499068641697765 | 0.2521220765561618 | T | T | T |
| 0.5003803489734882 | 0.3739874022257291 | 0.2535051229910635 | T | T | T |

|                     |                    |                    |       |
|---------------------|--------------------|--------------------|-------|
| 0.66667000000000034 | 0.3750000000000000 | 0.0000000000000000 | F F F |
| 0.8333299999999996  | 0.2500000000000000 | 0.0000000000000000 | F F F |
| 0.66667000000000034 | 0.2500000000000000 | 0.0851600000000019 | F F F |
| 0.8333299999999996  | 0.3750000000000000 | 0.0851600000000019 | F F F |
| 0.6664945851578850  | 0.3749281373546725 | 0.1694777914727713 | T T T |
| 0.8335227887914548  | 0.2499178406242182 | 0.1691964498588156 | T T T |
| 0.6677259173063008  | 0.2488687661740178 | 0.2528852328302627 | T T T |
| 0.8348489030436012  | 0.3753719889137749 | 0.2513453913722369 | T T T |
| 0.0000000000000000  | 0.6250000000000000 | 0.0000000000000000 | F F F |
| 0.16667000000000034 | 0.5000000000000000 | 0.0000000000000000 | F F F |
| 0.0000000000000000  | 0.5000000000000000 | 0.0851600000000019 | F F F |
| 0.16667000000000034 | 0.6250000000000000 | 0.0851600000000019 | F F F |
| 0.0012779101950227  | 0.6252328811617753 | 0.1694727181126734 | T T T |
| 0.1676245489033826  | 0.5002665843993414 | 0.1695417624450949 | T T T |
| 0.0003986668615814  | 0.4995523408028155 | 0.2520969565421356 | T T T |
| 0.1650395262135483  | 0.6251852293657544 | 0.2539836342463648 | T T T |
| 0.3333299999999996  | 0.6250000000000000 | 0.0000000000000000 | F F F |
| 0.5000000000000000  | 0.5000000000000000 | 0.0000000000000000 | F F F |
| 0.3333299999999996  | 0.5000000000000000 | 0.0851600000000019 | F F F |
| 0.5000000000000000  | 0.6250000000000000 | 0.0851600000000019 | F F F |
| 0.3328738064969576  | 0.6247751169114989 | 0.1697331314810753 | T T T |
| 0.4996839802191387  | 0.4999151710339872 | 0.1694751299801785 | T T T |
| 0.3332456732032990  | 0.4990680542087564 | 0.2537565877726143 | T T T |
| 0.5014160420990829  | 0.6262390095796470 | 0.2514681822364904 | T T T |
| 0.66667000000000034 | 0.6250000000000000 | 0.0000000000000000 | F F F |
| 0.8333299999999996  | 0.5000000000000000 | 0.0000000000000000 | F F F |
| 0.66667000000000034 | 0.5000000000000000 | 0.0851600000000019 | F F F |
| 0.8333299999999996  | 0.6250000000000000 | 0.0851600000000019 | F F F |
| 0.6671916015598585  | 0.6253253214563801 | 0.1687675034156548 | T T T |
| 0.8342075081164082  | 0.5002607214696790 | 0.1687852701418175 | T T T |
| 0.6684180234817546  | 0.5012672102525180 | 0.2513623384320971 | T T T |
| 0.8343424714207309  | 0.6253960018998892 | 0.2519435990969168 | T T T |
| 0.0000000000000000  | 0.8750000000000000 | 0.0000000000000000 | F F F |
| 0.16667000000000034 | 0.7500000000000000 | 0.0000000000000000 | F F F |
| 0.0000000000000000  | 0.7500000000000000 | 0.0851600000000019 | F F F |
| 0.16667000000000034 | 0.8750000000000000 | 0.0851600000000019 | F F F |
| 0.0003397640256772  | 0.8750929043362536 | 0.1693124676228188 | T T T |
| 0.1669148862699107  | 0.7498455636077709 | 0.1695553585928934 | T T T |
| -0.0002082680697666 | 0.7509602399599434 | 0.2524131045111538 | T T T |
| 0.1673006363343673  | 0.8754083797074392 | 0.2520528478904238 | T T T |
| 0.3333299999999996  | 0.8750000000000000 | 0.0000000000000000 | F F F |
| 0.5000000000000000  | 0.7500000000000000 | 0.0000000000000000 | F F F |
| 0.3333299999999996  | 0.7500000000000000 | 0.0851600000000019 | F F F |
| 0.5000000000000000  | 0.8750000000000000 | 0.0851600000000019 | F F F |
| 0.3334790580351833  | 0.8754373245649647 | 0.1689541909838785 | T T T |
| 0.5003026404343994  | 0.7503600586794350 | 0.1687419514515072 | T T T |
| 0.3352432359855557  | 0.7513952055842174 | 0.2516059223710280 | T T T |
| 0.5007687935433728  | 0.8755441279431861 | 0.2519813672678510 | T T T |
| 0.66667000000000034 | 0.8750000000000000 | 0.0000000000000000 | F F F |
| 0.8333299999999996  | 0.7500000000000000 | 0.0000000000000000 | F F F |
| 0.66667000000000034 | 0.7500000000000000 | 0.0851600000000019 | F F F |
| 0.8333299999999996  | 0.8750000000000000 | 0.0851600000000019 | F F F |
| 0.6671439637162428  | 0.8754072481923775 | 0.1692751210991869 | T T T |
| 0.8338766649847564  | 0.7502927532582001 | 0.1692753638808806 | T T T |
| 0.6672490581420365  | 0.7503126100436929 | 0.2519529986650875 | T T T |
| 0.8334712847547071  | 0.8754706423233362 | 0.2522567634158931 | T T T |
| 0.3913952441262670  | 0.5323461186204655 | 0.3934973816370268 | T T T |
| 0.5189343826153212  | 0.5143768425187613 | 0.3977701347477449 | T T T |
| 0.3624658057051435  | 0.6271891585640821 | 0.3979893268202944 | T T T |
| 0.5508052606216295  | 0.4199812881936542 | 0.3942409647643463 | T T T |
| 0.236077787769617   | 0.6483455563868535 | 0.3920852510952245 | T T T |
| 0.6791474415881730  | 0.4041418822164520 | 0.3964537137864971 | T T T |
| 0.2114602002816025  | 0.7437528055101928 | 0.3974983226855411 | T T T |
| 0.7110569003869158  | 0.3096359602834381 | 0.3950590088762929 | T T T |
| 0.3442500946001940  | 0.4953933272466760 | 0.4265448799967885 | T T T |
| 0.3594421024185553  | 0.5075087042034656 | 0.3502826749057297 | T T T |
| 0.5517060506926798  | 0.5410731414475878 | 0.4390499601186162 | T T T |
| 0.5634602604612501  | 0.5496761975498701 | 0.3625322667426301 | T T T |
| 0.4105375153658402  | 0.6625556085886446 | 0.3640683393365124 | T T T |
| 0.3935819317000301  | 0.6520117028502358 | 0.4401487009641067 | T T T |

|                    |                    |                    |   |   |   |
|--------------------|--------------------|--------------------|---|---|---|
| 0.5169849530584213 | 0.3929469589957233 | 0.3521922000140840 | T | T | T |
| 0.5073690334059056 | 0.3835139566940897 | 0.4288908416320451 | T | T | T |
| 0.1854814070215828 | 0.6115338070838392 | 0.4237992721534780 | T | T | T |
| 0.2058334387458783 | 0.6252453172619741 | 0.3481092112632244 | T | T | T |
| 0.7147575794638340 | 0.4341394477798471 | 0.4359463463999600 | T | T | T |
| 0.7197222340070634 | 0.4375171120415633 | 0.3591643550017248 | T | T | T |
| 0.2340699056986967 | 0.7674273431937636 | 0.4410880946898909 | T | T | T |
| 0.2622672827491069 | 0.7803189408263735 | 0.3655602572490573 | T | T | T |
| 0.1212655361544595 | 0.7584323536896034 | 0.3893659777636058 | T | T | T |
| 0.8037737958838734 | 0.3000065451641644 | 0.3934490393794146 | T | T | T |
| 0.6746556947400896 | 0.2782417753741656 | 0.3556663235595163 | T | T | T |
| 0.6770974217052455 | 0.2750979383028840 | 0.4330060109504903 | T | T | T |

**C<sub>6</sub>H<sub>14</sub>···Pt (111) with 1 ML H (24H)**

**Energy: -6899.905497 eV**

|                     |                    |                     |
|---------------------|--------------------|---------------------|
| 1.0000000000000000  |                    |                     |
| 16.5000000000000000 | 0.0000000000000000 | 0.0000000000000000  |
| 0.0000000000000000  | 9.5261999999999993 | 0.0000000000000000  |
| 0.0000000000000000  | 0.0000000000000000 | 23.7360000000000007 |

Pt H C

96 38 6

Selective dynamics

Direct

|                    |                    |                    |   |   |   |
|--------------------|--------------------|--------------------|---|---|---|
| 0.1666700000000034 | 0.3333299999999966 | 0.0000000000000000 | F | F | F |
| 0.0000000000000000 | 0.8333299999999966 | 0.0000000000000000 | F | F | F |
| 0.2500000000000000 | 0.0833299999999966 | 0.0000000000000000 | F | F | F |
| 0.0833299999999966 | 0.5833299999999966 | 0.0000000000000000 | F | F | F |
| 0.0833299999999966 | 0.0833299999999966 | 0.0000000000000000 | F | F | F |
| 0.2500000000000000 | 0.5833299999999966 | 0.0000000000000000 | F | F | F |
| 0.0000000000000000 | 0.3333299999999966 | 0.0000000000000000 | F | F | F |
| 0.1666700000000034 | 0.8333299999999966 | 0.0000000000000000 | F | F | F |
| 0.1666700000000034 | 0.0000000000000000 | 0.0945999999999998 | F | F | F |
| 0.0000000000000000 | 0.5000000000000000 | 0.0945999999999998 | F | F | F |
| 0.0833299999999966 | 0.2500000000000000 | 0.0945999999999998 | F | F | F |
| 0.2500000000000000 | 0.7500000000000000 | 0.0945999999999998 | F | F | F |
| 0.2500000000000000 | 0.2500000000000000 | 0.0945999999999998 | F | F | F |
| 0.0833299999999966 | 0.7500000000000000 | 0.0945999999999998 | F | F | F |
| 0.0000000000000000 | 0.0000000000000000 | 0.0945999999999998 | F | F | F |
| 0.1666700000000034 | 0.5000000000000000 | 0.0945999999999998 | F | F | F |
| 0.001942496478747  | 0.1665560879198682 | 0.1898454442508636 | T | T | T |
| 0.1665434247507767 | 0.6668203952158970 | 0.1897357151073645 | T | T | T |
| 0.2499621219533887 | 0.4164110197294582 | 0.1896017873642355 | T | T | T |
| 0.0835342061218982 | 0.9166389984303547 | 0.1898464903244493 | T | T | T |
| 0.0834376260092130 | 0.4165629101013120 | 0.1898918491478229 | T | T | T |
| 0.2501927562851177 | 0.9165421653378230 | 0.1898989227642736 | T | T | T |
| 0.1668566961886818 | 0.1664846464370136 | 0.1898753267996197 | T | T | T |
| 0.0000844178075485 | 0.6665730941988249 | 0.1898712826894854 | T | T | T |
| 0.1668628871339110 | 0.3328545979728687 | 0.2901630705780273 | T | T | T |
| 0.0002084059517230 | 0.8330134018312679 | 0.2899245400548852 | T | T | T |
| 0.2501264411474113 | 0.0829840703313181 | 0.2900288918431195 | T | T | T |
| 0.0835830740149863 | 0.5829740151783492 | 0.2901024065460893 | T | T | T |
| 0.0835352713307098 | 0.0829905622738170 | 0.2898750298954809 | T | T | T |
| 0.2501941114368302 | 0.5831094235431049 | 0.2889050441117939 | T | T | T |
| 0.0003037689932831 | 0.3329703947017250 | 0.2899439137526263 | T | T | T |
| 0.1668393074236963 | 0.8329891823939970 | 0.2901045284091311 | T | T | T |
| 0.5000000000000000 | 0.3333299999999966 | 0.0000000000000000 | F | F | F |
| 0.3333299999999966 | 0.8333299999999966 | 0.0000000000000000 | F | F | F |
| 0.5833299999999966 | 0.0833299999999966 | 0.0000000000000000 | F | F | F |
| 0.4166700000000034 | 0.5833299999999966 | 0.0000000000000000 | F | F | F |
| 0.4166700000000034 | 0.0833299999999966 | 0.0000000000000000 | F | F | F |
| 0.5833299999999966 | 0.5833299999999966 | 0.0000000000000000 | F | F | F |
| 0.3333299999999966 | 0.3333299999999966 | 0.0000000000000000 | F | F | F |
| 0.5000000000000000 | 0.8333299999999966 | 0.0000000000000000 | F | F | F |
| 0.5000000000000000 | 0.0000000000000000 | 0.0945999999999998 | F | F | F |
| 0.3333299999999966 | 0.5000000000000000 | 0.0945999999999998 | F | F | F |
| 0.4166700000000034 | 0.2500000000000000 | 0.0945999999999998 | F | F | F |
| 0.5833299999999966 | 0.7500000000000000 | 0.0945999999999998 | F | F | F |
| 0.5833299999999966 | 0.2500000000000000 | 0.0945999999999998 | F | F | F |
| 0.4166700000000034 | 0.7500000000000000 | 0.0945999999999998 | F | F | F |

|                    |                    |                    |   |   |   |
|--------------------|--------------------|--------------------|---|---|---|
| 0.3333299999999966 | 0.0000000000000000 | 0.0945999999999998 | F | F | F |
| 0.5000000000000000 | 0.5000000000000000 | 0.0945999999999998 | F | F | F |
| 0.3335475111811756 | 0.1661499625083875 | 0.1897664663044066 | T | T | T |
| 0.5001813367438330 | 0.6668514033144196 | 0.1897541978181546 | T | T | T |
| 0.5835049672991601 | 0.4165640628130793 | 0.1896215752721535 | T | T | T |
| 0.4169219486206774 | 0.9165414204219666 | 0.1898953050529016 | T | T | T |
| 0.4168522581543043 | 0.4166376567430078 | 0.1896389587820027 | T | T | T |
| 0.5835451386748268 | 0.9165171404698813 | 0.1899026995483378 | T | T | T |
| 0.5001528233992901 | 0.1663003636609677 | 0.1898368976120425 | T | T | T |
| 0.3334917164001917 | 0.6668709668813839 | 0.1896770951618146 | T | T | T |
| 0.5003738938171578 | 0.3325732831405476 | 0.2895162299438053 | T | T | T |
| 0.3335291825247206 | 0.8332200649406859 | 0.2900763700210331 | T | T | T |
| 0.5836005281149660 | 0.0829456213316176 | 0.2900914808634374 | T | T | T |
| 0.4168967702293874 | 0.5831183705309683 | 0.2895407239159061 | T | T | T |
| 0.4168972603889378 | 0.0829128157534642 | 0.2900879687413113 | T | T | T |
| 0.5837425522997943 | 0.5831628048318436 | 0.2892730170444194 | T | T | T |
| 0.3335259211622930 | 0.3327529829319106 | 0.2890369975641029 | T | T | T |
| 0.5002763870066947 | 0.8331859116013461 | 0.2900680999125921 | T | T | T |
| 0.8333299999999966 | 0.3333299999999966 | 0.0000000000000000 | F | F | F |
| 0.6666700000000034 | 0.8333299999999966 | 0.0000000000000000 | F | F | F |
| 0.9166700000000034 | 0.0833299999999966 | 0.0000000000000000 | F | F | F |
| 0.7500000000000000 | 0.5833299999999966 | 0.0000000000000000 | F | F | F |
| 0.7500000000000000 | 0.0833299999999966 | 0.0000000000000000 | F | F | F |
| 0.9166700000000034 | 0.5833299999999966 | 0.0000000000000000 | F | F | F |
| 0.6666700000000034 | 0.3333299999999966 | 0.0000000000000000 | F | F | F |
| 0.8333299999999966 | 0.8333299999999966 | 0.0000000000000000 | F | F | F |
| 0.8333299999999966 | 0.0000000000000000 | 0.0945999999999998 | F | F | F |
| 0.6666700000000034 | 0.5000000000000000 | 0.0945999999999998 | F | F | F |
| 0.7500000000000000 | 0.2500000000000000 | 0.0945999999999998 | F | F | F |
| 0.9166700000000034 | 0.7500000000000000 | 0.0945999999999998 | F | F | F |
| 0.9166700000000034 | 0.2500000000000000 | 0.0945999999999998 | F | F | F |
| 0.7500000000000000 | 0.7500000000000000 | 0.0945999999999998 | F | F | F |
| 0.6666700000000034 | 0.0000000000000000 | 0.0945999999999998 | F | F | F |
| 0.8333299999999966 | 0.5000000000000000 | 0.0945999999999998 | F | F | F |
| 0.6668128307141350 | 0.1662791524400746 | 0.1897807731380112 | T | T | T |
| 0.8334755676255415 | 0.6666061115112404 | 0.1898977226718727 | T | T | T |
| 0.9168292583262196 | 0.4165066470982363 | 0.1898537587198630 | T | T | T |
| 0.7502067041668518 | 0.9165788880944052 | 0.1898625574734223 | T | T | T |
| 0.7502869268719419 | 0.4167232662708204 | 0.1897985302995778 | T | T | T |
| 0.9168399391746659 | 0.9166190204788840 | 0.1898330603774269 | T | T | T |
| 0.8334645304433523 | 0.1665749776371738 | 0.1898547271981555 | T | T | T |
| 0.6670022843207288 | 0.6667107360413804 | 0.1898134777366544 | T | T | T |
| 0.8336641583703489 | 0.3328810498353015 | 0.2900424616612705 | T | T | T |
| 0.6669644371433819 | 0.8329924454566748 | 0.2900465205551789 | T | T | T |
| 0.9168918765088017 | 0.0830477253352877 | 0.2899127799245660 | T | T | T |
| 0.7502957273988065 | 0.5829021233360764 | 0.2903067426600494 | T | T | T |
| 0.7503029060465766 | 0.0829325293196888 | 0.2900128420862142 | T | T | T |
| 0.9170017865626486 | 0.5829240026157056 | 0.2898580425425048 | T | T | T |
| 0.6671379870952923 | 0.3328311957874884 | 0.2892223208997197 | T | T | T |
| 0.8335970911191209 | 0.8329199087136132 | 0.2898983052279425 | T | T | T |
| 0.0834948645952919 | 0.4165184495467512 | 0.3289968984257450 | T | T | T |
| 0.2493782278207190 | 0.4156755383240801 | 0.3281275543605216 | T | T | T |
| 0.1662578858748040 | 0.6668429381660436 | 0.3286616661216908 | T | T | T |
| 0.0001832697928916 | 0.6663868648013086 | 0.3288368165485832 | T | T | T |
| 0.1669852846353817 | 0.1664216576594217 | 0.3289578218269172 | T | T | T |
| 0.0002477495828050 | 0.1663385798257973 | 0.3288258716687857 | T | T | T |
| 0.0835261174622552 | 0.9164398516949491 | 0.3288949346010883 | T | T | T |
| 0.2501457064982049 | 0.9161376038133884 | 0.3289649426255238 | T | T | T |
| 0.4173771518763561 | 0.4172944034544352 | 0.3277717379822171 | T | T | T |
| 0.5833745677579181 | 0.4160607093829083 | 0.3278708956473758 | T | T | T |
| 0.5001175863830152 | 0.6678193821631068 | 0.3283063910700042 | T | T | T |
| 0.3339162160326705 | 0.6676184995933084 | 0.3282043114808833 | T | T | T |
| 0.5002137216126369 | 0.1652317189003801 | 0.3288306889467730 | T | T | T |
| 0.3336117866097563 | 0.1646185859545173 | 0.3286172652768830 | T | T | T |
| 0.4168617145068154 | 0.9163207091412068 | 0.3291002394694434 | T | T | T |
| 0.5835376805192048 | 0.9161478603470763 | 0.3289850849810514 | T | T | T |
| 0.7505890931694010 | 0.4169824986252680 | 0.3287876873506656 | T | T | T |
| 0.9167975868309907 | 0.4163020162786633 | 0.3288831886362076 | T | T | T |
| 0.8335619292519123 | 0.6663325153931230 | 0.3288741352743252 | T | T | T |
| 0.6676062169234280 | 0.6668470120823743 | 0.3288011324254628 | T | T | T |

|                    |                    |                    |   |   |   |
|--------------------|--------------------|--------------------|---|---|---|
| 0.8335328587514476 | 0.1664299047243666 | 0.3289048899297236 | T | T | T |
| 0.6669763446892966 | 0.1651157563259150 | 0.3286612978024053 | T | T | T |
| 0.7502302354790292 | 0.9164453833157374 | 0.3289283249906427 | T | T | T |
| 0.9168591171182986 | 0.9162903248261023 | 0.3287660243759237 | T | T | T |
| 0.4213275427228336 | 0.5659008954030905 | 0.4925683756620474 | T | T | T |
| 0.4252533326372943 | 0.5720298333807035 | 0.4187781023028577 | T | T | T |
| 0.5000949545900951 | 0.3396806492518514 | 0.4191648997511875 | T | T | T |
| 0.5011871690179754 | 0.3448118853215464 | 0.4930299193004692 | T | T | T |
| 0.3484298174264713 | 0.3483718212050194 | 0.4126336845134955 | T | T | T |
| 0.3447603791152843 | 0.3368549444219254 | 0.4862151904828261 | T | T | T |
| 0.5766721609304311 | 0.5645925039121402 | 0.4152584973032657 | T | T | T |
| 0.5780357617190018 | 0.5731518844500070 | 0.4889943673022087 | T | T | T |
| 0.2635404742654728 | 0.5585537199614670 | 0.4909945291627931 | T | T | T |
| 0.2155734594923531 | 0.4368968327950444 | 0.4455948268012417 | T | T | T |
| 0.2713841509531574 | 0.5783595658332465 | 0.4173097097482395 | T | T | T |
| 0.6592017174356457 | 0.3520377922293963 | 0.4937973134547416 | T | T | T |
| 0.6537954025215715 | 0.3341375113516371 | 0.4199150033260245 | T | T | T |
| 0.7086949499769186 | 0.4748663678421174 | 0.4497906332802845 | T | T | T |
| 0.4234254051307805 | 0.4993814835822575 | 0.4548229112938503 | T | T | T |
| 0.5005262649041420 | 0.4117877595373513 | 0.4554031413742092 | T | T | T |
| 0.3464304298824419 | 0.4120029532176409 | 0.4512533140181441 | T | T | T |
| 0.5775553817028085 | 0.4994929561822710 | 0.4534897801973520 | T | T | T |
| 0.2699281708212661 | 0.5009043920549686 | 0.4514171473016795 | T | T | T |
| 0.6541410407958386 | 0.4107049793056421 | 0.4543627578576661 | T | T | T |

### C<sub>6</sub>H<sub>14</sub>···Pt (111) with 16H

Energy: -6870.986720 eV

1.0000000000000000

16.5000000000000000 0.0000000000000000 0.0000000000000000

0.0000000000000000 9.5261999999999993 0.0000000000000000

0.0000000000000000 0.0000000000000000 23.7360000000000007

Pt H C

96 30 6

Selective dynamics

Direct

|                    |                    |                    |   |   |   |
|--------------------|--------------------|--------------------|---|---|---|
| 0.1666700000000034 | 0.3333299999999966 | 0.0000000000000000 | F | F | F |
| 0.0000000000000000 | 0.8333299999999966 | 0.0000000000000000 | F | F | F |
| 0.2500000000000000 | 0.0833299999999966 | 0.0000000000000000 | F | F | F |
| 0.0833299999999966 | 0.5833299999999966 | 0.0000000000000000 | F | F | F |
| 0.0833299999999966 | 0.0833299999999966 | 0.0000000000000000 | F | F | F |
| 0.2500000000000000 | 0.5833299999999966 | 0.0000000000000000 | F | F | F |
| 0.0000000000000000 | 0.3333299999999966 | 0.0000000000000000 | F | F | F |
| 0.1666700000000034 | 0.8333299999999966 | 0.0000000000000000 | F | F | F |
| 0.1666700000000034 | 0.0000000000000000 | 0.0945999999999998 | F | F | F |
| 0.0000000000000000 | 0.5000000000000000 | 0.0945999999999998 | F | F | F |
| 0.0833299999999966 | 0.2500000000000000 | 0.0945999999999998 | F | F | F |
| 0.2500000000000000 | 0.7500000000000000 | 0.0945999999999998 | F | F | F |
| 0.2500000000000000 | 0.2500000000000000 | 0.0945999999999998 | F | F | F |
| 0.0833299999999966 | 0.7500000000000000 | 0.0945999999999998 | F | F | F |
| 0.0000000000000000 | 0.0000000000000000 | 0.0945999999999998 | F | F | F |
| 0.1666700000000034 | 0.5000000000000000 | 0.0945999999999998 | F | F | F |
| 0.0003546557834575 | 0.1698069757002170 | 0.1908197264907529 | T | T | T |
| 0.1633751840643158 | 0.6716154786162917 | 0.1883134321929724 | T | T | T |
| 0.2479348812057837 | 0.4186214094110323 | 0.1873929292668706 | T | T | T |
| 0.0841555868568137 | 0.9224318237838954 | 0.1908205232022539 | T | T | T |
| 0.0818737301416662 | 0.4178312846949653 | 0.1900633779728004 | T | T | T |
| 0.2515967471083990 | 0.9205477153040615 | 0.1908699775914177 | T | T | T |
| 0.1683761465900002 | 0.1679010579160763 | 0.1904909573544108 | T | T | T |
| 0.9991876436806658 | 0.6718347514885782 | 0.1904512285098024 | T | T | T |
| 0.170553884039162  | 0.3484575960694581 | 0.2885197279209574 | T | T | T |
| 0.0022170755529142 | 0.8433198721317859 | 0.2900337074354624 | T | T | T |
| 0.2547552543637241 | 0.1025221159788311 | 0.2885887735248609 | T | T | T |
| 0.0867518370587556 | 0.5936945529328853 | 0.2879811410574473 | T | T | T |
| 0.0872896687151494 | 0.0947447938235922 | 0.2920319109354731 | T | T | T |
| 0.2517150413619073 | 0.5922105595200310 | 0.2816722979001063 | T | T | T |
| 0.0006642071813524 | 0.3434498873065700 | 0.2920083027717126 | T | T | T |
| 0.1710950719526876 | 0.8408812319938267 | 0.2878543702358216 | T | T | T |
| 0.5000000000000000 | 0.3333299999999966 | 0.0000000000000000 | F | F | F |
| 0.3333299999999966 | 0.8333299999999966 | 0.0000000000000000 | F | F | F |

0.5833299999999966 0.0833299999999966 0.0000000000000000 F F F  
0.4166700000000034 0.5833299999999966 0.0000000000000000 F F F  
0.4166700000000034 0.0833299999999966 0.0000000000000000 F F F  
0.5833299999999966 0.5833299999999966 0.0000000000000000 F F F  
0.3333299999999966 0.3333299999999966 0.0000000000000000 F F F  
0.5000000000000000 0.8333299999999966 0.0000000000000000 F F F  
0.5000000000000000 0.0000000000000000 0.0945999999999998 F F F  
0.3333299999999966 0.5000000000000000 0.0945999999999998 F F F  
0.4166700000000034 0.2500000000000000 0.0945999999999998 F F F  
0.5833299999999966 0.7500000000000000 0.0945999999999998 F F F  
0.5833299999999966 0.2500000000000000 0.0945999999999998 F F F  
0.4166700000000034 0.7500000000000000 0.0945999999999998 F F F  
0.3333299999999966 0.0000000000000000 0.0945999999999998 F F F  
0.5000000000000000 0.5000000000000000 0.0945999999999998 F F F  
0.3362369002382517 0.1674118564593645 0.1895264989041596 T T T  
0.5004332709150917 0.6745805568344667 0.1877944540794917 T T T  
0.5841375195371818 0.4212811360758397 0.1863161694126924 T T T  
0.4167189603171199 0.9192698490931892 0.1923458501240609 T T T  
0.4165555099946440 0.4227140746264972 0.1863310363358720 T T T  
0.5816892685025361 0.9199095376769904 0.1912843374292962 T T T  
0.4998574300406474 0.1668168845696430 0.1906212983144018 T T T  
0.3316748984049080 0.6733847027058758 0.1875640505529944 T T T  
0.4998629864844639 0.3545551516615360 0.2826200275995971 T T T  
0.3352202320741410 0.8433712450237232 0.2908984727147245 T T T  
0.5806652895984096 0.1086931069415270 0.2917030180974970 T T T  
0.4170838850978710 0.5933623667368582 0.2827098918088125 T T T  
0.4177929175585242 0.1079819337636248 0.2925973434362599 T T T  
0.5826623963006020 0.5935809541156560 0.2820606561020504 T T T  
0.3350915446696657 0.3532381665440272 0.2823475366571313 T T T  
0.4989800659742983 0.8448884490617203 0.2913676386560854 T T T  
0.8333299999999966 0.3333299999999966 0.0000000000000000 F F F  
0.6666700000000034 0.8333299999999966 0.0000000000000000 F F F  
0.9166700000000034 0.0833299999999966 0.0000000000000000 F F F  
0.7500000000000000 0.5833299999999966 0.0000000000000000 F F F  
0.7500000000000000 0.0833299999999966 0.0000000000000000 F F F  
0.9166700000000034 0.5833299999999966 0.0000000000000000 F F F  
0.6666700000000034 0.3333299999999966 0.0000000000000000 F F F  
0.8333299999999966 0.8333299999999966 0.0000000000000000 F F F  
0.8333299999999966 0.0000000000000000 0.0945999999999998 F F F  
0.6666700000000034 0.5000000000000000 0.0945999999999998 F F F  
0.7500000000000000 0.2500000000000000 0.0945999999999998 F F F  
0.9166700000000034 0.7500000000000000 0.0945999999999998 F F F  
0.9166700000000034 0.2500000000000000 0.0945999999999998 F F F  
0.7500000000000000 0.7500000000000000 0.0945999999999998 F F F  
0.6666700000000034 0.0000000000000000 0.0945999999999998 F F F  
0.8333299999999966 0.5000000000000000 0.0945999999999998 F F F  
0.6648377682840377 0.1654357809435027 0.1904424437032414 T T T  
0.8362043477898982 0.6728055509030190 0.1896966270815646 T T T  
0.9174242408659639 0.4188144053322584 0.1905752074257683 T T T  
0.7495643474605020 0.9208349193458721 0.1912744203559689 T T T  
0.7523425294446723 0.4192775568502239 0.1878442184944486 T T T  
0.9170434813702777 0.9231071491927620 0.1907551017024669 T T T  
0.8310903065174556 0.1676875530119754 0.1908501593294023 T T T  
0.6693912307574728 0.6728832181190263 0.1877053118363265 T T T  
0.8296201437669090 0.3453161263100189 0.2884836246711218 T T T  
0.6626811371563140 0.8417162962376812 0.2877324600316850 T T T  
0.9149239874930694 0.0940435870033263 0.2895508803905472 T T T  
0.7467485283856464 0.5908075493225078 0.2845988170731125 T T T  
0.7442875035189538 0.0996942493976615 0.2948559668254629 T T T  
0.9156034526989214 0.5928236369954558 0.2911015950073102 T T T  
0.6654444065567110 0.3518327312769331 0.2822284402338029 T T T  
0.8301272754209064 0.8426038697930881 0.2905176667455986 T T T  
0.0880129499301349 0.4280360535251466 0.3280691863563179 T T T  
0.0028414203305631 0.6720984562550922 0.3271739805563612 T T T  
0.1709289785274468 0.1707395531848001 0.3295173703754800 T T T  
0.0006371343177305 0.1748598789144274 0.3286663289517199 T T T  
0.0874051992900767 0.9217780941042079 0.3280737314255504 T T T  
0.2509361002226807 0.8332266013760082 0.3354442166608298 T T T  
0.4995546185053631 0.1067411848761234 0.3387642577811889 T T T  
0.3344626233851544 0.1030387337898425 0.3371137419881471 T T T

|                    |                    |                    |   |   |   |
|--------------------|--------------------|--------------------|---|---|---|
| 0.4172576043796662 | 0.8291066694560582 | 0.3370244726903188 | T | T | T |
| 0.5827948961595162 | 0.8339905980082406 | 0.3356786749200958 | T | T | T |
| 0.9141840794822993 | 0.4229059038115618 | 0.3283890463534289 | T | T | T |
| 0.8291501473031065 | 0.6711996888261526 | 0.3268290764156794 | T | T | T |
| 0.8310066591994987 | 0.1788814360227180 | 0.3294196892897924 | T | T | T |
| 0.6601717549356565 | 0.1157134415867900 | 0.3390637516282143 | T | T | T |
| 0.7489418070951595 | 0.9193525416714210 | 0.3285294165729835 | T | T | T |
| 0.9168268686203415 | 0.9235005686298510 | 0.3271202526432614 | T | T | T |
| 0.4168642298484316 | 0.6061996547354095 | 0.4601607090022934 | T | T | T |
| 0.4180937259763868 | 0.5838665800569370 | 0.3866764590689883 | T | T | T |
| 0.5014237549949637 | 0.3656727633207181 | 0.3977392469198541 | T | T | T |
| 0.5015242105499570 | 0.3886418895512962 | 0.4712286175158564 | T | T | T |
| 0.3463348168375414 | 0.3578272821692605 | 0.3947877675246992 | T | T | T |
| 0.3477582243803538 | 0.3681940420873007 | 0.4686800231725095 | T | T | T |
| 0.5724477960604409 | 0.5913182867171989 | 0.3843326366583787 | T | T | T |
| 0.5702631847918861 | 0.6248482469465259 | 0.4570186580922738 | T | T | T |
| 0.2617970352703890 | 0.5865305975722803 | 0.4649773145004294 | T | T | T |
| 0.2132633228115352 | 0.4458707277108641 | 0.4295744961265417 | T | T | T |
| 0.2623314410730849 | 0.5788329719422596 | 0.3905986868162525 | T | T | T |
| 0.6574874551157648 | 0.4116591377349744 | 0.4742128870721216 | T | T | T |
| 0.6575087820988034 | 0.3759608297462320 | 0.4010690672589496 | T | T | T |
| 0.7052376201760321 | 0.5289985971436473 | 0.4267947338075516 | T | T | T |
| 0.4196203043996936 | 0.5255489720977755 | 0.4271421059697784 | T | T | T |
| 0.4992521264905107 | 0.4461853096506967 | 0.4311579318834399 | T | T | T |
| 0.3449981072193378 | 0.4324358051854608 | 0.4303583953124604 | T | T | T |
| 0.5736412722128774 | 0.5394134517960025 | 0.4261047076841886 | T | T | T |
| 0.2661763186202638 | 0.5148104150478237 | 0.4291291302038266 | T | T | T |
| 0.6529138901188350 | 0.4600637877869821 | 0.4325445440671399 | T | T | T |

### C<sub>6</sub>H<sub>14</sub>···Pt (100) with 1 ML H

Energy: -10285.746588 eV

1.0000000000000000

23.3345999999999982 0.0000000000000000 0.0000000000000000

0.0000000000000000 11.6672999999999991 0.0000000000000000

0.0000000000000000 0.0000000000000000 22.8336000000000006

Pt H C

144 50 6

Selective dynamics

Direct

|                    |                     |                    |   |   |   |
|--------------------|---------------------|--------------------|---|---|---|
| 0.0000000000000000 | 0.1666700000000034  | 0.0000000000000000 | F | F | F |
| 0.0833299999999966 | 0.0000000000000000  | 0.0000000000000000 | F | F | F |
| 0.0000000000000000 | 0.0000000000000000  | 0.0851600000000019 | F | F | F |
| 0.0833299999999966 | 0.1666700000000034  | 0.0851600000000019 | F | F | F |
| 0.0000102453854511 | 0.1666005593059137  | 0.1696995300897067 | T | T | T |
| 0.0833387849293577 | -0.0000275451547538 | 0.1696857554411256 | T | T | T |
| 0.0000037941087112 | -0.0000947382775816 | 0.2566902557886625 | T | T | T |
| 0.0832985761470835 | 0.1666375627254923  | 0.2567810288940751 | T | T | T |
| 0.1666700000000034 | 0.1666700000000034  | 0.0000000000000000 | F | F | F |
| 0.2500000000000000 | 0.0000000000000000  | 0.0000000000000000 | F | F | F |
| 0.1666700000000034 | 0.0000000000000000  | 0.0851600000000019 | F | F | F |
| 0.2500000000000000 | 0.1666700000000034  | 0.0851600000000019 | F | F | F |
| 0.1666224869897136 | 0.1665884839534396  | 0.1697178825502696 | T | T | T |
| 0.2498983109758027 | 0.0000483721586266  | 0.1697590639779723 | T | T | T |
| 0.1666197826054856 | 0.0000577264446341  | 0.2568741679533946 | T | T | T |
| 0.2499038137358921 | 0.1668212456179400  | 0.2568539336628283 | T | T | T |
| 0.3333299999999966 | 0.1666700000000034  | 0.0000000000000000 | F | F | F |
| 0.4166700000000034 | 0.0000000000000000  | 0.0000000000000000 | F | F | F |
| 0.3333299999999966 | 0.0000000000000000  | 0.0851600000000019 | F | F | F |
| 0.4166700000000034 | 0.1666700000000034  | 0.0851600000000019 | F | F | F |
| 0.3332030218320413 | 0.1664660453567192  | 0.1696728349087767 | T | T | T |
| 0.4165748372192190 | -0.0000357666217913 | 0.1697371028131675 | T | T | T |
| 0.3332641846146852 | 0.0001492877419086  | 0.2569114396614779 | T | T | T |
| 0.4165410717228314 | 0.1666670453908695  | 0.2567587198301920 | T | T | T |
| 0.5000000000000000 | 0.1666700000000034  | 0.0000000000000000 | F | F | F |
| 0.5833299999999966 | 0.0000000000000000  | 0.0000000000000000 | F | F | F |
| 0.5000000000000000 | 0.0000000000000000  | 0.0851600000000019 | F | F | F |
| 0.5833299999999966 | 0.1666700000000034  | 0.0851600000000019 | F | F | F |
| 0.4999701730226900 | 0.1662216131386045  | 0.1695787159735491 | T | T | T |
| 0.5834115330895129 | -0.0003369193173466 | 0.1697118081047183 | T | T | T |



|                     |                     |                    |   |   |   |
|---------------------|---------------------|--------------------|---|---|---|
| 0.4999659016989789  | 0.0000427477395044  | 0.2568568525670272 | T | T | T |
| 0.5834206703903321  | 0.1663603025300627  | 0.2564683301525662 | T | T | T |
| 0.6666700000000034  | 0.1666700000000034  | 0.0000000000000000 | F | F | F |
| 0.7500000000000000  | 0.0000000000000000  | 0.0000000000000000 | F | F | F |
| 0.6666700000000034  | 0.0000000000000000  | 0.0851600000000019 | F | F | F |
| 0.7500000000000000  | 0.1666700000000034  | 0.0851600000000019 | F | F | F |
| 0.6668321879798772  | 0.1661496425957298  | 0.1695715078376566 | T | T | T |
| 0.7500776039990524  | -0.0003019766698752 | 0.1697302610491829 | T | T | T |
| 0.6667128630961211  | -0.0002427492844320 | 0.2568832169934609 | T | T | T |
| 0.7501234057493521  | 0.1663835768813144  | 0.2566986703533228 | T | T | T |
| 0.8333299999999966  | 0.1666700000000034  | 0.0000000000000000 | F | F | F |
| 0.9166700000000034  | 0.0000000000000000  | 0.0000000000000000 | F | F | F |
| 0.8333299999999966  | 0.0000000000000000  | 0.0851600000000019 | F | F | F |
| 0.9166700000000034  | 0.1666700000000034  | 0.0851600000000019 | F | F | F |
| 0.8334013822227870  | 0.1664155990626972  | 0.1696889889217569 | T | T | T |
| 0.9166720296519477  | -0.0001268585737242 | 0.1696722065864055 | T | T | T |
| 0.8333795428256568  | -0.0002496048364103 | 0.2568097075936954 | T | T | T |
| 0.9166990158155334  | 0.1664862287500909  | 0.2567336351283712 | T | T | T |
| 0.0000000000000000  | 0.5000000000000000  | 0.0000000000000000 | F | F | F |
| 0.0833299999999966  | 0.3333299999999966  | 0.0000000000000000 | F | F | F |
| 0.0000000000000000  | 0.3333299999999966  | 0.0851600000000019 | F | F | F |
| 0.0833299999999966  | 0.5000000000000000  | 0.0851600000000019 | F | F | F |
| -0.0000284137978737 | 0.4999870323714319  | 0.1697093245382462 | T | T | T |
| 0.0833001871520929  | 0.3332684620574177  | 0.1697065664611489 | T | T | T |
| -0.0000168195957352 | 0.3332185568960749  | 0.2567495173941268 | T | T | T |
| 0.0832349409028593  | 0.5000130853233732  | 0.2567381410812015 | T | T | T |
| 0.1666700000000034  | 0.5000000000000000  | 0.0000000000000000 | F | F | F |
| 0.2500000000000000  | 0.3333299999999966  | 0.0000000000000000 | F | F | F |
| 0.1666700000000034  | 0.3333299999999966  | 0.0851600000000019 | F | F | F |
| 0.2500000000000000  | 0.5000000000000000  | 0.0851600000000019 | F | F | F |
| 0.1665711466569433  | 0.5000736047871424  | 0.1696972679408813 | T | T | T |
| 0.2498278833165984  | 0.3332961248104557  | 0.1696459986642777 | T | T | T |
| 0.1665672776134684  | 0.3334041326775573  | 0.2567498702464810 | T | T | T |
| 0.2499283828354530  | 0.5001280319536020  | 0.2566431757908924 | T | T | T |
| 0.3333299999999966  | 0.5000000000000000  | 0.0000000000000000 | F | F | F |
| 0.4166700000000034  | 0.3333299999999966  | 0.0000000000000000 | F | F | F |
| 0.3333299999999966  | 0.3333299999999966  | 0.0851600000000019 | F | F | F |
| 0.4166700000000034  | 0.5000000000000000  | 0.0851600000000019 | F | F | F |
| 0.3331047602300249  | 0.5001732202525042  | 0.1695216984058191 | T | T | T |
| 0.4164948184601281  | 0.3330865034178902  | 0.1694626131928923 | T | T | T |
| 0.3331626479098244  | 0.3334170219289470  | 0.2564456711731798 | T | T | T |
| 0.4166528382033801  | 0.5001556063977518  | 0.2558432657034602 | T | T | T |
| 0.5000000000000000  | 0.5000000000000000  | 0.0000000000000000 | F | F | F |
| 0.5833299999999966  | 0.3333299999999966  | 0.0000000000000000 | F | F | F |
| 0.5000000000000000  | 0.3333299999999966  | 0.0851600000000019 | F | F | F |
| 0.5833299999999966  | 0.5000000000000000  | 0.0851600000000019 | F | F | F |
| 0.5000104762847768  | 0.5002259734890897  | 0.1693036286578816 | T | T | T |
| 0.5834593973778851  | 0.3330253953467313  | 0.1693806478521184 | T | T | T |
| 0.4999819841490123  | 0.3331188364985904  | 0.2559580068401364 | T | T | T |
| 0.5832989846765448  | 0.5001010011076258  | 0.2559451210592780 | T | T | T |
| 0.6666700000000034  | 0.5000000000000000  | 0.0000000000000000 | F | F | F |
| 0.7500000000000000  | 0.3333299999999966  | 0.0000000000000000 | F | F | F |
| 0.6666700000000034  | 0.3333299999999966  | 0.0851600000000019 | F | F | F |
| 0.7500000000000000  | 0.5000000000000000  | 0.0851600000000019 | F | F | F |
| 0.6668641641874817  | 0.5001993197889443  | 0.1695348146572185 | T | T | T |
| 0.7502161603941015  | 0.3331655314481497  | 0.1695849240557938 | T | T | T |
| 0.6668091746925673  | 0.3330999395261542  | 0.2560530256812161 | T | T | T |
| 0.7500652560958208  | 0.4998406455613312  | 0.2568275625595212 | T | T | T |
| 0.8333299999999966  | 0.5000000000000000  | 0.0000000000000000 | F | F | F |
| 0.9166700000000034  | 0.3333299999999966  | 0.0000000000000000 | F | F | F |
| 0.8333299999999966  | 0.3333299999999966  | 0.0851600000000019 | F | F | F |
| 0.9166700000000034  | 0.5000000000000000  | 0.0851600000000019 | F | F | F |
| 0.8333522645000910  | 0.5000333833008630  | 0.1697308314816262 | T | T | T |
| 0.9166730003013899  | 0.3332548148527752  | 0.1697165382468054 | T | T | T |
| 0.8333997781398533  | 0.3331620864624549  | 0.2567224865085743 | T | T | T |
| 0.9166727045019361  | 0.4998513731415926  | 0.2567707708287178 | T | T | T |
| 0.0000000000000000  | 0.8333299999999966  | 0.0000000000000000 | F | F | F |
| 0.0833299999999966  | 0.6666700000000034  | 0.0000000000000000 | F | F | F |
| 0.0000000000000000  | 0.6666700000000034  | 0.0851600000000019 | F | F | F |
| 0.0833299999999966  | 0.8333299999999966  | 0.0851600000000019 | F | F | F |

|                     |                    |                    |   |   |   |
|---------------------|--------------------|--------------------|---|---|---|
| -0.0000228832667944 | 0.8333014234246146 | 0.1696649741842100 | T | T | T |
| 0.0832933501880914  | 0.6667080972231249 | 0.1697015384602690 | T | T | T |
| -0.0000558147470018 | 0.6665837427472538 | 0.2567143302548127 | T | T | T |
| 0.0832769312744820  | 0.8332934892590613 | 0.2567381222278647 | T | T | T |
| 0.1666700000000034  | 0.8333299999999966 | 0.0000000000000000 | F | F | F |
| 0.2500000000000000  | 0.6666700000000034 | 0.0000000000000000 | F | F | F |
| 0.1666700000000034  | 0.6666700000000034 | 0.0851600000000019 | F | F | F |
| 0.2500000000000000  | 0.8333299999999966 | 0.0851600000000019 | F | F | F |
| 0.1666230671875000  | 0.8334306541444439 | 0.1697111504208415 | T | T | T |
| 0.2498513753536694  | 0.6669209923818196 | 0.1696792028038144 | T | T | T |
| 0.1665772763223813  | 0.6666999592040598 | 0.2567534051618864 | T | T | T |
| 0.2498851016436935  | 0.8334910679889883 | 0.2569039984652280 | T | T | T |
| 0.3333299999999966  | 0.8333299999999966 | 0.0000000000000000 | F | F | F |
| 0.4166700000000034  | 0.6666700000000034 | 0.0000000000000000 | F | F | F |
| 0.3333299999999966  | 0.6666700000000034 | 0.0851600000000019 | F | F | F |
| 0.4166700000000034  | 0.8333299999999966 | 0.0851600000000019 | F | F | F |
| 0.3331732016548796  | 0.8337420284235693 | 0.1696842472436958 | T | T | T |
| 0.4165343974513548  | 0.6672194194009315 | 0.1694938764488853 | T | T | T |
| 0.3332306606720880  | 0.6670697357329209 | 0.2564419071722610 | T | T | T |
| 0.4166076545170477  | 0.8336019304232875 | 0.2568345445020297 | T | T | T |
| 0.5000000000000000  | 0.8333299999999966 | 0.0000000000000000 | F | F | F |
| 0.5833299999999966  | 0.6666700000000034 | 0.0000000000000000 | F | F | F |
| 0.5000000000000000  | 0.6666700000000034 | 0.0851600000000019 | F | F | F |
| 0.5833299999999966  | 0.8333299999999966 | 0.0851600000000019 | F | F | F |
| 0.4999710519969340  | 0.8336385242749317 | 0.1697160270369203 | T | T | T |
| 0.5834048393024729  | 0.6671146796489508 | 0.1695780113513342 | T | T | T |
| 0.4999007987116891  | 0.6669375764411780 | 0.2564781839038278 | T | T | T |
| 0.5833158840386468  | 0.8332179959652889 | 0.2569092909147276 | T | T | T |
| 0.6666700000000034  | 0.8333299999999966 | 0.0000000000000000 | F | F | F |
| 0.7500000000000000  | 0.6666700000000034 | 0.0000000000000000 | F | F | F |
| 0.6666700000000034  | 0.6666700000000034 | 0.0851600000000019 | F | F | F |
| 0.7500000000000000  | 0.8333299999999966 | 0.0851600000000019 | F | F | F |
| 0.6667542227107043  | 0.8332567846868255 | 0.1698105524701997 | T | T | T |
| 0.7500481453899189  | 0.6667261016108902 | 0.1697735405233891 | T | T | T |
| 0.6666749677421605  | 0.6664704457212551 | 0.2569531860730815 | T | T | T |
| 0.7499721258299864  | 0.8330510504426017 | 0.2569703914023563 | T | T | T |
| 0.8333299999999966  | 0.8333299999999966 | 0.0000000000000000 | F | F | F |
| 0.9166700000000034  | 0.6666700000000034 | 0.0000000000000000 | F | F | F |
| 0.8333299999999966  | 0.6666700000000034 | 0.0851600000000019 | F | F | F |
| 0.9166700000000034  | 0.8333299999999966 | 0.0851600000000019 | F | F | F |
| 0.8333151190762830  | 0.8332034761969929 | 0.1697245082155809 | T | T | T |
| 0.9166207250220235  | 0.6666370345074023 | 0.1697029324431931 | T | T | T |
| 0.8333177608869552  | 0.6664351093761630 | 0.2568767865555625 | T | T | T |
| 0.9166507910985308  | 0.8331689531379182 | 0.2567267316446212 | T | T | T |
| 0.1249039633017615  | 0.8333313193080033 | 0.3034909068561089 | T | T | T |
| 0.2915829794974313  | 0.8335542663076848 | 0.3035379903613276 | T | T | T |
| 0.0416245449384047  | 0.2499198665344242 | 0.3033974448214695 | T | T | T |
| 0.2082244598538554  | 0.2501796549911586 | 0.3034226504620124 | T | T | T |
| 0.4584189185836159  | 0.8337165710738358 | 0.3034623791114635 | T | T | T |
| 0.6250852388119200  | 0.8334109708789359 | 0.3033887880724674 | T | T | T |
| 0.3743657973609317  | 0.2495105033406390 | 0.3031078994768846 | T | T | T |
| 0.5415869599222025  | 0.2490917434787068 | 0.3025786875148708 | T | T | T |
| 0.7917550158791070  | 0.8331333141747614 | 0.3034296780483734 | T | T | T |
| 0.9583824203768881  | 0.8332335419871444 | 0.3033539942451674 | T | T | T |
| 0.7086517625659344  | 0.2500600270696524 | 0.3030041150742592 | T | T | T |
| 0.8750755386580662  | 0.2499059773949921 | 0.3033638626717148 | T | T | T |
| 0.1248629045763061  | 0.4166588016478682 | 0.3033992296874883 | T | T | T |
| 0.2915802738857509  | 0.4168541449899966 | 0.3031675702189189 | T | T | T |
| 0.0415618081423922  | 0.5833039374760297 | 0.3033699769576492 | T | T | T |
| 0.2082685678974411  | 0.5833598324057010 | 0.3033506481103005 | T | T | T |
| 0.4583631107134811  | 0.4168863174399122 | 0.3021512011713652 | T | T | T |
| 0.6252506912080055  | 0.4170668449070717 | 0.3020831563140764 | T | T | T |
| 0.3756969307589183  | 0.5853426715186368 | 0.3024616633535094 | T | T | T |
| 0.5413459846302734  | 0.5835981907877872 | 0.3026057756725113 | T | T | T |
| 0.7916482434179065  | 0.4163419636915150 | 0.3033975268093961 | T | T | T |
| 0.9583499924195849  | 0.4166196112821268 | 0.3034043980043009 | T | T | T |
| 0.7081481585861944  | 0.5827035082414894 | 0.3035060965746363 | T | T | T |
| 0.875050375130695   | 0.5832671182710932 | 0.3034522381273593 | T | T | T |
| 0.1248956692738083  | 0.7499829466534902 | 0.3033988202005720 | T | T | T |
| 0.2916015667568732  | 0.7500135412447834 | 0.3034016291367093 | T | T | T |

|                    |                    |                    |   |   |   |
|--------------------|--------------------|--------------------|---|---|---|
| 0.0416222042263309 | 0.9166284865224548 | 0.3033738104998637 | T | T | T |
| 0.2082170080566974 | 0.9167859383735597 | 0.3035912844975052 | T | T | T |
| 0.4581575803747823 | 0.7499153528294070 | 0.3033670578655187 | T | T | T |
| 0.6248338741174997 | 0.7495668785092584 | 0.3035727825021301 | T | T | T |
| 0.3749459654856688 | 0.9168669555489987 | 0.3035557288009612 | T | T | T |
| 0.5416389939255881 | 0.9166728744841122 | 0.3035026553912507 | T | T | T |
| 0.7917132691737817 | 0.7498501847399170 | 0.3035874082152155 | T | T | T |
| 0.9583203865226529 | 0.7499651345819121 | 0.3033684205126549 | T | T | T |
| 0.7083406946427613 | 0.9165178453211351 | 0.3036059157682943 | T | T | T |
| 0.8750704090548077 | 0.9164854053961891 | 0.3034613244437372 | T | T | T |
| 0.4732263195472688 | 0.5052694276506510 | 0.4675134555208379 | T | T | T |
| 0.4752436077256115 | 0.5096402022407487 | 0.3907888120686684 | T | T | T |
| 0.5326727235690786 | 0.3263491265138293 | 0.3907230425473208 | T | T | T |
| 0.5332725355371012 | 0.3283296701462954 | 0.4674239671942171 | T | T | T |
| 0.4267500016834646 | 0.3189572514061080 | 0.3862166019335278 | T | T | T |
| 0.4244477114324200 | 0.3133963906897782 | 0.4627947143712384 | T | T | T |
| 0.5839869640335383 | 0.5130966575916803 | 0.3879777025351401 | T | T | T |
| 0.5851519036652906 | 0.5178835072398913 | 0.4646303741168836 | T | T | T |
| 0.3616916753884578 | 0.4878924370031584 | 0.4651660499654090 | T | T | T |
| 0.3305024598825100 | 0.3800548288266800 | 0.4210176945724941 | T | T | T |
| 0.3654049671666897 | 0.4977564338561488 | 0.3882501297582621 | T | T | T |
| 0.6447037021845767 | 0.3405377066944147 | 0.4683251286650074 | T | T | T |
| 0.6398298534139024 | 0.3255374168999356 | 0.3917280371120633 | T | T | T |
| 0.6782310135365203 | 0.4418451207057836 | 0.4219233057704677 | T | T | T |
| 0.4758562624635830 | 0.4507564258261402 | 0.4284130895340386 | T | T | T |
| 0.5318860171829645 | 0.3841643633081793 | 0.4287474557783081 | T | T | T |
| 0.4235763661176578 | 0.3728439966508285 | 0.4255717721286489 | T | T | T |
| 0.5853433967602333 | 0.4588141646453908 | 0.4272833395547481 | T | T | T |
| 0.3671289677941557 | 0.4379000737729684 | 0.4250802074203648 | T | T | T |
| 0.6401646776127938 | 0.3883135827271483 | 0.4273932601289099 | T | T | T |

**C<sub>4</sub>H<sub>10</sub>···SrTiO<sub>3</sub> (001)**

**Energy: -5310.140219 eV**

1.0000000000000000

23.3760000000000012 0.0000000000000000 0.0000000000000000

0.0000000000000000 11.6880000000000006 0.0000000000000000

0.0000000000000000 0.0000000000000000 28.6878999999999991

Sr Ti O C H

54 88 230 4 10

Selective dynamics

Direct

|                    |                    |                    |   |   |   |
|--------------------|--------------------|--------------------|---|---|---|
| 0.0833299999999966 | 0.1666700000000034 | 0.0679000000000016 | F | F | F |
| 0.0837497188757101 | 0.1673409239037983 | 0.2033887100742426 | T | T | T |
| 0.0821643396391831 | 0.1622275216709538 | 0.3408482577696957 | T | T | T |
| 0.2500000000000000 | 0.1666700000000034 | 0.0679000000000016 | F | F | F |
| 0.2499249271238669 | 0.1671369118070774 | 0.2037658997218028 | T | T | T |
| 0.2506106769897403 | 0.1631908224536480 | 0.3399824744088946 | T | T | T |
| 0.4166600000000003 | 0.1666700000000034 | 0.0679000000000016 | F | F | F |
| 0.4163230111989093 | 0.1673888235851855 | 0.2033787253137541 | T | T | T |
| 0.4186100632107663 | 0.1628372608284239 | 0.3400868986530274 | T | T | T |
| 0.0833299999999966 | 0.5000000000000000 | 0.0679000000000016 | F | F | F |
| 0.0836237798140304 | 0.5000956883288790 | 0.2037827978978770 | T | T | T |
| 0.0808540351297308 | 0.4986105713065867 | 0.3400508231620747 | T | T | T |
| 0.2500000000000000 | 0.5000000000000000 | 0.0679000000000016 | F | F | F |
| 0.2499484941784635 | 0.5001721331393688 | 0.2041187857940976 | T | T | T |
| 0.2495392989461921 | 0.5010819786094525 | 0.3361092013574656 | T | T | T |
| 0.4166600000000003 | 0.5000000000000000 | 0.0679000000000016 | F | F | F |
| 0.4164123237651717 | 0.5002016211606375 | 0.2037878680100093 | T | T | T |
| 0.4184429801944147 | 0.4987784986587732 | 0.3399135884604460 | T | T | T |
| 0.0833299999999966 | 0.8333299999999966 | 0.0679000000000016 | F | F | F |
| 0.0837669119412631 | 0.8325788701785855 | 0.2034081389191022 | T | T | T |
| 0.0821527486649026 | 0.8357157995224896 | 0.3414476107850906 | T | T | T |
| 0.2500000000000000 | 0.8333299999999966 | 0.0679000000000016 | F | F | F |
| 0.2499576218657999 | 0.8328285512801168 | 0.2038126062518997 | T | T | T |
| 0.2506649645950887 | 0.8384799498406399 | 0.3401681655022844 | T | T | T |
| 0.4166600000000003 | 0.8333299999999966 | 0.0679000000000016 | F | F | F |
| 0.4163411894791391 | 0.8326230982584667 | 0.2034104032660753 | T | T | T |
| 0.4188661460640855 | 0.8357375851111472 | 0.3409373289896561 | T | T | T |
| 0.5833299999999966 | 0.1666700000000034 | 0.0679000000000016 | F | F | F |

0.5837663236898039 0.1672967302337317 0.2034105903367612 T T T  
0.5822899303668643 0.1622010256542979 0.3409130032360513 T T T  
0.7500000000000000 0.16667000000000034 0.06790000000000016 F F F  
0.7499378999745542 0.1671216796662325 0.2037424715970195 T T T  
0.7506998525984805 0.1632449628651099 0.3398920774470633 T T T  
0.9166600000000003 0.16667000000000034 0.06790000000000016 F F F  
0.9163217986367646 0.1673799466197824 0.2033404581839122 T T T  
0.9186507983918486 0.1628113746976609 0.3399767055274908 T T T  
0.5833299999999966 0.5000000000000000 0.06790000000000016 F F F  
0.5836082992059167 0.5001058552075359 0.2037945258800583 T T T  
0.5808209444061768 0.4986972536136673 0.3400608638071864 T T T  
0.7500000000000000 0.5000000000000000 0.06790000000000016 F F F  
0.7499452607903996 0.5001142073312419 0.2041080812178363 T T T  
0.7495331080900459 0.5010937472109132 0.3360757302186516 T T T  
0.9166600000000003 0.5000000000000000 0.06790000000000016 F F F  
0.9164489612658324 0.5001641608134638 0.2037526710823256 T T T  
0.9184737498960790 0.4986745169837358 0.3398908245451069 T T T  
0.5833299999999966 0.8333299999999966 0.06790000000000016 F F F  
0.5837432165700471 0.8326181601426953 0.2034220125401948 T T T  
0.5822600060677768 0.8357623043101740 0.3415114589436350 T T T  
0.7500000000000000 0.8333299999999966 0.06790000000000016 F F F  
0.7499636109293435 0.8328199302162080 0.2037945521688119 T T T  
0.7507426120183739 0.8383710248549383 0.3400889889139701 T T T  
0.9166600000000003 0.8333299999999966 0.06790000000000016 F F F  
0.9163410233040125 0.8325495389592475 0.2033843219240890 T T T  
0.9189325572282198 0.8356560235082364 0.3408333060241898 T T T  
0.0000000000000000 0.0000000000000000 0.0000000000000000 F F F  
0.0000000000000000 0.0000000000000000 0.1358099999999993 F F F  
0.0002390768482763 0.9996186116490202 0.2698619706011521 T T T  
0.0029594683033612 0.9940672937545186 0.4033851897385167 T T T  
0.16667000000000034 0.0000000000000000 0.0000000000000000 F F F  
0.16667000000000034 0.0000000000000000 0.1358099999999993 F F F  
0.1665513601072758 0.9999327497098739 0.2716323281981330 T T T  
0.1700630660977137 0.0012449172070319 0.4092658747014972 T T T  
0.3333399999999997 0.0000000000000000 0.0000000000000000 F F F  
0.3333399999999997 0.0000000000000000 0.1358099999999993 F F F  
0.3336206798179576 0.9999848280706480 0.2715052037763831 T T T  
0.3376550729026232 0.0014852898199832 0.4094420263879828 T T T  
0.0000000000000000 0.3333299999999966 0.0000000000000000 F F F  
0.0000000000000000 0.3333299999999966 0.1358099999999993 F F F  
0.0000415601381476 0.3328030493455100 0.2714728173638207 T T T  
0.4993509401406184 0.3246261231990559 0.4093896538249852 T T T  
0.16667000000000034 0.3333299999999966 0.0000000000000000 F F F  
0.16667000000000034 0.3333299999999966 0.1358099999999993 F F F  
0.1655960502922041 0.3312001449799571 0.2733195778140652 T T T  
0.170992530041553 0.3441415438793945 0.4076367010791087 T T T  
0.3333399999999997 0.3333299999999966 0.0000000000000000 F F F  
0.3333399999999997 0.3333299999999966 0.1358099999999993 F F F  
0.3343194739067943 0.3313775293917443 0.2732726874990135 T T T  
0.3277345377430717 0.3444871113054158 0.4075029124405746 T T T  
0.0000000000000000 0.66667000000000034 0.0000000000000000 F F F  
0.0000000000000000 0.66667000000000034 0.1358099999999993 F F F  
0.0000861303312135 0.6669806691798261 0.2715857563540042 T T T  
0.4994362042262591 0.6598856023541044 0.4091095727517678 T T T  
0.16667000000000034 0.66667000000000034 0.0000000000000000 F F F  
0.16667000000000034 0.66667000000000034 0.1358099999999993 F F F  
0.1655918567903071 0.6688951529652364 0.2733346116370749 T T T  
0.1710976708314829 0.6577336347919689 0.4076715197503457 T T T  
0.3333399999999997 0.66667000000000034 0.0000000000000000 F F F  
0.3333399999999997 0.66667000000000034 0.1358099999999993 F F F  
0.3344229653113757 0.6689250040597424 0.2733278014899111 T T T  
0.3278868289308176 0.6580378927213842 0.4076290651405056 T T T  
0.1731606851443017 0.1713835321606975 0.4852961285413439 T T T  
0.3236784512033494 0.8329817677250111 0.4852365190222804 T T T  
0.4144771474927055 0.3516414893873634 0.4849489969886322 T T T  
0.0836821163263242 0.6531786926327501 0.4853459299598272 T T T  
0.1733544438139306 0.8326762368587792 0.4853731348664525 T T T  
0.3238826071661042 0.1713338413996129 0.4851113201542206 T T T  
0.4144879560179697 0.6542747985495885 0.4850155093971319 T T T  
0.0835506318709838 0.3524187449117721 0.4852366753052570 T T T

0.5000000000000000 0.0000000000000000 0.0000000000000000 F F F  
0.5000000000000000 0.0000000000000000 0.1358099999999999 F F F  
0.5002604746708947 0.9995420589932543 0.2699582864559401 T T T  
0.5030774049167328 0.9941257861874526 0.4034431222532232 T T T  
0.6666700000000034 0.0000000000000000 0.0000000000000000 F F F  
0.6666700000000034 0.0000000000000000 0.1358099999999999 F F F  
0.6665742622118832 0.9998855984882217 0.2716218368600877 T T T  
0.6704236804133904 0.0013266585316377 0.4092133724857037 T T T  
0.8333399999999997 0.0000000000000000 0.0000000000000000 F F F  
0.8333399999999997 0.0000000000000000 0.1358099999999999 F F F  
0.8336482217488050 0.9999643167958542 0.2714751868183874 T T T  
0.8377393415093912 0.0015695055440234 0.4093883472936597 T T T  
0.5000000000000000 0.3333299999999966 0.0000000000000000 F F F  
0.5000000000000000 0.3333299999999966 0.1358099999999999 F F F  
0.5000548794904703 0.3327544160816091 0.2714741556765537 T T T  
0.9992925010044628 0.3246551069726575 0.4094197376434384 T T T  
0.6666700000000034 0.3333299999999966 0.0000000000000000 F F F  
0.6666700000000034 0.3333299999999966 0.1358099999999999 F F F  
0.6655909190855811 0.3311923252101885 0.2733238172000664 T T T  
0.6711263234402929 0.3443415055241311 0.4076415370073656 T T T  
0.8333399999999997 0.3333299999999966 0.0000000000000000 F F F  
0.8333399999999997 0.3333299999999966 0.1358099999999999 F F F  
0.8343263689851312 0.3313947626074984 0.2732446585498206 T T T  
0.8278223697962283 0.3445373528682567 0.4074722625293872 T T T  
0.5000000000000000 0.6666700000000034 0.0000000000000000 F F F  
0.5000000000000000 0.6666700000000034 0.1358099999999999 F F F  
0.5000724672559810 0.6669789368122400 0.2715837186657892 T T T  
0.9994728996661180 0.6595938957778026 0.4091677254932436 T T T  
0.6666700000000034 0.6666700000000034 0.0000000000000000 F F F  
0.6666700000000034 0.6666700000000034 0.1358099999999999 F F F  
0.6656036192460231 0.6688505481827322 0.2733129797522971 T T T  
0.6712247112236455 0.6578702900954566 0.4076270197688013 T T T  
0.8333399999999997 0.6666700000000034 0.0000000000000000 F F F  
0.8333399999999997 0.6666700000000034 0.1358099999999999 F F F  
0.8344307822658051 0.6688754279741015 0.2732982853913434 T T T  
0.8280535920203704 0.6579816406653100 0.4075635119233258 T T T  
0.6733266094214932 0.1714008787399566 0.4852184885822418 T T T  
0.8240681725205309 0.8329549268658879 0.4851442638062728 T T T  
0.9143609731005203 0.3521765158562512 0.4850811693834096 T T T  
0.5837095248805274 0.6540276958896561 0.4851109310787756 T T T  
0.6737560366984520 0.8327884710395689 0.4852997096243387 T T T  
0.8240645664600242 0.1713374438870055 0.4850711001921469 T T T  
0.9144620055989257 0.6536413807396978 0.4851576072018897 T T T  
0.5836408800436791 0.3524024150800009 0.4851758189538125 T T T  
0.0000000000000000 0.1666700000000034 0.0000000000000000 F F F  
0.0000000000000000 0.1666700000000034 0.1358099999999999 F F F  
0.0000000000000000 0.0000000000000000 0.0679000000000016 F F F  
0.0833299999999966 0.0000000000000000 0.0000000000000000 F F F  
0.0833299999999966 0.0000000000000000 0.1358099999999999 F F F  
0.4998146930019515 0.1668238950012143 0.2714760325092538 T T T  
0.4988841746257904 0.1682880613151325 0.4044668684790517 T T T  
0.4997443100730435 0.0006488182854926 0.2033835896886897 T T T  
0.4997921272206641 0.0006087167510234 0.3386374910584186 T T T  
0.0828892162264475 0.0006180056405994 0.2708433799906099 T T T  
0.0819105575424617 0.0023142877924584 0.4043806628545149 T T T  
0.1666700000000034 0.1666700000000034 0.0000000000000000 F F F  
0.1666700000000034 0.1666700000000034 0.1358099999999999 F F F  
0.1666700000000034 0.0000000000000000 0.0679000000000016 F F F  
0.2500000000000000 0.0000000000000000 0.0000000000000000 F F F  
0.2500000000000000 0.0000000000000000 0.1358099999999999 F F F  
0.1667530981000826 0.1659458660708073 0.2703828087772668 T T T  
0.1679225322102436 0.1689022882788290 0.4180342335282547 T T T  
0.1668262860651316 0.0002622817102044 0.2034768674148812 T T T  
0.1638855718258208 0.0005643391773152 0.3404537322451944 T T T  
0.2497752489983224 0.0004124383532288 0.2725165397473059 T T T  
0.2480955561105272 0.0018714435881045 0.4009735821701828 T T T  
0.3333399999999997 0.1666700000000034 0.0000000000000000 F F F  
0.3333399999999997 0.1666700000000034 0.1358099999999999 F F F  
0.3333399999999997 0.0000000000000000 0.0679000000000016 F F F  
0.4166600000000003 0.0000000000000000 0.0000000000000000 F F F

0.4166600000000003 0.0000000000000000 0.1358099999999993 F F F  
0.3328553281361817 0.1659176913836787 0.2703115733597659 T T T  
0.3295275846822432 0.1680376224636496 0.4178304304222416 T T T  
0.3331217422452554 0.0003321726521375 0.2035265313615124 T T T  
0.3341601707675315 0.0007850514062213 0.3407642899714921 T T T  
0.4166550402232208 0.0005970223553927 0.2714603322721934 T T T  
0.4158512832495744 0.0025330998086114 0.4044737230318909 T T T  
0.0000000000000000 0.5000000000000000 0.0000000000000000 F F F  
0.0000000000000000 0.5000000000000000 0.1358099999999993 F F F  
0.0000000000000000 0.3333299999999996 0.0679000000000016 F F F  
0.0833299999999996 0.3333299999999996 0.0000000000000000 F F F  
0.0833299999999996 0.3333299999999996 0.1358099999999993 F F F  
0.9997911750983294 0.5004632705750125 0.2724993518912927 T T T  
0.4991334511915370 0.5037988727264014 0.4011122426381240 T T T  
0.9998691902399688 0.3338081443727714 0.2035196603934110 T T T  
0.4996934012746039 0.3318435417034718 0.3408270309810175 T T T  
0.0825313001262619 0.3343267173051627 0.2702310888235464 T T T  
0.0822426457605056 0.3409334016413894 0.4178925607540485 T T T  
0.1666700000000034 0.5000000000000000 0.0000000000000000 F F F  
0.1666700000000034 0.5000000000000000 0.1358099999999993 F F F  
0.1666700000000034 0.3333299999999996 0.0679000000000016 F F F  
0.2500000000000000 0.3333299999999996 0.0000000000000000 F F F  
0.2500000000000000 0.3333299999999996 0.1358099999999993 F F F  
0.1661859890240224 0.5004113684305775 0.2760868780715365 T T T  
0.1663373060865910 0.5011451283855941 0.3964082586789053 T T T  
0.1677744609080234 0.3358250453670029 0.2046340659294170 T T T  
0.1574373993260146 0.3172215783337589 0.3408502980581770 T T T  
0.2497870461673196 0.3333931191844574 0.2762493317670169 T T T  
0.2493589475878851 0.3353468596189473 0.3960779253601678 T T T  
0.3333399999999997 0.5000000000000000 0.0000000000000000 F F F  
0.3333399999999997 0.5000000000000000 0.1358099999999993 F F F  
0.3333399999999997 0.3333299999999996 0.0679000000000016 F F F  
0.4166600000000003 0.3333299999999996 0.0000000000000000 F F F  
0.4166600000000003 0.3333299999999996 0.1358099999999993 F F F  
0.3334005122513556 0.5005075323060327 0.2762584521644195 T T T  
0.3325743188186689 0.5013691103648845 0.3961019520433937 T T T  
0.3320371682276619 0.3360150113481221 0.2046534995020291 T T T  
0.3417591121902895 0.3165274959149190 0.3408572407020253 T T T  
0.4170865446685850 0.3342753777717030 0.2703570155731758 T T T  
0.4160461275504716 0.3400397938849459 0.4178050405797141 T T T  
0.0000000000000000 0.8333299999999996 0.0000000000000000 F F F  
0.0000000000000000 0.8333299999999996 0.1358099999999993 F F F  
0.0000000000000000 0.6666700000000034 0.0679000000000016 F F F  
0.0833299999999996 0.6666700000000034 0.0000000000000000 F F F  
0.0833299999999996 0.6666700000000034 0.1358099999999993 F F F  
0.4998062637361924 0.8342781696082895 0.2709148078227570 T T T  
0.4989685624985712 0.8363814012196774 0.4043824635213893 T T T  
0.9998739286749798 0.6664004727557036 0.2034795393773452 T T T  
0.4997241100966123 0.6721823701580222 0.340477783564434 T T T  
0.0826144212767668 0.6665612651498681 0.2702900377247838 T T T  
0.0828136641505318 0.6636917694508931 0.4180025736516608 T T T  
0.1666700000000034 0.8333299999999996 0.0000000000000000 F F F  
0.1666700000000034 0.8333299999999996 0.1358099999999993 F F F  
0.1666700000000034 0.6666700000000034 0.0679000000000016 F F F  
0.2500000000000000 0.6666700000000034 0.0000000000000000 F F F  
0.2500000000000000 0.6666700000000034 0.1358099999999993 F F F  
0.1666888707868981 0.8348118801191386 0.2703035610110328 T T T  
0.1681045261149225 0.8344537763343025 0.4180349023901058 T T T  
0.1677606386648232 0.6645106576112529 0.2046132565023875 T T T  
0.1580015402662328 0.6840497166720708 0.3408527409065223 T T T  
0.2498115842174854 0.6676982987913828 0.2760632335842286 T T T  
0.2494330170109523 0.6671960532644243 0.3964214066285874 T T T  
0.3333399999999997 0.8333299999999996 0.0000000000000000 F F F  
0.3333399999999997 0.8333299999999996 0.1358099999999993 F F F  
0.3333399999999997 0.6666700000000034 0.0679000000000016 F F F  
0.4166600000000003 0.6666700000000034 0.0000000000000000 F F F  
0.4166600000000003 0.6666700000000034 0.1358099999999993 F F F  
0.3328575514706154 0.8349816404034357 0.2702178867089770 T T T  
0.3293790173521589 0.8356249952052249 0.4178522940476950 T T T  
0.3321307887733528 0.6644550138014252 0.2046318871648986 T T T

|                    |                    |                    |   |   |   |
|--------------------|--------------------|--------------------|---|---|---|
| 0.3413394915474836 | 0.6852033532122564 | 0.3408418639254623 | T | T | T |
| 0.4170596412851071 | 0.6667149067721854 | 0.2704036584913810 | T | T | T |
| 0.4156428994195400 | 0.6650316125733133 | 0.4178863366013362 | T | T | T |
| 0.3311826897059006 | 0.0019914713133833 | 0.4781468457570966 | T | T | T |
| 0.1670202355940364 | 0.0018692552874271 | 0.4782424812329355 | T | T | T |
| 0.1686250346181037 | 0.3415617902341724 | 0.4723584011038525 | T | T | T |
| 0.1039913218223941 | 0.2135338103167111 | 0.5127440033165006 | T | T | T |
| 0.3292306562052808 | 0.6630152362678516 | 0.4723320179333402 | T | T | T |
| 0.3932032351949836 | 0.7925025035804419 | 0.5126386035872986 | T | T | T |
| 0.3292064812513281 | 0.3413894216720115 | 0.4720981310792457 | T | T | T |
| 0.3932178710847876 | 0.2129730340205367 | 0.5125515395591115 | T | T | T |
| 0.1686933982298007 | 0.6625744208681976 | 0.4725596672303081 | T | T | T |
| 0.1041071804349335 | 0.7916614788740994 | 0.5129000983053849 | T | T | T |
| 0.2486208355762261 | 0.1770752512952985 | 0.5052613696583569 | T | T | T |
| 0.2486254373798027 | 0.8272765115081409 | 0.5056418054275302 | T | T | T |
| 0.4113629813810204 | 0.5026689972546243 | 0.5036033404585004 | T | T | T |
| 0.0863426267616783 | 0.5025092723388043 | 0.5055763403659240 | T | T | T |
| 0.4991297145294215 | 0.3372632625676926 | 0.4782698565146023 | T | T | T |
| 0.4991690530039035 | 0.6664960741097739 | 0.4781766249997861 | T | T | T |
| 0.5000000000000000 | 0.1666700000000034 | 0.0000000000000000 | F | F | F |
| 0.5000000000000000 | 0.1666700000000034 | 0.1358099999999993 | F | F | F |
| 0.5000000000000000 | 0.0000000000000000 | 0.0679000000000016 | F | F | F |
| 0.5833299999999966 | 0.0000000000000000 | 0.0000000000000000 | F | F | F |
| 0.5833299999999966 | 0.0000000000000000 | 0.1358099999999993 | F | F | F |
| 0.9997315737744302 | 0.1667727920838480 | 0.2713994834984113 | T | T | T |
| 0.9987807831764867 | 0.1683241016720361 | 0.4044418187237012 | T | T | T |
| 0.9997097815806876 | 0.0005962501785393 | 0.2033324857228649 | T | T | T |
| 0.9997851919269419 | 0.0005343907954434 | 0.3385689194463812 | T | T | T |
| 0.5829231162747723 | 0.0005065144899531 | 0.2709784405308057 | T | T | T |
| 0.5820146916219499 | 0.0022717488985952 | 0.4043980948617519 | T | T | T |
| 0.6666700000000034 | 0.1666700000000034 | 0.0000000000000000 | F | F | F |
| 0.6666700000000034 | 0.1666700000000034 | 0.1358099999999993 | F | F | F |
| 0.6666700000000034 | 0.0000000000000000 | 0.0679000000000016 | F | F | F |
| 0.7500000000000000 | 0.0000000000000000 | 0.0000000000000000 | F | F | F |
| 0.7500000000000000 | 0.0000000000000000 | 0.1358099999999993 | F | F | F |
| 0.6667136829085745 | 0.1659565595950658 | 0.2704148757750572 | T | T | T |
| 0.6681118374107986 | 0.1689310074520028 | 0.4179539221528941 | T | T | T |
| 0.6667805626817648 | 0.0003274035759923 | 0.2034838616842234 | T | T | T |
| 0.6640848302210217 | 0.0005580243683573 | 0.3404771591747069 | T | T | T |
| 0.7497978832710593 | 0.0004636805617000 | 0.2724951117601248 | T | T | T |
| 0.7484460039255203 | 0.0019232511419301 | 0.4009678665598748 | T | T | T |
| 0.8333399999999997 | 0.1666700000000034 | 0.0000000000000000 | F | F | F |
| 0.8333399999999997 | 0.1666700000000034 | 0.1358099999999993 | F | F | F |
| 0.8333399999999997 | 0.0000000000000000 | 0.0679000000000016 | F | F | F |
| 0.9166600000000003 | 0.0000000000000000 | 0.0000000000000000 | F | F | F |
| 0.9166600000000003 | 0.0000000000000000 | 0.1358099999999993 | F | F | F |
| 0.8328680732829787 | 0.1659119666235952 | 0.2702723742484023 | T | T | T |
| 0.8297192161869085 | 0.1681520078800843 | 0.4178301053417466 | T | T | T |
| 0.8330981042088740 | 0.0002829578096613 | 0.2035138429530190 | T | T | T |
| 0.8342659253862765 | 0.0008918469664582 | 0.3407142465527478 | T | T | T |
| 0.9166441825009041 | 0.0005279715557501 | 0.2713771583769544 | T | T | T |
| 0.9159480916727545 | 0.0026077206603276 | 0.4043781066625440 | T | T | T |
| 0.5000000000000000 | 0.5000000000000000 | 0.0000000000000000 | F | F | F |
| 0.5000000000000000 | 0.5000000000000000 | 0.1358099999999993 | F | F | F |
| 0.5000000000000000 | 0.3333299999999966 | 0.0679000000000016 | F | F | F |
| 0.5833299999999966 | 0.3333299999999966 | 0.0000000000000000 | F | F | F |
| 0.5833299999999966 | 0.3333299999999966 | 0.1358099999999993 | F | F | F |
| 0.4997908684834415 | 0.5005123085613585 | 0.2725249775315217 | T | T | T |
| 0.9991769672740670 | 0.5035453183252206 | 0.4009639463174445 | T | T | T |
| 0.4998461310872224 | 0.3338055875088517 | 0.2035401290595995 | T | T | T |
| 0.9995859903483727 | 0.3316151303566324 | 0.3407473471445079 | T | T | T |
| 0.5825432202344154 | 0.3344715754085463 | 0.2702172738138100 | T | T | T |
| 0.5823102837475574 | 0.3406543573794303 | 0.4179222728198927 | T | T | T |
| 0.6666700000000034 | 0.5000000000000000 | 0.0000000000000000 | F | F | F |
| 0.6666700000000034 | 0.5000000000000000 | 0.1358099999999993 | F | F | F |
| 0.6666700000000034 | 0.3333299999999966 | 0.0679000000000016 | F | F | F |
| 0.7500000000000000 | 0.3333299999999966 | 0.0000000000000000 | F | F | F |
| 0.7500000000000000 | 0.3333299999999966 | 0.1358099999999993 | F | F | F |
| 0.6662224022124936 | 0.5004574137206821 | 0.2760349999693809 | T | T | T |
| 0.6662941443108138 | 0.5012607149215568 | 0.3964035787138426 | T | T | T |

|                    |                    |                    |   |   |   |
|--------------------|--------------------|--------------------|---|---|---|
| 0.6677962893125916 | 0.3357883155387515 | 0.2046292737866509 | T | T | T |
| 0.6574340668338018 | 0.3174338702204973 | 0.3408539266016306 | T | T | T |
| 0.7497968958213730 | 0.3333407329413612 | 0.2762599397281054 | T | T | T |
| 0.7493964540743424 | 0.3353744209788508 | 0.3960175900320886 | T | T | T |
| 0.8333399999999997 | 0.5000000000000000 | 0.0000000000000000 | F | F | F |
| 0.8333399999999997 | 0.5000000000000000 | 0.1358099999999993 | F | F | F |
| 0.8333399999999997 | 0.3333299999999966 | 0.0679000000000016 | F | F | F |
| 0.9166600000000003 | 0.3333299999999966 | 0.0000000000000000 | F | F | F |
| 0.9166600000000003 | 0.3333299999999966 | 0.1358099999999993 | F | F | F |
| 0.8333838810026396 | 0.5004640897715916 | 0.2762474626960530 | T | T | T |
| 0.8325042404513603 | 0.5013331242328376 | 0.3960080551258608 | T | T | T |
| 0.8319953760601592 | 0.3360099451002577 | 0.2046403082922422 | T | T | T |
| 0.8418239109934788 | 0.3164368782352219 | 0.3408291148926334 | T | T | T |
| 0.9170617872190873 | 0.3342946744255689 | 0.2702585515506825 | T | T | T |
| 0.9160156697802531 | 0.3408920851439525 | 0.4178535114312513 | T | T | T |
| 0.5000000000000000 | 0.8333299999999966 | 0.0000000000000000 | F | F | F |
| 0.5000000000000000 | 0.8333299999999966 | 0.1358099999999993 | F | F | F |
| 0.5000000000000000 | 0.6666700000000034 | 0.0679000000000016 | F | F | F |
| 0.5833299999999966 | 0.6666700000000034 | 0.0000000000000000 | F | F | F |
| 0.5833299999999966 | 0.6666700000000034 | 0.1358099999999993 | F | F | F |
| 0.998009036958214  | 0.8342570581725850 | 0.2708894726495985 | T | T | T |
| 0.9989244807108515 | 0.8362132964132465 | 0.4043777462053690 | T | T | T |
| 0.4998676873475277 | 0.6664033875231974 | 0.2034882861807127 | T | T | T |
| 0.9997751506108058 | 0.6721205978915313 | 0.3404549070875488 | T | T | T |
| 0.5826190748084926 | 0.6665861509480315 | 0.2703225370062106 | T | T | T |
| 0.5828543797344482 | 0.6645920280768618 | 0.4178451758733842 | T | T | T |
| 0.6666700000000034 | 0.8333299999999966 | 0.0000000000000000 | F | F | F |
| 0.6666700000000034 | 0.8333299999999966 | 0.1358099999999993 | F | F | F |
| 0.6666700000000034 | 0.6666700000000034 | 0.0679000000000016 | F | F | F |
| 0.7500000000000000 | 0.6666700000000034 | 0.0000000000000000 | F | F | F |
| 0.7500000000000000 | 0.6666700000000034 | 0.1358099999999993 | F | F | F |
| 0.6667387659661566 | 0.8348189034185085 | 0.2702795287678738 | T | T | T |
| 0.6684853226744295 | 0.8346071749424788 | 0.4179294882688904 | T | T | T |
| 0.6677364603978456 | 0.6645510394622098 | 0.2046033456641803 | T | T | T |
| 0.6581145591337257 | 0.6840827029530427 | 0.3408024513598719 | T | T | T |
| 0.7498338410035327 | 0.6676908532740503 | 0.2760260672650540 | T | T | T |
| 0.7495348454737346 | 0.6671989848895811 | 0.3964088611264166 | T | T | T |
| 0.8333399999999997 | 0.8333299999999966 | 0.0000000000000000 | F | F | F |
| 0.8333399999999997 | 0.8333299999999966 | 0.1358099999999993 | F | F | F |
| 0.8333399999999997 | 0.6666700000000034 | 0.0679000000000016 | F | F | F |
| 0.9166600000000003 | 0.6666700000000034 | 0.0000000000000000 | F | F | F |
| 0.9166600000000003 | 0.6666700000000034 | 0.1358099999999993 | F | F | F |
| 0.8328518367466391 | 0.8349804720846623 | 0.2702183071683623 | T | T | T |
| 0.8296918594405767 | 0.8355878581606694 | 0.4178055951564693 | T | T | T |
| 0.8321256343525916 | 0.6644503297940030 | 0.2046218650836004 | T | T | T |
| 0.8413975568404084 | 0.6851932730350738 | 0.3408139350975810 | T | T | T |
| 0.9170689807901825 | 0.6666650362730359 | 0.2703837776064831 | T | T | T |
| 0.9156696024857798 | 0.6640903403181008 | 0.4179121361118345 | T | T | T |
| 0.8315222263456303 | 0.0020307229140107 | 0.4781253407443741 | T | T | T |
| 0.6673430606497173 | 0.0019192470649276 | 0.4781664334891638 | T | T | T |
| 0.6687916678386192 | 0.3415059439756189 | 0.4723419115202039 | T | T | T |
| 0.6041944037167171 | 0.2133637694665645 | 0.5126939266032782 | T | T | T |
| 0.8293809630236764 | 0.6628532643837493 | 0.4722998424463087 | T | T | T |
| 0.8935826472648678 | 0.7921260703621970 | 0.5125255623619851 | T | T | T |
| 0.8292554029179579 | 0.3415959715541306 | 0.4721052460627999 | T | T | T |
| 0.8934675700882307 | 0.2133063871294804 | 0.5124404173808317 | T | T | T |
| 0.6688982372855219 | 0.6629438352643764 | 0.4724645421233484 | T | T | T |
| 0.6045263435909306 | 0.7921789084706278 | 0.5128980625838266 | T | T | T |
| 0.7488582813292334 | 0.1769998706951663 | 0.5051773701784085 | T | T | T |
| 0.7490705194290127 | 0.8273475819610883 | 0.5055792143632524 | T | T | T |
| 0.9115372003804990 | 0.502680772092189  | 0.5051508969139379 | T | T | T |
| 0.5868148477088887 | 0.5031406465990528 | 0.5044509889718325 | T | T | T |
| 0.9990351408124212 | 0.3373854862015922 | 0.4781707485398362 | T | T | T |
| 0.9991424829739229 | 0.6657674055814851 | 0.4781714536879683 | T | T | T |
| 0.5099720575084364 | 0.5371698979384893 | 0.6059094863798982 | T | T | T |
| 0.4553130463911124 | 0.4672693915391744 | 0.6100542331508125 | T | T | T |
| 0.5636004731041387 | 0.4652767722742341 | 0.6121270399362742 | T | T | T |
| 0.4017344822200680 | 0.5409033579351299 | 0.6119477211596693 | T | T | T |
| 0.5094584616430111 | 0.6063386793570799 | 0.6317200360906984 | T | T | T |
| 0.5103981183397548 | 0.5789103380851059 | 0.5716137967884730 | T | T | T |



|                    |                    |                    |   |   |   |
|--------------------|--------------------|--------------------|---|---|---|
| 0.4532319424655060 | 0.4080266319856907 | 0.5804046121994597 | T | T | T |
| 0.4575217841194385 | 0.4130532703440175 | 0.6411875929739224 | T | T | T |
| 0.5662759760489687 | 0.4319590816267995 | 0.6476626756972783 | T | T | T |
| 0.5633395058584882 | 0.3913008152871179 | 0.5886861308605484 | T | T | T |
| 0.6024814507718048 | 0.5139450194996399 | 0.6049760705864888 | T | T | T |
| 0.3984876578106363 | 0.5848332672695239 | 0.6454705175897576 | T | T | T |
| 0.3628750139747086 | 0.4905910687810951 | 0.6068148339297346 | T | T | T |
| 0.4023917924684693 | 0.6070824121936356 | 0.5849914840213609 | T | T | T |

**C<sub>6</sub>H<sub>14</sub>··· SrTiO<sub>3</sub> (001)**

**Energy: -5345.010766 eV**

1.0000000000000000  
 23.3760000000000012 0.0000000000000000 0.0000000000000000  
 0.0000000000000000 11.6880000000000006 0.0000000000000000  
 0.0000000000000000 0.0000000000000000 28.6878999999999991

Sr Ti O C H

54 88 230 6 14

Selective dynamics

Direct

|                    |                    |                    |   |   |   |
|--------------------|--------------------|--------------------|---|---|---|
| 0.0833299999999966 | 0.1666700000000034 | 0.0679000000000016 | F | F | F |
| 0.0837614027549050 | 0.1674032593855012 | 0.2033715749629177 | T | T | T |
| 0.0821176410591150 | 0.1623044721098305 | 0.3408170624715325 | T | T | T |
| 0.2500000000000000 | 0.1666700000000034 | 0.0679000000000016 | F | F | F |
| 0.2499362282226406 | 0.1672631025791302 | 0.2037930669072812 | T | T | T |
| 0.2505234719066741 | 0.1632218863056062 | 0.3401192328440829 | T | T | T |
| 0.4166600000000003 | 0.1666700000000034 | 0.0679000000000016 | F | F | F |
| 0.4162999399260682 | 0.1673929096125976 | 0.2033507803793914 | T | T | T |
| 0.4184426187658667 | 0.1626512417615427 | 0.3401160815317418 | T | T | T |
| 0.0833299999999966 | 0.5000000000000000 | 0.0679000000000016 | F | F | F |
| 0.0836779149781644 | 0.5001277577595573 | 0.2037756148068403 | T | T | T |
| 0.0808607342391011 | 0.4986745957899748 | 0.3400695139446839 | T | T | T |
| 0.2500000000000000 | 0.5000000000000000 | 0.0679000000000016 | F | F | F |
| 0.2499867291551648 | 0.5000958303469712 | 0.2041758649243096 | T | T | T |
| 0.2495868322349973 | 0.5009776561372216 | 0.3361906612759682 | T | T | T |
| 0.4166600000000003 | 0.5000000000000000 | 0.0679000000000016 | F | F | F |
| 0.4164376344870998 | 0.5002250917183724 | 0.2038590229293534 | T | T | T |
| 0.4182641470805408 | 0.4988345912240337 | 0.3400364481087139 | T | T | T |
| 0.0833299999999966 | 0.8333299999999966 | 0.0679000000000016 | F | F | F |
| 0.0837574719235292 | 0.8326554520880961 | 0.2033992374264310 | T | T | T |
| 0.0820728661320808 | 0.8357749446477861 | 0.3413945801740685 | T | T | T |
| 0.2500000000000000 | 0.8333299999999966 | 0.0679000000000016 | F | F | F |
| 0.2499681611503960 | 0.8329758592220436 | 0.2038230199892826 | T | T | T |
| 0.2506347019523625 | 0.8386237373068726 | 0.3401959898472712 | T | T | T |
| 0.4166600000000003 | 0.8333299999999966 | 0.0679000000000016 | F | F | F |
| 0.4163494835531745 | 0.8326496299778425 | 0.2034361649512096 | T | T | T |
| 0.4188429089183708 | 0.8355546565875963 | 0.3409866518393977 | T | T | T |
| 0.5833299999999966 | 0.1666700000000034 | 0.0679000000000016 | F | F | F |
| 0.5837434544561726 | 0.1672492676696447 | 0.2034066327053025 | T | T | T |
| 0.5821959696118453 | 0.1622143457741921 | 0.3409720360436416 | T | T | T |
| 0.7500000000000000 | 0.1666700000000034 | 0.0679000000000016 | F | F | F |
| 0.7499022802981415 | 0.1670814168254335 | 0.2037560889345237 | T | T | T |
| 0.7506241421601662 | 0.1632130976340743 | 0.3399493589592066 | T | T | T |
| 0.9166600000000003 | 0.1666700000000034 | 0.0679000000000016 | F | F | F |
| 0.9162653998113622 | 0.1674406720694995 | 0.2033064710573953 | T | T | T |
| 0.9185720163459168 | 0.1626827598641704 | 0.3399165493410676 | T | T | T |
| 0.5833299999999966 | 0.5000000000000000 | 0.0679000000000016 | F | F | F |
| 0.5836116136017307 | 0.5001809968287220 | 0.2038578428248145 | T | T | T |
| 0.5807932361482320 | 0.4984761622855456 | 0.3400958483461057 | T | T | T |
| 0.7500000000000000 | 0.5000000000000000 | 0.0679000000000016 | F | F | F |
| 0.7499610393380196 | 0.5001760747335523 | 0.2040922493477363 | T | T | T |
| 0.7494989419642474 | 0.5011063828448779 | 0.3360491855172784 | T | T | T |
| 0.9166600000000003 | 0.5000000000000000 | 0.0679000000000016 | F | F | F |
| 0.9164563944005919 | 0.5001524254829232 | 0.2037298710488254 | T | T | T |
| 0.9184935133459747 | 0.4987463375725520 | 0.3398069655606758 | T | T | T |
| 0.5833299999999966 | 0.8333299999999966 | 0.0679000000000016 | F | F | F |
| 0.5837339832727225 | 0.8325393404053445 | 0.2034262063406451 | T | T | T |
| 0.5820795303140863 | 0.8354373349401820 | 0.3416354807934056 | T | T | T |
| 0.7500000000000000 | 0.8333299999999966 | 0.0679000000000016 | F | F | F |
| 0.7499396554685733 | 0.8328106324561524 | 0.2037796694510188 | T | T | T |

|                    |                     |                    |   |   |   |
|--------------------|---------------------|--------------------|---|---|---|
| 0.7506466171273948 | 0.8382123736260189  | 0.3401405727115900 | T | T | T |
| 0.9166600000000003 | 0.8333299999999966  | 0.0679000000000016 | F | F | F |
| 0.9163182905395386 | 0.8325819187816981  | 0.2033776258593120 | T | T | T |
| 0.9188877049806166 | 0.8357088881691072  | 0.3407518624438413 | T | T | T |
| 0.0000000000000000 | 0.0000000000000000  | 0.0000000000000000 | F | F | F |
| 0.0000000000000000 | 0.0000000000000000  | 0.1358099999999993 | F | F | F |
| 0.0001839747974637 | 0.9996910937537496  | 0.2698133039247639 | T | T | T |
| 0.0028712180955260 | 0.9940377063837244  | 0.4033476185263560 | T | T | T |
| 0.1666700000000034 | 0.0000000000000000  | 0.0000000000000000 | F | F | F |
| 0.1666700000000034 | 0.0000000000000000  | 0.1358099999999993 | F | F | F |
| 0.1665176008095336 | -0.0000319767603437 | 0.2716252296219439 | T | T | T |
| 0.1698477485293211 | 0.0012042102314237  | 0.4092775410896478 | T | T | T |
| 0.3333399999999997 | 0.0000000000000000  | 0.0000000000000000 | F | F | F |
| 0.3333399999999997 | 0.0000000000000000  | 0.1358099999999993 | F | F | F |
| 0.3335969863629627 | -0.0001069003575113 | 0.2715468979303367 | T | T | T |
| 0.3375221329609510 | 0.0014803049973738  | 0.4095057563772641 | T | T | T |
| 0.0000000000000000 | 0.3333299999999966  | 0.0000000000000000 | F | F | F |
| 0.0000000000000000 | 0.3333299999999966  | 0.1358099999999993 | F | F | F |
| 0.0000788021980056 | 0.3328684147859628  | 0.2714608948453653 | T | T | T |
| 0.4990689104133903 | 0.3241247064131105  | 0.4092931456456822 | T | T | T |
| 0.1666700000000034 | 0.3333299999999966  | 0.0000000000000000 | F | F | F |
| 0.1666700000000034 | 0.3333299999999966  | 0.1358099999999993 | F | F | F |
| 0.1656277144090282 | 0.3312302167812551  | 0.2733434909150858 | T | T | T |
| 0.1709253232541589 | 0.3442144301179731  | 0.4076553416782679 | T | T | T |
| 0.3333399999999997 | 0.3333299999999966  | 0.0000000000000000 | F | F | F |
| 0.3333399999999997 | 0.3333299999999966  | 0.1358099999999993 | F | F | F |
| 0.3343436014110850 | 0.3312569188992204  | 0.2733163932999802 | T | T | T |
| 0.3276356703766771 | 0.3445944343569832  | 0.4075915781632194 | T | T | T |
| 0.0000000000000000 | 0.6666700000000034  | 0.0000000000000000 | F | F | F |
| 0.0000000000000000 | 0.6666700000000034  | 0.1358099999999993 | F | F | F |
| 0.0000734503427857 | 0.6670314809019490  | 0.2715809670357039 | T | T | T |
| 0.4993126189997552 | 0.6591463671900135  | 0.4091532934485115 | T | T | T |
| 0.1666700000000034 | 0.6666700000000034  | 0.0000000000000000 | F | F | F |
| 0.1666700000000034 | 0.6666700000000034  | 0.1358099999999993 | F | F | F |
| 0.1655738798891504 | 0.6689515777287930  | 0.2733503433485527 | T | T | T |
| 0.1710321126237166 | 0.6578410330146238  | 0.4076759278805664 | T | T | T |
| 0.3333399999999997 | 0.6666700000000034  | 0.0000000000000000 | F | F | F |
| 0.3333399999999997 | 0.6666700000000034  | 0.1358099999999993 | F | F | F |
| 0.3343525716433497 | 0.6688131684936223  | 0.2733300968929238 | T | T | T |
| 0.3277816236157189 | 0.6582065090817846  | 0.4076999410473659 | T | T | T |
| 0.1730976235248994 | 0.1712350183855325  | 0.4852542990385833 | T | T | T |
| 0.3237210237111494 | 0.8330964181301465  | 0.4853892863567838 | T | T | T |
| 0.4143984530145817 | 0.3515175197527263  | 0.4850093658315004 | T | T | T |
| 0.0836291727823906 | 0.6531487099446602  | 0.4853766878731348 | T | T | T |
| 0.1733026745066976 | 0.8326438194787495  | 0.4854045723787682 | T | T | T |
| 0.3238277171996641 | 0.1713849916109329  | 0.4852092467574233 | T | T | T |
| 0.4144200892179323 | 0.6541586699424310  | 0.4851162630408736 | T | T | T |
| 0.0834676979626105 | 0.3523447767421215  | 0.4851926263999355 | T | T | T |
| 0.5000000000000000 | 0.0000000000000000  | 0.0000000000000000 | F | F | F |
| 0.5000000000000000 | 0.0000000000000000  | 0.1358099999999993 | F | F | F |
| 0.5001884937485581 | -0.0002886296843980 | 0.2699526437109457 | T | T | T |
| 0.5029512008819287 | 0.9938354796883425  | 0.4035056452329769 | T | T | T |
| 0.6666700000000034 | 0.0000000000000000  | 0.0000000000000000 | F | F | F |
| 0.6666700000000034 | 0.0000000000000000  | 0.1358099999999993 | F | F | F |
| 0.6664723597611206 | -0.0001309786422728 | 0.2716136954731835 | T | T | T |
| 0.6701680721820017 | 0.0011318494101376  | 0.4091159005217592 | T | T | T |
| 0.8333399999999997 | 0.0000000000000000  | 0.0000000000000000 | F | F | F |
| 0.8333399999999997 | 0.0000000000000000  | 0.1358099999999993 | F | F | F |
| 0.8335440705687651 | -0.0000373104430777 | 0.2714721582219512 | T | T | T |
| 0.8375918830628741 | 0.0014034876660060  | 0.4094156993195001 | T | T | T |
| 0.5000000000000000 | 0.3333299999999966  | 0.0000000000000000 | F | F | F |
| 0.5000000000000000 | 0.3333299999999966  | 0.1358099999999993 | F | F | F |
| 0.5000227791674597 | 0.3328808583852268  | 0.2714713459573883 | T | T | T |
| 0.9992145030464821 | 0.3245764339624014  | 0.4093897771229144 | T | T | T |
| 0.6666700000000034 | 0.3333299999999966  | 0.0000000000000000 | F | F | F |
| 0.6666700000000034 | 0.3333299999999966  | 0.1358099999999993 | F | F | F |
| 0.6655936367434525 | 0.3311825829533612  | 0.2733176310970353 | T | T | T |
| 0.6711479973633305 | 0.3442188485256742  | 0.4075823647713813 | T | T | T |
| 0.8333399999999997 | 0.3333299999999966  | 0.0000000000000000 | F | F | F |
| 0.8333399999999997 | 0.3333299999999966  | 0.1358099999999993 | F | F | F |

|                     |                    |                    |   |   |   |
|---------------------|--------------------|--------------------|---|---|---|
| 0.8343201010023824  | 0.3313704002286690 | 0.2732366862633192 | T | T | T |
| 0.8278502149593463  | 0.3444513711510767 | 0.4074483676595097 | T | T | T |
| 0.5000000000000000  | 0.6666700000000034 | 0.0000000000000000 | F | F | F |
| 0.5000000000000000  | 0.6666700000000034 | 0.1358099999999993 | F | F | F |
| 0.4999808839039794  | 0.6670333434200920 | 0.2716506701885289 | T | T | T |
| 0.9993867289753166  | 0.6596059463722055 | 0.4092085551461834 | T | T | T |
| 0.6666700000000034  | 0.6666700000000034 | 0.0000000000000000 | F | F | F |
| 0.6666700000000034  | 0.6666700000000034 | 0.1358099999999993 | F | F | F |
| 0.6655328738882882  | 0.6688862685073396 | 0.2733153607614283 | T | T | T |
| 0.6712592604449450  | 0.6578276192620268 | 0.4076587924929906 | T | T | T |
| 0.8333399999999997  | 0.6666700000000034 | 0.0000000000000000 | F | F | F |
| 0.8333399999999997  | 0.6666700000000034 | 0.1358099999999993 | F | F | F |
| 0.8343829336034976  | 0.6688897036825182 | 0.2732782486080593 | T | T | T |
| 0.8281215746499935  | 0.6578872657887836 | 0.4075605268183149 | T | T | T |
| 0.6733443067669507  | 0.1711441972051493 | 0.4851020333336548 | T | T | T |
| 0.8238657671114225  | 0.8327980959355191 | 0.4851907992032954 | T | T | T |
| 0.9143393666894558  | 0.3521517665279803 | 0.4850868488488562 | T | T | T |
| 0.5835960601603439  | 0.6543736546469362 | 0.4849211214182910 | T | T | T |
| 0.6736386059310594  | 0.8329392429099358 | 0.4853016567865956 | T | T | T |
| 0.8239703221103589  | 0.1713484378164983 | 0.4850774392065744 | T | T | T |
| 0.9143571382825240  | 0.6536464235056385 | 0.4852661361170340 | T | T | T |
| 0.5832681174651899  | 0.3513921937878738 | 0.4846551974862330 | T | T | T |
| 0.0000000000000000  | 0.1666700000000034 | 0.0000000000000000 | F | F | F |
| 0.0000000000000000  | 0.1666700000000034 | 0.1358099999999993 | F | F | F |
| 0.0000000000000000  | 0.0000000000000000 | 0.0679000000000016 | F | F | F |
| 0.0833299999999966  | 0.0000000000000000 | 0.0000000000000000 | F | F | F |
| 0.0833299999999966  | 0.0000000000000000 | 0.1358099999999993 | F | F | F |
| 0.4996701065278424  | 0.1668143918280590 | 0.2713707178897519 | T | T | T |
| 0.4985582363164807  | 0.1679296174780285 | 0.4045233317608232 | T | T | T |
| 0.4996418062960304  | 0.0004173410249005 | 0.2033823435161819 | T | T | T |
| 0.4997643520125157  | 0.0005026498287786 | 0.3386510020659702 | T | T | T |
| 0.0828632430041456  | 0.0005806547419244 | 0.2708322040888547 | T | T | T |
| 0.0818348362828961  | 0.0022682696956721 | 0.4043405332996259 | T | T | T |
| 0.1666700000000034  | 0.1666700000000034 | 0.0000000000000000 | F | F | F |
| 0.1666700000000034  | 0.1666700000000034 | 0.1358099999999993 | F | F | F |
| 0.1666700000000034  | 0.0000000000000000 | 0.0679000000000016 | F | F | F |
| 0.2500000000000000  | 0.0000000000000000 | 0.0000000000000000 | F | F | F |
| 0.2500000000000000  | 0.0000000000000000 | 0.1358099999999993 | F | F | F |
| 0.1667429074111176  | 0.1659947251802710 | 0.2704380774259381 | T | T | T |
| 0.1678488458086589  | 0.1688952983251354 | 0.4179928617983882 | T | T | T |
| 0.1668135508062890  | 0.0003749310796956 | 0.2034829117874919 | T | T | T |
| 0.1638470878770708  | 0.0005244492628264 | 0.3404503266672834 | T | T | T |
| 0.2497601820365039  | 0.0004173015372437 | 0.2725545517731367 | T | T | T |
| 0.2479828051462681  | 0.0017347472819136 | 0.4010723440123116 | T | T | T |
| 0.3333399999999997  | 0.1666700000000034 | 0.0000000000000000 | F | F | F |
| 0.3333399999999997  | 0.1666700000000034 | 0.1358099999999993 | F | F | F |
| 0.3333399999999997  | 0.0000000000000000 | 0.0679000000000016 | F | F | F |
| 0.4166600000000003  | 0.0000000000000000 | 0.0000000000000000 | F | F | F |
| 0.4166600000000003  | 0.0000000000000000 | 0.1358099999999993 | F | F | F |
| 0.3328405816334582  | 0.1659547901757114 | 0.2703954903948262 | T | T | T |
| 0.3293540822722194  | 0.1680840257148888 | 0.4179691835641297 | T | T | T |
| 0.3331086890833840  | 0.0004195413119265 | 0.2035487913616758 | T | T | T |
| 0.3340829042411724  | 0.0008309844567090 | 0.3408103397328920 | T | T | T |
| 0.4165925996445704  | 0.0007578923592253 | 0.2714744057355607 | T | T | T |
| 0.4157184863988381  | 0.0025265047626624 | 0.4044614460644005 | T | T | T |
| 0.0000000000000000  | 0.5000000000000000 | 0.0000000000000000 | F | F | F |
| 0.0000000000000000  | 0.5000000000000000 | 0.1358099999999993 | F | F | F |
| 0.0000000000000000  | 0.3333299999999966 | 0.0679000000000016 | F | F | F |
| 0.0833299999999966  | 0.3333299999999966 | 0.0000000000000000 | F | F | F |
| 0.0833299999999966  | 0.3333299999999966 | 0.1358099999999993 | F | F | F |
| -0.0001180940440197 | 0.5004647471352622 | 0.2724513600993252 | T | T | T |
| 0.4992401277881404  | 0.5032155040637013 | 0.4012867360851998 | T | T | T |
| 0.9998881446312844  | 0.3337557984914646 | 0.2035039043270084 | T | T | T |
| 0.4994582681300092  | 0.3314984548166418 | 0.3408443686521889 | T | T | T |
| 0.0825610294316416  | 0.3343592651528784 | 0.2702111309698392 | T | T | T |
| 0.0821615318454782  | 0.3408727777505526 | 0.4178765475287536 | T | T | T |
| 0.1666700000000034  | 0.5000000000000000 | 0.0000000000000000 | F | F | F |
| 0.1666700000000034  | 0.5000000000000000 | 0.1358099999999993 | F | F | F |
| 0.1666700000000034  | 0.3333299999999966 | 0.0679000000000016 | F | F | F |
| 0.2500000000000000  | 0.3333299999999966 | 0.0000000000000000 | F | F | F |

0.2500000000000000 0.3333299999999966 0.1358099999999993 F F F  
0.1662201034926998 0.5005186562539894 0.2761028031906206 T T T  
0.1662663762684746 0.5012314104569178 0.3964160695992999 T T T  
0.1678467840221290 0.3358742510435633 0.2046476335966048 T T T  
0.1573767943616086 0.3174182480882132 0.3408737314323309 T T T  
0.2497735508337974 0.3334259682841227 0.2763191938782539 T T T  
0.2492509212511066 0.3353723404707199 0.3961989476286876 T T T  
0.3333399999999997 0.5000000000000000 0.0000000000000000 F F F  
0.3333399999999997 0.5000000000000000 0.1358099999999993 F F F  
0.3333399999999997 0.3333299999999966 0.0679000000000016 F F F  
0.4166600000000003 0.3333299999999966 0.0000000000000000 F F F  
0.4166600000000003 0.3333299999999966 0.1358099999999993 F F F  
0.3333794854269702 0.5005118398713126 0.2763633982753328 T T T  
0.3323808649384626 0.5014428633818864 0.3962539400077432 T T T  
0.3320526491016214 0.3360408870193361 0.2046760215960795 T T T  
0.3416575522115773 0.3165915280398290 0.3409452346691723 T T T  
0.4170276857666814 0.3344004298212129 0.2704280394171851 T T T  
0.4159028727838700 0.3400766306870147 0.4178031520059272 T T T  
0.0000000000000000 0.8333299999999966 0.0000000000000000 F F F  
0.0000000000000000 0.8333299999999966 0.1358099999999993 F F F  
0.0000000000000000 0.6666700000000034 0.0679000000000016 F F F  
0.0833299999999966 0.6666700000000034 0.0000000000000000 F F F  
0.0833299999999966 0.6666700000000034 0.1358099999999993 F F F  
0.4996777999650149 0.8341433859480466 0.2710558783276616 T T T  
0.4988419463766138 0.8363052619122113 0.4044915622881393 T T T  
0.9999298795904102 0.6664330048844538 0.2034709923991860 T T T  
0.4995880148542141 0.6717271683328019 0.3406043940520449 T T T  
0.0826447554401026 0.6666816491107856 0.2703249739805532 T T T  
0.0827236991349276 0.6636412677812913 0.4180306522195248 T T T  
0.1666700000000034 0.8333299999999966 0.0000000000000000 F F F  
0.1666700000000034 0.8333299999999966 0.1358099999999993 F F F  
0.1666700000000034 0.6666700000000034 0.0679000000000016 F F F  
0.2500000000000000 0.6666700000000034 0.0000000000000000 F F F  
0.2500000000000000 0.6666700000000034 0.1358099999999993 F F F  
0.1666908406529576 0.8348648343170897 0.2702656092046508 T T T  
0.1679444188866995 0.8344533481755572 0.4180663708999979 T T T  
0.1678238655578322 0.6644866300588883 0.2046182804549377 T T T  
0.1579810554978042 0.6841943679199001 0.3408747865897578 T T T  
0.2498491669664518 0.6677851187477897 0.2761438607902710 T T T  
0.2493740587085548 0.6674129284611358 0.3964918243320833 T T T  
0.3333399999999997 0.8333299999999966 0.0000000000000000 F F F  
0.3333399999999997 0.8333299999999966 0.1358099999999993 F F F  
0.3333399999999997 0.6666700000000034 0.0679000000000016 F F F  
0.4166600000000003 0.6666700000000034 0.0000000000000000 F F F  
0.4166600000000003 0.6666700000000034 0.1358099999999993 F F F  
0.3329500267399474 0.8349940252047857 0.2702875789045484 T T T  
0.3294572271462108 0.8356758515303973 0.4179850961659968 T T T  
0.3321457918858658 0.6644173105957254 0.2046708145443215 T T T  
0.3413398261957361 0.6851693521299820 0.3409388876659095 T T T  
0.4170321050450645 0.6666034454980921 0.2704667361750006 T T T  
0.4155812383440255 0.6644940502036549 0.4179696657226788 T T T  
0.3312685072988157 0.0020303185348984 0.4783013409157395 T T T  
0.1668245488512274 0.0019127253902043 0.4782186790173405 T T T  
0.1685409732488521 0.3415441809171978 0.4723666477480384 T T T  
0.1038952328603928 0.2133108762830851 0.5126152242693602 T T T  
0.3292055367171169 0.6631563205093041 0.4724157161782533 T T T  
0.3931754378432348 0.7923163130652213 0.5128589997359507 T T T  
0.3291720134261887 0.3414718821193479 0.4722066725860813 T T T  
0.3932411317093925 0.2129219684567123 0.5126250269461543 T T T  
0.1686339340211543 0.6626290764899863 0.4725681283249042 T T T  
0.1040612492919749 0.7916254817761909 0.5129333792872085 T T T  
0.2485732390114266 0.1769461395070255 0.5052917253207366 T T T  
0.2485603590510547 0.8275837160160074 0.5057048169342732 T T T  
0.4114007414395239 0.5025704653778277 0.5037624017245773 T T T  
0.0862425812831050 0.5024600188652814 0.5055690007050008 T T T  
0.4989772265303395 0.3364959919902643 0.4782154619513190 T T T  
0.4990419178084310 0.6667044252978406 0.4782021917122862 T T T  
0.5000000000000000 0.1666700000000034 0.0000000000000000 F F F  
0.5000000000000000 0.1666700000000034 0.1358099999999993 F F F  
0.5000000000000000 0.0000000000000000 0.0679000000000016 F F F

0.5833299999999966 0.0000000000000000 0.0000000000000000 F F F  
0.5833299999999966 0.0000000000000000 0.1358099999999993 F F F  
0.9997583686074184 0.1667633796003908 0.2713964123294999 T T T  
0.9987108704278493 0.1682597478792976 0.4043485025390411 T T T  
0.9997121457388823 0.0005567851166143 0.2033114861086238 T T T  
0.9996902795332571 0.0004908424454736 0.3385408177542980 T T T  
0.5828309553093848 0.0005681495594673 0.2708221080422092 T T T  
0.5819481983573218 0.0022414839557658 0.4044116560482544 T T T  
0.6666700000000034 0.1666700000000034 0.0000000000000000 F F F  
0.6666700000000034 0.1666700000000034 0.1358099999999993 F F F  
0.6666700000000034 0.0000000000000000 0.0679000000000016 F F F  
0.7500000000000000 0.0000000000000000 0.0000000000000000 F F F  
0.7500000000000000 0.0000000000000000 0.1358099999999993 F F F  
0.6667040093079278 0.1659115684878899 0.2703770226286187 T T T  
0.6682010657308503 0.1688122342734383 0.4178240879890109 T T T  
0.6668010151697934 0.0003626830905044 0.2034539774836814 T T T  
0.6638392576543297 0.0003378466199940 0.3403766140840975 T T T  
0.7497284362231761 0.0003515271926723 0.2725247523590164 T T T  
0.7482661112309277 0.0016999745874167 0.4008339536161228 T T T  
0.8333399999999997 0.1666700000000034 0.0000000000000000 F F F  
0.8333399999999997 0.1666700000000034 0.1358099999999993 F F F  
0.8333399999999997 0.0000000000000000 0.0679000000000016 F F F  
0.9166600000000003 0.0000000000000000 0.0000000000000000 F F F  
0.9166600000000003 0.0000000000000000 0.1358099999999993 F F F  
0.8328361725887977 0.1658782805767596 0.2702536361867092 T T T  
0.8295215474879879 0.1680838762410040 0.4178018361067891 T T T  
0.8330008252938449 0.0002875253249030 0.2035037817846112 T T T  
0.8342260739778203 0.0007706694760037 0.3406878373377382 T T T  
0.9166121976326956 0.0005567698743891 0.2712865607208645 T T T  
0.9158357768505898 0.0024754600299402 0.4043930385585472 T T T  
0.5000000000000000 0.5000000000000000 0.0000000000000000 F F F  
0.5000000000000000 0.5000000000000000 0.1358099999999993 F F F  
0.5000000000000000 0.3333299999999966 0.0679000000000016 F F F  
0.5833299999999966 0.3333299999999966 0.0000000000000000 F F F  
0.5833299999999966 0.3333299999999966 0.1358099999999993 F F F  
0.4997817530071353 0.5004413858473232 0.2725595579675613 T T T  
0.9990594239111967 0.5035637694772724 0.4010033040513059 T T T  
0.4997895479337113 0.3340078588033520 0.2035568624257479 T T T  
0.9995985081623251 0.3316994172307816 0.3407361140926159 T T T  
0.5824799534096382 0.3342619277977402 0.2702859346253391 T T T  
0.5821513903625485 0.3392936567021518 0.4175552792884014 T T T  
0.6666700000000034 0.5000000000000000 0.0000000000000000 F F F  
0.6666700000000034 0.5000000000000000 0.1358099999999993 F F F  
0.6666700000000034 0.3333299999999966 0.0679000000000016 F F F  
0.7500000000000000 0.3333299999999966 0.0000000000000000 F F F  
0.7500000000000000 0.3333299999999966 0.1358099999999993 F F F  
0.6660979623339474 0.5004204902614537 0.2760728106672612 T T T  
0.6660739470860223 0.5012000976592640 0.3963696478230182 T T T  
0.6676916515639268 0.3358582081027883 0.2046284333797764 T T T  
0.6575229210973145 0.3173601557672834 0.3407789660737889 T T T  
0.7497783042208980 0.3333896996827840 0.2761763693147073 T T T  
0.7494014990479790 0.3355246547683544 0.3959796039285933 T T T  
0.8333399999999997 0.5000000000000000 0.0000000000000000 F F F  
0.8333399999999997 0.5000000000000000 0.1358099999999993 F F F  
0.8333399999999997 0.3333299999999966 0.0679000000000016 F F F  
0.9166600000000003 0.3333299999999966 0.0000000000000000 F F F  
0.9166600000000003 0.3333299999999966 0.1358099999999993 F F F  
0.8333769708605347 0.5004657944467793 0.2762430186428224 T T T  
0.8325683754724693 0.5013164157581871 0.3959336512385767 T T T  
0.8319972686467375 0.3359579097163609 0.2046201569603656 T T T  
0.8418257986655914 0.3164069031870588 0.3407911240525244 T T T  
0.9170799578721380 0.3343092038196644 0.2702211659449220 T T T  
0.9159755740376007 0.3406959020576518 0.4178332052278982 T T T  
0.5000000000000000 0.8333299999999966 0.0000000000000000 F F F  
0.5000000000000000 0.8333299999999966 0.1358099999999993 F F F  
0.5000000000000000 0.6666700000000034 0.0679000000000016 F F F  
0.5833299999999966 0.6666700000000034 0.0000000000000000 F F F  
0.5833299999999966 0.6666700000000034 0.1358099999999993 F F F  
0.9997722451391466 0.8342646599785878 0.2708630033609235 T T T  
0.9988492254483481 0.8361995082435006 0.4042876760288364 T T T

|                    |                    |                    |   |   |   |
|--------------------|--------------------|--------------------|---|---|---|
| 0.4998873301055246 | 0.6662926274060548 | 0.2035260187438035 | T | T | T |
| 0.9997563987283046 | 0.6720029158320492 | 0.3404419813988975 | T | T | T |
| 0.5825501119270829 | 0.6666472147898479 | 0.2704979942441417 | T | T | T |
| 0.5827182925568617 | 0.6649054194587606 | 0.4178037588759264 | T | T | T |
| 0.6666700000000034 | 0.8333299999999966 | 0.0000000000000000 | F | F | F |
| 0.6666700000000034 | 0.8333299999999966 | 0.1358099999999993 | F | F | F |
| 0.6666700000000034 | 0.6666700000000034 | 0.0679000000000016 | F | F | F |
| 0.7500000000000000 | 0.6666700000000034 | 0.0000000000000000 | F | F | F |
| 0.7500000000000000 | 0.6666700000000034 | 0.1358099999999993 | F | F | F |
| 0.6666466302876368 | 0.8347737834881716 | 0.2701878483805816 | T | T | T |
| 0.6683151404137931 | 0.8344516689623616 | 0.4178896434545483 | T | T | T |
| 0.6676271297654147 | 0.6643950534906344 | 0.2046075016384717 | T | T | T |
| 0.6582151460428768 | 0.6841457266155095 | 0.3408478105558598 | T | T | T |
| 0.7497943882844857 | 0.6676147776685347 | 0.2759856490092087 | T | T | T |
| 0.7495115202021607 | 0.6668892223608411 | 0.3964912070685100 | T | T | T |
| 0.8333399999999997 | 0.8333299999999966 | 0.0000000000000000 | F | F | F |
| 0.8333399999999997 | 0.8333299999999966 | 0.1358099999999993 | F | F | F |
| 0.8333399999999997 | 0.6666700000000034 | 0.0679000000000016 | F | F | F |
| 0.9166600000000003 | 0.6666700000000034 | 0.0000000000000000 | F | F | F |
| 0.9166600000000003 | 0.6666700000000034 | 0.1358099999999993 | F | F | F |
| 0.8328630404436697 | 0.8349333105507679 | 0.2701722095875206 | T | T | T |
| 0.8294947858349274 | 0.8354584314092132 | 0.4178193697421923 | T | T | T |
| 0.8320994407418250 | 0.6644177965954250 | 0.2046073925773962 | T | T | T |
| 0.8413723845457076 | 0.6852479403130595 | 0.3407925705431685 | T | T | T |
| 0.9170657702280683 | 0.6665516683852177 | 0.2703518686347241 | T | T | T |
| 0.9155734576411072 | 0.6641872891440920 | 0.4179881640486722 | T | T | T |
| 0.8313499230004289 | 0.0020085119951722 | 0.4781085793928875 | T | T | T |
| 0.6673849836252886 | 0.0018576964723214 | 0.4780462947625923 | T | T | T |
| 0.6687360922127029 | 0.3413431826455942 | 0.4722382338350044 | T | T | T |
| 0.6041850372910541 | 0.2124011398400787 | 0.5123466541326375 | T | T | T |
| 0.8292599616051777 | 0.6626622723275714 | 0.4723030758129508 | T | T | T |
| 0.8932912771149638 | 0.7919098803045183 | 0.5127351997862366 | T | T | T |
| 0.8292447262176311 | 0.3416712345941512 | 0.4720541898098780 | T | T | T |
| 0.8934089703413280 | 0.2133702401186009 | 0.5124267352544433 | T | T | T |
| 0.6687369719672527 | 0.6629896526882501 | 0.4725589730765006 | T | T | T |
| 0.6043489815839023 | 0.7932185917534821 | 0.5126204943609219 | T | T | T |
| 0.7488683039708902 | 0.1771603430277610 | 0.5052568118746360 | T | T | T |
| 0.7490068688031539 | 0.8272077462789309 | 0.5057480918819055 | T | T | T |
| 0.9115009034509018 | 0.5026699101713115 | 0.5052095954049659 | T | T | T |
| 0.5863108609422949 | 0.5025946571208869 | 0.5026569432235989 | T | T | T |
| 0.9989653580241356 | 0.3371843700236895 | 0.4781716853866831 | T | T | T |
| 0.9990575373865723 | 0.6658934344058597 | 0.4782190261769753 | T | T | T |
| 0.5144046166213232 | 0.5370932477720590 | 0.6075928677224970 | T | T | T |
| 0.5700158472098157 | 0.4698948923697611 | 0.6087004356008435 | T | T | T |
| 0.4611123719672082 | 0.4625703205742995 | 0.6089503316235773 | T | T | T |
| 0.6230875206160605 | 0.5449995677390052 | 0.6052850684312171 | T | T | T |
| 0.4063510468196488 | 0.5321925666838762 | 0.6127187060482135 | T | T | T |
| 0.6771368112844335 | 0.4784526278731652 | 0.5937916048166111 | T | T | T |
| 0.5134534732333803 | 0.5979813247443513 | 0.6367140647119423 | T | T | T |
| 0.5131285046288531 | 0.5893043460213861 | 0.5756853297695430 | T | T | T |
| 0.5699484777025715 | 0.4076651175540036 | 0.5799749574470624 | T | T | T |
| 0.5720123573204088 | 0.4185330668440839 | 0.6406820180367243 | T | T | T |
| 0.4603431958370165 | 0.4095296034152512 | 0.5773640821861948 | T | T | T |
| 0.4638613220232928 | 0.4025881551099423 | 0.6382259418996464 | T | T | T |
| 0.6162650388979574 | 0.6109081537986987 | 0.5785845455057005 | T | T | T |
| 0.6283951569977156 | 0.5921323410229139 | 0.6380393867468861 | T | T | T |
| 0.4027423969587669 | 0.5717880989903189 | 0.6471193439873023 | T | T | T |
| 0.3682933724455943 | 0.4800352746251585 | 0.6067900222417085 | T | T | T |
| 0.4056746982743472 | 0.6014117883162010 | 0.5870514651844944 | T | T | T |
| 0.6845227620779430 | 0.4102513846818636 | 0.6191924196344297 | T | T | T |
| 0.6739211413172010 | 0.4392248014307773 | 0.5592773941295505 | T | T | T |
| 0.7147922925870603 | 0.5337605617471898 | 0.5934763053586479 | T | T | T |

**C<sub>8</sub>H<sub>18</sub>··· SrTiO<sub>3</sub> (001)**

**Energy: -5379.916436 eV**

|                     |                     |                     |
|---------------------|---------------------|---------------------|
| 1.0000000000000000  |                     |                     |
| 23.3760000000000012 | 0.0000000000000000  | 0.0000000000000000  |
| 0.0000000000000000  | 11.6880000000000006 | 0.0000000000000000  |
| 0.0000000000000000  | 0.0000000000000000  | 28.6878999999999991 |

Sr Ti O C H  
54 88 230 8 18

Selective dynamics

Direct

|                    |                     |                    |   |   |   |
|--------------------|---------------------|--------------------|---|---|---|
| 0.0833299999999966 | 0.1666700000000034  | 0.0679000000000016 | F | F | F |
| 0.0837452354713187 | 0.1674032330599360  | 0.2033859970343449 | T | T | T |
| 0.0821603869065353 | 0.1623432460392814  | 0.3408877143545392 | T | T | T |
| 0.2500000000000000 | 0.1666700000000034  | 0.0679000000000016 | F | F | F |
| 0.2499254225618225 | 0.1671494826188174  | 0.2037792620470235 | T | T | T |
| 0.2505235048037678 | 0.1633077239702942  | 0.3399655184069794 | T | T | T |
| 0.4166600000000003 | 0.1666700000000034  | 0.0679000000000016 | F | F | F |
| 0.4162967641228320 | 0.1673491129776402  | 0.2033738115826297 | T | T | T |
| 0.4185132756799178 | 0.1627835670185022  | 0.3401184427801347 | T | T | T |
| 0.0833299999999966 | 0.5000000000000000  | 0.0679000000000016 | F | F | F |
| 0.0835796756724557 | 0.5001461317996402  | 0.2037935150525357 | T | T | T |
| 0.0807812848600486 | 0.4989060909598714  | 0.3400804950165764 | T | T | T |
| 0.2500000000000000 | 0.5000000000000000  | 0.0679000000000016 | F | F | F |
| 0.2499327645734160 | 0.5000350284471542  | 0.2041289206507888 | T | T | T |
| 0.2495484545291589 | 0.5010736732338390  | 0.3360959660622860 | T | T | T |
| 0.4166600000000003 | 0.5000000000000000  | 0.0679000000000016 | F | F | F |
| 0.4164012179833584 | 0.5000541166385861  | 0.2037514055155561 | T | T | T |
| 0.4184350502412270 | 0.4986367360469136  | 0.3399001463862761 | T | T | T |
| 0.0833299999999966 | 0.8333299999999966  | 0.0679000000000016 | F | F | F |
| 0.0837208416856862 | 0.8325572617532861  | 0.2034113978765368 | T | T | T |
| 0.0821357985033846 | 0.8358562828883782  | 0.3414511984843072 | T | T | T |
| 0.2500000000000000 | 0.8333299999999966  | 0.0679000000000016 | F | F | F |
| 0.2499148474642185 | 0.8327699334261872  | 0.2037767086781094 | T | T | T |
| 0.2506862634010527 | 0.8384837291234185  | 0.3400866177233304 | T | T | T |
| 0.4166600000000003 | 0.8333299999999966  | 0.0679000000000016 | F | F | F |
| 0.4163567909641085 | 0.8326022187900141  | 0.2034281719800537 | T | T | T |
| 0.4189457199362568 | 0.8355251674671763  | 0.3410114464598251 | T | T | T |
| 0.5833299999999966 | 0.1666700000000034  | 0.0679000000000016 | F | F | F |
| 0.5837491841278365 | 0.1673623328754697  | 0.2034138230995375 | T | T | T |
| 0.5822999029424545 | 0.1623446526685244  | 0.3409780780140095 | T | T | T |
| 0.7500000000000000 | 0.1666700000000034  | 0.0679000000000016 | F | F | F |
| 0.7499680131852828 | 0.1671408089770687  | 0.2037362368676841 | T | T | T |
| 0.7507444668008132 | 0.1633612620178956  | 0.3398256884739649 | T | T | T |
| 0.9166600000000003 | 0.1666700000000034  | 0.0679000000000016 | F | F | F |
| 0.9163167481775535 | 0.1674158717792150  | 0.2033395403775494 | T | T | T |
| 0.9186296117731217 | 0.1628321769003163  | 0.3400550229889250 | T | T | T |
| 0.5833299999999966 | 0.5000000000000000  | 0.0679000000000016 | F | F | F |
| 0.5836201543178473 | 0.5001433256683947  | 0.2037624656873023 | T | T | T |
| 0.5809094444219077 | 0.4985978878551857  | 0.3399519304721142 | T | T | T |
| 0.7500000000000000 | 0.5000000000000000  | 0.0679000000000016 | F | F | F |
| 0.7499386404618765 | 0.5001570695975789  | 0.2041071299492043 | T | T | T |
| 0.7495140572474162 | 0.5011422876577575  | 0.3360803816907602 | T | T | T |
| 0.9166600000000003 | 0.5000000000000000  | 0.0679000000000016 | F | F | F |
| 0.9164592919668486 | 0.5001823757558578  | 0.2037540564053749 | T | T | T |
| 0.9185021751153134 | 0.4987676965976006  | 0.3399091070642460 | T | T | T |
| 0.5833299999999966 | 0.8333299999999966  | 0.0679000000000016 | F | F | F |
| 0.5837210324666366 | 0.8326386712342261  | 0.2034359069671697 | T | T | T |
| 0.5822157619300440 | 0.8357462227798459  | 0.3415428393889158 | T | T | T |
| 0.7500000000000000 | 0.8333299999999966  | 0.0679000000000016 | F | F | F |
| 0.7499603682139612 | 0.8328204742553538  | 0.2037869691810259 | T | T | T |
| 0.7507279146887950 | 0.8384031052062852  | 0.3401044416966955 | T | T | T |
| 0.9166600000000003 | 0.8333299999999966  | 0.0679000000000016 | F | F | F |
| 0.9163370985767599 | 0.8325325491289181  | 0.2033715283650986 | T | T | T |
| 0.9189125839762108 | 0.8358430897867902  | 0.3408364672191694 | T | T | T |
| 0.0000000000000000 | 0.0000000000000000  | 0.0000000000000000 | F | F | F |
| 0.0000000000000000 | 0.0000000000000000  | 0.1358099999999993 | F | F | F |
| 0.0002177954346975 | 0.9996870626480204  | 0.2698665281181900 | T | T | T |
| 0.0029593343045734 | 0.9941992145193774  | 0.4033966270510886 | T | T | T |
| 0.1666700000000034 | 0.0000000000000000  | 0.0000000000000000 | F | F | F |
| 0.1666700000000034 | 0.0000000000000000  | 0.1358099999999993 | F | F | F |
| 0.1665182608697567 | 0.9999330196579286  | 0.2716277318309220 | T | T | T |
| 0.1701852981271464 | 0.0012703665690224  | 0.4092340248820440 | T | T | T |
| 0.3333399999999997 | 0.0000000000000000  | 0.0000000000000000 | F | F | F |
| 0.3333399999999997 | 0.0000000000000000  | 0.1358099999999993 | F | F | F |
| 0.3336256502444503 | -0.0001226943835138 | 0.2714980348624828 | T | T | T |
| 0.3376902983213327 | 0.0015150597235420  | 0.4094089349391406 | T | T | T |

0.0000000000000000 0.3333299999999966 0.0000000000000000 F F F  
0.0000000000000000 0.3333299999999966 0.1358099999999993 F F F  
0.0000613637412155 0.3328742787334074 0.2714951142191595 T T T  
0.4991938841133003 0.3242377656572895 0.4092841469399621 T T T  
0.1666700000000034 0.3333299999999966 0.0000000000000000 F F F  
0.1666700000000034 0.3333299999999966 0.1358099999999993 F F F  
0.1655744319783408 0.3312343429689613 0.2733282015549848 T T T  
0.1708870285606374 0.3444328898635641 0.4076684572671597 T T T  
0.3333399999999997 0.3333299999999966 0.0000000000000000 F F F  
0.3333399999999997 0.3333299999999966 0.1358099999999993 F F F  
0.3343146384141699 0.3312701714853361 0.2732985002455270 T T T  
0.3275997851489402 0.3446427530617897 0.4075644792540239 T T T  
0.0000000000000000 0.6666700000000034 0.0000000000000000 F F F  
0.0000000000000000 0.6666700000000034 0.1358099999999993 F F F  
0.0000632577821992 0.6670603977448158 0.2716057746683855 T T T  
0.4994612757582657 0.6595337127380688 0.4090927067526334 T T T  
0.1666700000000034 0.6666700000000034 0.0000000000000000 F F F  
0.1666700000000034 0.6666700000000034 0.1358099999999993 F F F  
0.1655573872461203 0.6689227380443286 0.2733360674768912 T T T  
0.1711340638980765 0.6579211668431074 0.4076651245974970 T T T  
0.3333399999999997 0.6666700000000034 0.0000000000000000 F F F  
0.3333399999999997 0.6666700000000034 0.1358099999999993 F F F  
0.3344091442470315 0.6688067926402934 0.2733356133350580 T T T  
0.3279442641994440 0.6580885322071631 0.4076541093174752 T T T  
0.1731421646714526 0.1713424319280789 0.4852596440682238 T T T  
0.3236831236166352 0.8331710835277639 0.4852382192839375 T T T  
0.4144002908497586 0.3513618938196976 0.4848313704785245 T T T  
0.0836706034551881 0.6532579180361471 0.4853248181422394 T T T  
0.1733892475941753 0.8326864981016547 0.4853832538126686 T T T  
0.3238337621433429 0.1712601490590185 0.4851186604500089 T T T  
0.4146272565283660 0.6546052753346719 0.4850611995543986 T T T  
0.0835105520553051 0.3523839439805261 0.4852312851221753 T T T  
0.5000000000000000 0.0000000000000000 0.0000000000000000 F F F  
0.5000000000000000 0.0000000000000000 0.1358099999999993 F F F  
0.5002466882400360 0.9995466421862019 0.2699602816059122 T T T  
0.5030854241963676 0.9939795686466373 0.4034439964209587 T T T  
0.6666700000000034 0.0000000000000000 0.0000000000000000 F F F  
0.6666700000000034 0.0000000000000000 0.1358099999999993 F F F  
0.6665576593628938 -0.0000411447067209 0.2716071844878715 T T T  
0.6704835831960219 0.0015907852273109 0.4091758409462601 T T T  
0.8333399999999997 0.0000000000000000 0.0000000000000000 F F F  
0.8333399999999997 0.0000000000000000 0.1358099999999993 F F F  
0.8336700539630632 -0.0000252926585090 0.2714790116446590 T T T  
0.8377016330228890 0.0015050277052188 0.4094330866573429 T T T  
0.5000000000000000 0.3333299999999966 0.0000000000000000 F F F  
0.5000000000000000 0.3333299999999966 0.1358099999999993 F F F  
0.5000577652379091 0.3327122001896206 0.2714429582359986 T T T  
0.9992888117753477 0.3248608836451562 0.4094285279469820 T T T  
0.6666700000000034 0.3333299999999966 0.0000000000000000 F F F  
0.6666700000000034 0.3333299999999966 0.1358099999999993 F F F  
0.6656473706913497 0.3312266213910819 0.2732936136231553 T T T  
0.6712106735203824 0.3443813384755471 0.4076239787596983 T T T  
0.8333399999999997 0.3333299999999966 0.0000000000000000 F F F  
0.8333399999999997 0.3333299999999966 0.1358099999999993 F F F  
0.8343660382312423 0.3314097724397181 0.2732513969654866 T T T  
0.8278795522406727 0.3445791089831681 0.4074813797605845 T T T  
0.5000000000000000 0.6666700000000034 0.0000000000000000 F F F  
0.5000000000000000 0.6666700000000034 0.1358099999999993 F F F  
0.5000597467707286 0.6668674100540791 0.2715623134369156 T T T  
0.9994074312435067 0.6600003100351903 0.4092490618838544 T T T  
0.6666700000000034 0.6666700000000034 0.0000000000000000 F F F  
0.6666700000000034 0.6666700000000034 0.1358099999999993 F F F  
0.6655967477105061 0.6689482664560086 0.2733111785202426 T T T  
0.6712362218099576 0.6579271444494698 0.4076956015550495 T T T  
0.8333399999999997 0.6666700000000034 0.0000000000000000 F F F  
0.8333399999999997 0.6666700000000034 0.1358099999999993 F F F  
0.8344204782009204 0.6689081194847306 0.2733148689998734 T T T  
0.8280736177475970 0.6580278115341779 0.4075886569107741 T T T  
0.6735150599113705 0.1715824512034238 0.4852790834807145 T T T  
0.8238961005590161 0.8328927651232153 0.4852778998003891 T T T



|                    |                    |                    |   |   |   |
|--------------------|--------------------|--------------------|---|---|---|
| 0.9143482764635441 | 0.3521773013479781 | 0.4851003279218297 | T | T | T |
| 0.5835943862263435 | 0.6545480275199134 | 0.4850628548310740 | T | T | T |
| 0.6737250317790352 | 0.8331472485850500 | 0.4852830074309525 | T | T | T |
| 0.8240937396116306 | 0.1713343812366022 | 0.4851259818704710 | T | T | T |
| 0.9143139171035646 | 0.6535938942082116 | 0.4853097475296018 | T | T | T |
| 0.5833594713439847 | 0.3515786991956226 | 0.4847115739800985 | T | T | T |
| 0.0000000000000000 | 0.1666700000000034 | 0.0000000000000000 | F | F | F |
| 0.0000000000000000 | 0.1666700000000034 | 0.1358099999999993 | F | F | F |
| 0.0000000000000000 | 0.0000000000000000 | 0.0679000000000016 | F | F | F |
| 0.0833299999999966 | 0.0000000000000000 | 0.0000000000000000 | F | F | F |
| 0.0833299999999966 | 0.0000000000000000 | 0.1358099999999993 | F | F | F |
| 0.4997722522603268 | 0.1668154288144177 | 0.2713549543053542 | T | T | T |
| 0.4987867756565765 | 0.1680653586418649 | 0.4043905893263492 | T | T | T |
| 0.4997255272972869 | 0.0003861668068327 | 0.2033782587003266 | T | T | T |
| 0.4997092175770443 | 0.0006602466939979 | 0.3386007678372595 | T | T | T |
| 0.0828769612223247 | 0.0006247853495898 | 0.2708777309449102 | T | T | T |
| 0.0818900505648246 | 0.0023477317989447 | 0.4043949275412235 | T | T | T |
| 0.1666700000000034 | 0.1666700000000034 | 0.0000000000000000 | F | F | F |
| 0.1666700000000034 | 0.1666700000000034 | 0.1358099999999993 | F | F | F |
| 0.1666700000000034 | 0.0000000000000000 | 0.0679000000000016 | F | F | F |
| 0.2500000000000000 | 0.0000000000000000 | 0.0000000000000000 | F | F | F |
| 0.2500000000000000 | 0.0000000000000000 | 0.1358099999999993 | F | F | F |
| 0.1667281268721920 | 0.1659760486582046 | 0.2703805271069502 | T | T | T |
| 0.1679531630311319 | 0.1689571420529919 | 0.4180193165442359 | T | T | T |
| 0.1668207959279785 | 0.0003005096347334 | 0.2034783868185483 | T | T | T |
| 0.1638955364492181 | 0.0006200255310382 | 0.3404586592361716 | T | T | T |
| 0.2497832903598871 | 0.0004685800228781 | 0.2725568841364011 | T | T | T |
| 0.2481701086065271 | 0.0018876506364368 | 0.4009329227339754 | T | T | T |
| 0.3333399999999997 | 0.1666700000000034 | 0.0000000000000000 | F | F | F |
| 0.3333399999999997 | 0.1666700000000034 | 0.1358099999999993 | F | F | F |
| 0.3333399999999997 | 0.0000000000000000 | 0.0679000000000016 | F | F | F |
| 0.4166600000000003 | 0.0000000000000000 | 0.0000000000000000 | F | F | F |
| 0.4166600000000003 | 0.0000000000000000 | 0.1358099999999993 | F | F | F |
| 0.3328446304346529 | 0.1659496506301404 | 0.2703434823408873 | T | T | T |
| 0.3294594649656661 | 0.1680857847093342 | 0.4178732022900479 | T | T | T |
| 0.3330835910432193 | 0.0003939374184326 | 0.2035340083549596 | T | T | T |
| 0.3342783779320614 | 0.0009040563357188 | 0.3407645640651966 | T | T | T |
| 0.4166373601576798 | 0.0006194381739979 | 0.2713780744058154 | T | T | T |
| 0.4158646952336109 | 0.0024668134138251 | 0.4045863150856451 | T | T | T |
| 0.0000000000000000 | 0.5000000000000000 | 0.0000000000000000 | F | F | F |
| 0.0000000000000000 | 0.5000000000000000 | 0.1358099999999993 | F | F | F |
| 0.0000000000000000 | 0.5000000000000000 | 0.0679000000000016 | F | F | F |
| 0.0833299999999966 | 0.3333299999999966 | 0.0000000000000000 | F | F | F |
| 0.0833299999999966 | 0.3333299999999966 | 0.1358099999999993 | F | F | F |
| 0.9998044389693699 | 0.5005440960877814 | 0.2724928488005680 | T | T | T |
| 0.4992800981718767 | 0.5034488597827457 | 0.4012069539401740 | T | T | T |
| 0.9998503821384497 | 0.3338092875676121 | 0.2035231295657362 | T | T | T |
| 0.4995001688342650 | 0.3316315671447337 | 0.3407703277033115 | T | T | T |
| 0.0825146629567426 | 0.3344038657573218 | 0.2702364821620478 | T | T | T |
| 0.0822293860794640 | 0.3410901166213747 | 0.4178729973851177 | T | T | T |
| 0.1666700000000034 | 0.5000000000000000 | 0.0000000000000000 | F | F | F |
| 0.1666700000000034 | 0.5000000000000000 | 0.1358099999999993 | F | F | F |
| 0.1666700000000034 | 0.3333299999999966 | 0.0679000000000016 | F | F | F |
| 0.2500000000000000 | 0.3333299999999966 | 0.0000000000000000 | F | F | F |
| 0.2500000000000000 | 0.3333299999999966 | 0.1358099999999993 | F | F | F |
| 0.1661740744766011 | 0.5004950252481490 | 0.2760833289088460 | T | T | T |
| 0.1662606988923383 | 0.5013309003855021 | 0.3963570078027692 | T | T | T |
| 0.1677165370735286 | 0.3358334965309877 | 0.2046252355655522 | T | T | T |
| 0.1574463045572253 | 0.3173034012712186 | 0.3408645456208086 | T | T | T |
| 0.2497446262636334 | 0.3334114584992772 | 0.2762009886234368 | T | T | T |
| 0.2492440052926898 | 0.3356446971503302 | 0.3961466279825928 | T | T | T |
| 0.3333399999999997 | 0.5000000000000000 | 0.0000000000000000 | F | F | F |
| 0.3333399999999997 | 0.5000000000000000 | 0.1358099999999993 | F | F | F |
| 0.3333399999999997 | 0.3333299999999966 | 0.0679000000000016 | F | F | F |
| 0.4166600000000003 | 0.3333299999999966 | 0.0000000000000000 | F | F | F |
| 0.4166600000000003 | 0.3333299999999966 | 0.1358099999999993 | F | F | F |
| 0.3333411391582555 | 0.5004987335539397 | 0.2762796090395812 | T | T | T |
| 0.3326284230696755 | 0.5014330713696754 | 0.3961581502412808 | T | T | T |
| 0.3320256286405758 | 0.3360108075818892 | 0.2046597523067540 | T | T | T |
| 0.3415450157792834 | 0.3166320139717712 | 0.3408700066547637 | T | T | T |

0.4170324271243278 0.3343163982656228 0.2703854914012269 T T T  
0.4159738224800157 0.3395948258351479 0.4177035542677935 T T T  
0.0000000000000000 0.8333299999999966 0.0000000000000000 F F F  
0.0000000000000000 0.8333299999999966 0.1358099999999993 F F F  
0.0000000000000000 0.6666700000000034 0.0679000000000016 F F F  
0.0833299999999966 0.6666700000000034 0.0000000000000000 F F F  
0.0833299999999966 0.6666700000000034 0.1358099999999993 F F F  
0.4997593668132281 0.8341684293011286 0.2710391731963012 T T T  
0.4989795546671065 0.8362955596730902 0.4042969982387060 T T T  
0.9998622790530297 0.6664330272534742 0.2034682865686054 T T T  
0.4998632575677742 0.6717064692421413 0.3405119059191486 T T T  
0.0826019462567231 0.6666485967242680 0.2702892002674400 T T T  
0.0827846024471364 0.6640347102413191 0.4180063473184650 T T T  
0.1666700000000034 0.8333299999999966 0.0000000000000000 F F F  
0.1666700000000034 0.8333299999999966 0.1358099999999993 F F F  
0.1666700000000034 0.6666700000000034 0.0679000000000016 F F F  
0.2500000000000000 0.6666700000000034 0.0000000000000000 F F F  
0.2500000000000000 0.6666700000000034 0.1358099999999993 F F F  
0.1667116055608368 0.8348759573641481 0.2702740730605466 T T T  
0.1682235839061616 0.8345126070606039 0.4180277492990665 T T T  
0.1677383968822947 0.6645355343082827 0.2046078928570025 T T T  
0.1580138575541106 0.6842663700668318 0.3408542784010968 T T T  
0.2498176512603706 0.6677374523193889 0.2760868226498091 T T T  
0.2494726114949472 0.6671609135983584 0.3964282307848004 T T T  
0.3333399999999997 0.8333299999999966 0.0000000000000000 F F F  
0.3333399999999997 0.8333299999999966 0.1358099999999993 F F F  
0.3333399999999997 0.6666700000000034 0.0679000000000016 F F F  
0.4166600000000003 0.6666700000000034 0.0000000000000000 F F F  
0.4166600000000003 0.6666700000000034 0.1358099999999993 F F F  
0.3328550849507961 0.8349610275688363 0.2702120259536359 T T T  
0.3294466559911968 0.8356611799653362 0.4178384297880024 T T T  
0.3321166390667879 0.6644160918513075 0.2046486029643539 T T T  
0.3414144510162270 0.6851345185716387 0.3408496403397765 T T T  
0.4170640191255797 0.6665287311525333 0.2704354444085486 T T T  
0.4157234268071602 0.6651773506737968 0.4179093868994949 T T T  
0.3311404597717921 0.0020687049205605 0.4781537687733943 T T T  
0.1671289142469282 0.0018873976774244 0.4782261776258766 T T T  
0.1685680930377676 0.3416723988272322 0.4723635398312723 T T T  
0.1039623375245571 0.2134034058843464 0.5126802651782397 T T T  
0.3293345201519467 0.6630727139842590 0.4723632659672618 T T T  
0.3931047680248542 0.7929496352087836 0.5126671752068191 T T T  
0.3292089094023500 0.3415575563674479 0.4722003007658843 T T T  
0.3932172146470462 0.2125919185347667 0.5124842176566208 T T T  
0.1687024774079387 0.6625957438032850 0.4725514332978445 T T T  
0.1040930011987452 0.7917409747613844 0.5128556429386596 T T T  
0.2485769033386118 0.1772737551029382 0.5052836350493134 T T T  
0.2486401391819238 0.8271408144169990 0.5056646669798540 T T T  
0.4116730225523885 0.5026037787767812 0.5029008127334691 T T T  
0.0863244274260029 0.5025736420486037 0.5055026613422199 T T T  
0.4990249410592820 0.3362795148212763 0.4781111132134152 T T T  
0.4991540706928537 0.6668366150607644 0.4782595629171870 T T T  
0.5000000000000000 0.1666700000000034 0.0000000000000000 F F F  
0.5000000000000000 0.1666700000000034 0.1358099999999993 F F F  
0.5000000000000000 0.0000000000000000 0.0679000000000016 F F F  
0.5833299999999966 0.0000000000000000 0.0000000000000000 F F F  
0.5833299999999966 0.0000000000000000 0.1358099999999993 F F F  
0.9997345597895780 0.1668494729896987 0.2714378760431226 T T T  
0.9987786104007096 0.1684441757335277 0.4044339506532215 T T T  
0.9997163502961698 0.0006799421337402 0.2033310727615147 T T T  
0.9997212686983828 0.0006007011124256 0.3385957969462093 T T T  
0.5828944360179651 0.0005160806720565 0.2709227460957806 T T T  
0.5820444971847112 0.0022748375677973 0.4044013437188597 T T T  
0.6666700000000034 0.1666700000000034 0.0000000000000000 F F F  
0.6666700000000034 0.1666700000000034 0.1358099999999993 F F F  
0.6666700000000034 0.0000000000000000 0.0679000000000016 F F F  
0.7500000000000000 0.0000000000000000 0.0000000000000000 F F F  
0.7500000000000000 0.0000000000000000 0.1358099999999993 F F F  
0.6667393860076937 0.1660008504110223 0.2703027926773214 T T T  
0.6682367719829649 0.1690306325499269 0.4179168532717280 T T T  
0.6668207790321182 0.0002878878850468 0.2034686420336615 T T T

|                    |                    |                    |   |   |   |
|--------------------|--------------------|--------------------|---|---|---|
| 0.6640358792102835 | 0.0007563608126227 | 0.3404326562657106 | T | T | T |
| 0.7498242687130944 | 0.0005046410408981 | 0.2725270726718659 | T | T | T |
| 0.7484986926235595 | 0.0021417226291112 | 0.4008194677695809 | T | T | T |
| 0.8333399999999997 | 0.1666700000000034 | 0.0000000000000000 | F | F | F |
| 0.8333399999999997 | 0.1666700000000034 | 0.1358099999999993 | F | F | F |
| 0.8333399999999997 | 0.0000000000000000 | 0.0679000000000016 | F | F | F |
| 0.9166600000000003 | 0.0000000000000000 | 0.0000000000000000 | F | F | F |
| 0.9166600000000003 | 0.0000000000000000 | 0.1358099999999993 | F | F | F |
| 0.8329220691218140 | 0.1659340115061767 | 0.2702858392030455 | T | T | T |
| 0.8296964002444152 | 0.1681359107835833 | 0.4178880354473021 | T | T | T |
| 0.8331307160813836 | 0.0003689570868794 | 0.2035094854866292 | T | T | T |
| 0.8343959591561011 | 0.0007888669985266 | 0.3407311080064050 | T | T | T |
| 0.9166664254862801 | 0.0005471617707652 | 0.2713601064670138 | T | T | T |
| 0.9159089394395848 | 0.0026233530132963 | 0.4045024159158604 | T | T | T |
| 0.5000000000000000 | 0.5000000000000000 | 0.0000000000000000 | F | F | F |
| 0.5000000000000000 | 0.5000000000000000 | 0.1358099999999993 | F | F | F |
| 0.5000000000000000 | 0.3333299999999966 | 0.0679000000000016 | F | F | F |
| 0.5833299999999966 | 0.3333299999999966 | 0.0000000000000000 | F | F | F |
| 0.5833299999999966 | 0.3333299999999966 | 0.1358099999999993 | F | F | F |
| 0.4997787529808873 | 0.5004046088075769 | 0.2725115166037635 | T | T | T |
| 0.9991315881968361 | 0.5038533129868008 | 0.4010110211314171 | T | T | T |
| 0.4997897038802082 | 0.3338938212494227 | 0.2035484335127201 | T | T | T |
| 0.9996081066605207 | 0.3318558999353300 | 0.3407616562669785 | T | T | T |
| 0.5825157416167968 | 0.3344530816427960 | 0.2702476848513191 | T | T | T |
| 0.5822778853645015 | 0.3395805110373500 | 0.4175962751696016 | T | T | T |
| 0.6666700000000034 | 0.5000000000000000 | 0.0000000000000000 | F | F | F |
| 0.6666700000000034 | 0.5000000000000000 | 0.1358099999999993 | F | F | F |
| 0.6666700000000034 | 0.3333299999999966 | 0.0679000000000016 | F | F | F |
| 0.7500000000000000 | 0.3333299999999966 | 0.0000000000000000 | F | F | F |
| 0.7500000000000000 | 0.3333299999999966 | 0.1358099999999993 | F | F | F |
| 0.6662254178459484 | 0.5004964935270491 | 0.2760432156778119 | T | T | T |
| 0.6661568707595038 | 0.5013544478167962 | 0.3964157663691365 | T | T | T |
| 0.6677663904128647 | 0.3359050924542193 | 0.2046038097090517 | T | T | T |
| 0.6576223263786798 | 0.3174168247799839 | 0.3407706352988998 | T | T | T |
| 0.7498264303177949 | 0.3333949286071098 | 0.2761670080768421 | T | T | T |
| 0.7494602192530133 | 0.3355338271536078 | 0.3960182071885172 | T | T | T |
| 0.8333399999999997 | 0.5000000000000000 | 0.0000000000000000 | F | F | F |
| 0.8333399999999997 | 0.5000000000000000 | 0.1358099999999993 | F | F | F |
| 0.8333399999999997 | 0.3333299999999966 | 0.0679000000000016 | F | F | F |
| 0.9166600000000003 | 0.3333299999999966 | 0.0000000000000000 | F | F | F |
| 0.9166600000000003 | 0.3333299999999966 | 0.1358099999999993 | F | F | F |
| 0.8333726137587701 | 0.5005183866331113 | 0.2762917652364373 | T | T | T |
| 0.8325428103185107 | 0.5014045454667213 | 0.3959742382464115 | T | T | T |
| 0.8320588568572237 | 0.3360262094902091 | 0.2046355291708317 | T | T | T |
| 0.8417903405012526 | 0.3163727340275594 | 0.3408507981060930 | T | T | T |
| 0.9170773433027820 | 0.3344335383046482 | 0.2703039012853216 | T | T | T |
| 0.9160045526967159 | 0.3409554005065664 | 0.4178322523457342 | T | T | T |
| 0.5000000000000000 | 0.8333299999999966 | 0.0000000000000000 | F | F | F |
| 0.5000000000000000 | 0.8333299999999966 | 0.1358099999999993 | F | F | F |
| 0.5000000000000000 | 0.6666700000000034 | 0.0679000000000016 | F | F | F |
| 0.5833299999999966 | 0.6666700000000034 | 0.0000000000000000 | F | F | F |
| 0.5833299999999966 | 0.6666700000000034 | 0.1358099999999993 | F | F | F |
| 0.9997923804907143 | 0.8343334421464219 | 0.2708654417152682 | T | T | T |
| 0.9988697545204572 | 0.8363068391960400 | 0.4044050099033585 | T | T | T |
| 0.4998616778246543 | 0.6664893409111302 | 0.2034977115350090 | T | T | T |
| 0.9997391860349834 | 0.6722671965847440 | 0.3404561401507032 | T | T | T |
| 0.5826231142323997 | 0.6665360051347879 | 0.2702953322882081 | T | T | T |
| 0.5828292383225571 | 0.6651364154989551 | 0.4179337052305628 | T | T | T |
| 0.6666700000000034 | 0.8333299999999966 | 0.0000000000000000 | F | F | F |
| 0.6666700000000034 | 0.8333299999999966 | 0.1358099999999993 | F | F | F |
| 0.6666700000000034 | 0.6666700000000034 | 0.0679000000000016 | F | F | F |
| 0.7500000000000000 | 0.6666700000000034 | 0.0000000000000000 | F | F | F |
| 0.7500000000000000 | 0.6666700000000034 | 0.1358099999999993 | F | F | F |
| 0.6667355617836538 | 0.8348593390729117 | 0.2702412457188562 | T | T | T |
| 0.6686063645910938 | 0.8348020338948076 | 0.4179323742106352 | T | T | T |
| 0.6677579756232918 | 0.6645251601120831 | 0.2046002799640262 | T | T | T |
| 0.6581035311528766 | 0.6842000806117328 | 0.3408418500504515 | T | T | T |
| 0.7498260823568060 | 0.6677356834551277 | 0.2760587745347994 | T | T | T |
| 0.7495039454018656 | 0.6670970292549891 | 0.3964495924774367 | T | T | T |
| 0.8333399999999997 | 0.8333299999999966 | 0.0000000000000000 | F | F | F |

|                    |                    |                    |   |   |   |
|--------------------|--------------------|--------------------|---|---|---|
| 0.8333399999999999 | 0.8333299999999999 | 0.1358099999999999 | F | F | F |
| 0.8333399999999999 | 0.6666700000000003 | 0.0679000000000001 | F | F | F |
| 0.9166600000000003 | 0.6666700000000003 | 0.0000000000000000 | F | F | F |
| 0.9166600000000003 | 0.6666700000000003 | 0.1358099999999999 | F | F | F |
| 0.8328743135211272 | 0.8349954485258831 | 0.2701721855617168 | T | T | T |
| 0.8295300530009515 | 0.8355958192057011 | 0.4178981104686024 | T | T | T |
| 0.8321157886108341 | 0.6643889993307340 | 0.2046267798720348 | T | T | T |
| 0.8413846402342590 | 0.6854023304503593 | 0.3408359902205265 | T | T | T |
| 0.9170527645741213 | 0.6666619833807352 | 0.2703759865238697 | T | T | T |
| 0.9155877856733862 | 0.6642886806317205 | 0.4180169676145340 | T | T | T |
| 0.8313428613904734 | 0.0020296865687283 | 0.4781798539843641 | T | T | T |
| 0.6676206749535019 | 0.0022969484717245 | 0.4781013250592936 | T | T | T |
| 0.6688360950514853 | 0.3416205173184095 | 0.4722754571849745 | T | T | T |
| 0.6043818325251031 | 0.2131593837358768 | 0.5126749216971419 | T | T | T |
| 0.8292829596345943 | 0.6626417730554459 | 0.4723443017796862 | T | T | T |
| 0.8329211909133111 | 0.7917848003069244 | 0.5128486874715877 | T | T | T |
| 0.8293160681051532 | 0.3416954628564010 | 0.4721185222690266 | T | T | T |
| 0.8935384341188892 | 0.2132517076708756 | 0.5124128134893973 | T | T | T |
| 0.6688392201331150 | 0.6631557572514024 | 0.4725940890311697 | T | T | T |
| 0.6043178743579781 | 0.7936720917198380 | 0.5124368675419982 | T | T | T |
| 0.7489719224742034 | 0.1776815375578679 | 0.5053773501016940 | T | T | T |
| 0.7490386405617486 | 0.8272592061790230 | 0.5058255803676699 | T | T | T |
| 0.9115065043902726 | 0.5026686049170498 | 0.5052499156679651 | T | T | T |
| 0.5863018234171740 | 0.5025367445988101 | 0.5029022663682138 | T | T | T |
| 0.9990115342042989 | 0.3373972312663033 | 0.4781665705941204 | T | T | T |
| 0.9990754545237430 | 0.6658979594214600 | 0.4782106379774591 | T | T | T |
| 0.4922289806361776 | 0.4839698686241537 | 0.6060160559646612 | T | T | T |
| 0.5454541425168761 | 0.5587505940876666 | 0.6078711748574909 | T | T | T |
| 0.4365311840950224 | 0.5508579346039600 | 0.6085105080003830 | T | T | T |
| 0.6009687288120498 | 0.4906919363963085 | 0.6087009856660228 | T | T | T |
| 0.3833941641246622 | 0.4754367347536049 | 0.6077739220417530 | T | T | T |
| 0.6540931609618433 | 0.5626131103012327 | 0.5997919912732993 | T | T | T |
| 0.3286462764276908 | 0.5416508130928130 | 0.5982753375046806 | T | T | T |
| 0.7078261959683837 | 0.4912061613476785 | 0.5929691013539157 | T | T | T |
| 0.4935577354248589 | 0.4207673346356639 | 0.6343161104304478 | T | T | T |
| 0.4929576128140457 | 0.4346495754122441 | 0.5733787497211119 | T | T | T |
| 0.5434911363893073 | 0.6153863749515752 | 0.6383290160089177 | T | T | T |
| 0.5452721982923925 | 0.6163084779759583 | 0.5774597481466586 | T | T | T |
| 0.4348934813786773 | 0.6117453161503746 | 0.5792656967109271 | T | T | T |
| 0.4360896617298060 | 0.6041808370164415 | 0.6399941250957395 | T | T | T |
| 0.5988598041584438 | 0.4226026534923860 | 0.5824200469285786 | T | T | T |
| 0.6050700043255154 | 0.4466617847188449 | 0.6423313585580644 | T | T | T |
| 0.3801669109765128 | 0.4298945556110340 | 0.6410959881438683 | T | T | T |
| 0.3885120912312580 | 0.4086344344047504 | 0.5812280962682768 | T | T | T |
| 0.6599480789900685 | 0.6235096061521418 | 0.6285116990908350 | T | T | T |
| 0.6473383405348632 | 0.6149048050183905 | 0.5685168533653061 | T | T | T |
| 0.3228281432062938 | 0.6106009617941983 | 0.6236064063324416 | T | T | T |
| 0.3295419820884053 | 0.5800835136903392 | 0.5635037590096689 | T | T | T |
| 0.2910306876997176 | 0.4864185176969729 | 0.5998130426115991 | T | T | T |
| 0.7454060810928286 | 0.5450508814106875 | 0.5874052699404898 | T | T | T |
| 0.7035441665481731 | 0.4356928379612672 | 0.5624343602924514 | T | T | T |
| 0.7160772960174393 | 0.4368375709651124 | 0.6232914649596053 | T | T | T |
